# Supplementary material for: Catalytic mutual multicomponent reaction: facile access to α-trifluoromethylthiolated ketones
Source: Royal Society of Chemistry journal article supplement (doi:10.1039/d0cc04555a), 2020-01-01

## Supporting Information

### Catalytic Mutual Multicomponent Reaction: Facile Access to $\alpha$ -Trifluoromethylthiolated Ketones

Ming Yu Jin,<sup>a</sup> Xiaodong Gu,<sup>a</sup> Min Deng,<sup>a</sup> Chuancheng Wang<sup>a</sup> and Jun (Joelle) Wang<sup>\*a,b</sup>

<sup>a</sup>Shenzhen Grubbs Institute and Department of Chemistry, Southern University of Science and Technology, Shenzhen 518055, Guangdong, China

<sup>b</sup>Department of Chemistry, Hong Kong Baptist University, Kowloon, Hong Kong

E-mail: junwang@hkbu.edu.hk

#### Table of Contents

|                                                                                                                                                                     |      |
|---------------------------------------------------------------------------------------------------------------------------------------------------------------------|------|
| General Information.....                                                                                                                                            | S-2  |
| General Procedure for Synthesis of $\alpha$ -Trifluoromethylthiolated Ketones and $\beta$ -Amino Esters via a Catalytic Mutual Multicomponent Reaction Pathway..... | S-3  |
| Analytic Data for Products.....                                                                                                                                     | S-3  |
| Scale-up Experiment.....                                                                                                                                            | S-22 |
| General Procedure for a Double Asymmetric Cascade Reaction Catalyzed by Quinidine.....                                                                              | S-23 |
| HPLC Spectra.....                                                                                                                                                   | S-24 |
| Reference.....                                                                                                                                                      | S-26 |
| <sup>1</sup> H NMR, <sup>13</sup> C NMR and <sup>19</sup> F NMR.....                                                                                                | S-27 |

## General Information

Unless Stated otherwise, the reactions and manipulations were performed under an atmosphere of argon by using standard Schlenk techniques and Drybox (Mikrouna, Supper 1220/750). Analytical thin layer chromatography (TLC) was performed on precoated silica gel 60GF254 plates. Flash column chromatography was performed using Tsingdao silica gel (60, particle size 0.040-0.063 mm). <sup>1</sup>H, <sup>13</sup>C and <sup>19</sup>F NMR spectra were recorded on a Bruker at 600 MHz, 125 MHz and 376 MHz. Chemical shift values are reported in ppm from tetramethylsilane as the internal standard (TMS: δ 7.26 for <sup>1</sup>H and δ 77.16 for <sup>13</sup>C). Data are reported as follows: chemical shifts, integration, multiplicity (s = singlet, d = doublet, t = triplet, q = quartet, dd = doublet of doublets, dq = doublet of quartets, m = multiplet), and coupling constants (Hz). The enantiomeric excess values were determined by chiral HPLC with an Agilent 1200 LC instrument. High resolution mass spectroscopy (HRMS) analyses were performed at a Bruker Daltonics. Inc mass instrument (ESI). Commercial grade reagents and solvents were used without further purification except as indicated below. Toluene was distilled from sodium. Tetrahydrofuran was distilled from sodium and benzophenone. Dichloromethane was distilled from calcium hydride. Acetonitrile was distilled from both P<sub>2</sub>O<sub>5</sub> and calcium hydride according to general method prior to use. N,N-Dimethylformamide and Dimethyl sulfoxide were distilled from calcium hydride. The chiral ligands was purchased from J&K Chemicals. The benzyl ketones (**1a-r**),<sup>[1]</sup> β-keto thioester **1s**,<sup>[2]</sup> 2-thio/2-furanacetophenones (**1t**, **1u**),<sup>[3]</sup> 2-acyl imidazoles (**1v**, **1w**),<sup>[4]</sup> monoarylated methyl ketone **1x**,<sup>[5]</sup> β-ketoesters (**5a-i**),<sup>[6a,6b]</sup> oxindoles,<sup>[6c]</sup> benzofuranones<sup>[6d]</sup> and MBH carbonates **2**<sup>[7]</sup> were prepared according to the reported procedure.

## General Procedure for Diversity-Oriented Synthesis of $\alpha$ -Trifluoromethylthiolated Ketones and $\alpha$ -Methylene $\beta$ -Amino Ester Libraries

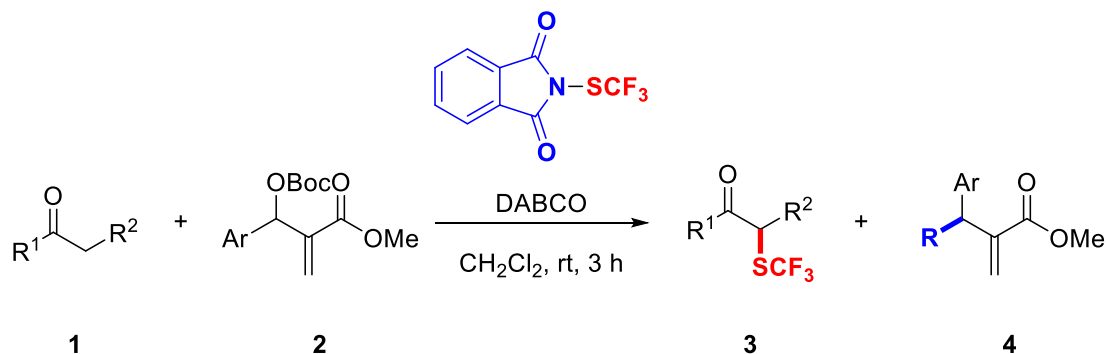

An oven-dried vial fitted with a stirrer bar was charged with acyclic ketones (0.1 mmol), MBH carbonates (0.11 mmol), *N*-SCF<sub>3</sub> phthalimide (0.11 mmol) and DABCO (0.2 equiv) in dry CH<sub>2</sub>Cl<sub>2</sub> (1.0 mL) and the mixture was stirred at room temperature for 3 h. Concentration and purification by silica gel column chromatography gave the product 3 and 4.

### Analytic Data for Products

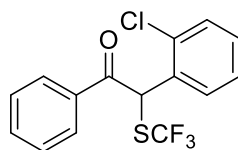

3a

**2-(2-chlorophenyl)-1-phenyl-2-(trifluoromethylthio)ethanone (3a).** <sup>1</sup>H NMR (600 MHz, CDCl<sub>3</sub>)  $\delta$  8.01 (d, *J* = 10.0 Hz, 2H), 7.60-7.53 (m, 1H), 7.49-7.40 (m, 4H), 7.28-7.21 (m, 2H), 6.66 (s, 1H); <sup>13</sup>C NMR (150 MHz, CDCl<sub>3</sub>)  $\delta$  193.1, 134.4, 134.2, 133.4, 133.1, 130.43, 130.42 (q, *J*<sub>CF</sub> = 307.5 Hz), 130.4, 130.2, 129.09, 129.08, 128.1, 52.04; <sup>19</sup>F NMR (376 MHz, CDCl<sub>3</sub>)  $\delta$  -40.27 (s, 3F); HRMS (ESI) calcd for C<sub>15</sub>H<sub>10</sub>ClF<sub>3</sub>OSNa [M+Na]<sup>+</sup> 352.9991, found 352.9987.

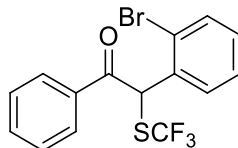

3b

**2-(2-bromophenyl)-1-phenyl-2-(trifluoromethylthio)ethanone (3b).** <sup>1</sup>H NMR (600 MHz, CDCl<sub>3</sub>)  $\delta$  8.02 (d, *J* = 10.0 Hz, 2H), 7.62 (d, *J* = 5.0 Hz, 1H), 7.59-7.55 (m, 1H), 7.49-7.42 (m, 3H), 7.31-7.25 (m, 1H), 7.18-7.14 (m, 1H), 6.63 (s, 1H); <sup>13</sup>C NMR (150 MHz, CDCl<sub>3</sub>)  $\delta$  193.0,

134.5, 134.4, 133.9, 130.6, 130.5, 130.3 (q,  $J_{CF} = 306.0$ ), 129.3, 129.1, 128.9, 124.2, 54.6;  $^{19}\text{F}$  NMR (376 MHz,  $\text{CDCl}_3$ )  $\delta$  -40.16 (s, 3F); HRMS (ESI) calcd for  $\text{C}_{15}\text{H}_{10}\text{BrF}_3\text{OSNa}$   $[\text{M}+\text{Na}]^+$  396.9486, found 396.9482.

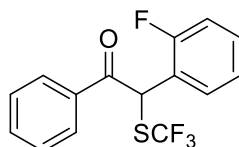

**3c**

**2-(2-fluorophenyl)-1-phenyl-2-(trifluoromethylthio)ethanone (3c).**  $^1\text{H}$  NMR (600 MHz,  $\text{CDCl}_3$ )  $\delta$  8.01-7.94 (m, 2H), 7.60-7.53 (m, 1H), 7.49-7.39 (m, 3H), 7.32-7.25 (m, 1H), 7.16-7.06 (m, 2H), 6.53 (s, 1H);  $^{13}\text{C}$  NMR (150 MHz,  $\text{CDCl}_3$ )  $\delta$  192.8, 159.4 (d,  $J_{CF} = 246.0$  Hz), 134.4, 133.9, 131.0 (d,  $J_{CF} = 7.5$  Hz), 130.6 (q,  $J_{CF} = 306.0$ ), 129.9 (d,  $J_{CF} = 1.5$  Hz), 129.1 (d,  $J_{CF} = 12.0$  Hz), 125.4 (d,  $J_{CF} = 3.0$  Hz), 123.2 (d,  $J_{CF} = 13.5$  Hz), 48.4;  $^{19}\text{F}$  NMR (376 MHz,  $\text{CDCl}_3$ )  $\delta$  -40.48 (s, 3F), -117.85 (s, F); HRMS (ESI) calcd for  $\text{C}_{15}\text{H}_{10}\text{F}_4\text{OSNa}$   $[\text{M}+\text{Na}]^+$  337.0286, found 337.0282.

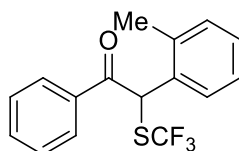

**3d**

**1-phenyl-2-o-tolyl-2-(trifluoromethylthio)ethanone (3d).**  $^1\text{H}$  NMR (600 MHz,  $\text{CDCl}_3$ )  $\delta$  7.86-7.80 (m, 2H), 7.56-7.49 (m, 1H), 7.45-7.37 (m, 2H), 7.28-7.18 (m, 3H), 7.17-7.10 (m, 1H), 6.23 (s, 1H), 2.58 (s, 3H);  $^{13}\text{C}$  NMR (150 MHz,  $\text{CDCl}_3$ )  $\delta$  193.5, 136.2, 135.0, 133.9, 132.1, 131.8, 130.4 (q,  $J_{CF} = 306.0$  Hz), 129.3, 129.0, 128.82, 128.79, 127.3, 53.0, 19.5;  $^{19}\text{F}$  NMR (376 MHz,  $\text{CDCl}_3$ )  $\delta$  -40.76 (s, 3F); HRMS (ESI) calcd for  $\text{C}_{16}\text{H}_{13}\text{F}_3\text{OSNa}$   $[\text{M}+\text{Na}]^+$  333.0537, found 333.0533.

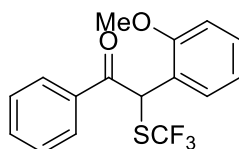

**3e**

**2-(2-methoxyphenyl)-1-phenyl-2-(trifluoromethylthio)ethanone (3e).**  $^1\text{H}$  NMR (600 MHz,  $\text{CDCl}_3$ )  $\delta$  8.02-7.94 (m, 2H), 7.56-7.48 (m, 1H), 7.43-7.36 (m, 2H), 7.35-7.30 (m, 1H), 7.29-7.24 (m, 1H), 6.95-6.88 (m, 2H), 6.68 (s, 1H), 3.97 (s, 3H);  $^{13}\text{C}$  NMR (150 MHz,  $\text{CDCl}_3$ )  $\delta$  193.8, 134.5, 133.9, 130.8 (q,  $J_{CF} = 304.5$  Hz), 130.4, 129.4, 129.0, 128.8, 124.0, 121.7, 111.6, 56.1, 49.2;  $^{19}\text{F}$  NMR (376 MHz,  $\text{CDCl}_3$ )  $\delta$  -40.59 (s, 3F); HRMS (ESI) calcd for  $\text{C}_{16}\text{H}_{13}\text{F}_3\text{O}_2\text{SNa}$   $[\text{M}+\text{Na}]^+$



349.0486, found 349.0483.

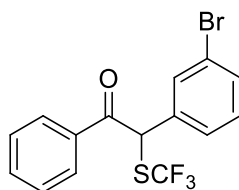

**3f**

**2-(3-bromophenyl)-1-phenyl-2-(trifluoromethylthio)ethanone (3f).**  $^1\text{H NMR}$  (600 MHz,  $\text{CDCl}_3$ )  $\delta$  .96-7.91 (m, 2H), 7.63-7.55 (m, 2H), 7.50-7.36 (m, 4H), 7.25-7.19 (m, 1H), 6.06 (s, 1H);  $^{13}\text{C NMR}$  (150 MHz,  $\text{CDCl}_3$ )  $\delta$  192.2, 137.7, 134.5, 134.1, 132.3, 131.5, 131.0, 130.5 (q,  $J_{\text{CF}} = 306.0$  Hz), 129.3, 129.2, 127.4, 123.4, 55.5;  $^{19}\text{F NMR}$  (376 MHz,  $\text{CDCl}_3$ )  $\delta$  -39.97 (s, 3F); **HRMS** (ESI) calcd for  $\text{C}_{15}\text{H}_{10}\text{F}_3\text{OSNa}$   $[\text{M}+\text{Na}]^+$  396.9484, found 396.9484.

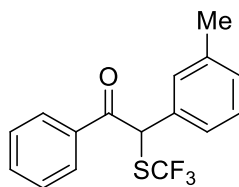

**3g**

**1-phenyl-2-*m*-tolyl-2-(trifluoromethylthio)ethanone (3g).**  $^1\text{H NMR}$  (600 MHz,  $\text{CDCl}_3$ )  $\delta$  7.97-7.92 (m, 2H), 7.58-7.53 (m, 1H), 7.46-7.39 (m, 2H), 7.27-7.22 (m, 3H), 7.13-7.07 (m, 1H), 6.08 (s, 1H), 2.32 (s, 3H);  $^{13}\text{C NMR}$  (150 MHz,  $\text{CDCl}_3$ )  $\delta$  193.3, 139.5, 135.0, 134.5, 134.1, 130.7 (q,  $J_{\text{CF}} = 307.5$  Hz), 130.0, 129.4, 129.3, 129.1, 129.0, 126.0, 56.3, 21.5;  $^{19}\text{F NMR}$  (376 MHz,  $\text{CDCl}_3$ )  $\delta$  -40.12 (s, 3F); **HRMS** (ESI) calcd for  $\text{C}_{16}\text{H}_{13}\text{F}_3\text{OSa}$   $[\text{M}+\text{Na}]^+$  333.0537, found 333.0533.

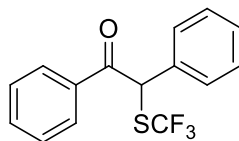

**3h**

**1,2-diphenyl-2-(trifluoromethylthio)ethanone (3h).**  $^1\text{H NMR}$  (600 MHz,  $\text{CDCl}_3$ )  $\delta$  7.98-7.92 (m, 2H), 7.58-7.51 (m, 1H), 7.48-7.39 (m, 4H), 7.38-7.26 (m, 3H), 6.12 (s, 1H);  $^{13}\text{C NMR}$  (150 MHz,  $\text{CDCl}_3$ )  $\delta$  193.23, 135.3, 134.4, 134.11, 130.7 (q,  $J_{\text{CF}} = 306.0$  Hz), 129.6, 129.3, 129.05, 129.01, 128.7, 56.4;  $^{19}\text{F NMR}$  (376 MHz,  $\text{CDCl}_3$ )  $\delta$  -40.03 (s, 3F); **HRMS** (ESI) calcd for  $\text{C}_{15}\text{H}_{11}\text{F}_3\text{OSNa}$   $[\text{M}+\text{Na}]^+$  319.0380, found 319.0376.

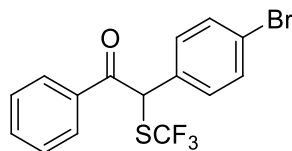

**3i**

**2-(4-bromophenyl)-1-phenyl-2-(trifluoromethylthio)ethanone (3i).**  $^1\text{H NMR}$  (600 MHz,  $\text{CDCl}_3$ )  $\delta$  7.95-7.89 (m, 2H), 7.61-7.54 (m, 1H), 7.51-7.41 (m, 4H), 7.35-7.30 (m, 2H), 6.08 (s, 1H);  $^{13}\text{C NMR}$  (150 MHz,  $\text{CDCl}_3$ )  $\delta$  192.9, 134.6, 134.4, 134.1, 132.8, 130.6 (q,  $J_{CF} = 306.0$  Hz), 130.3, 129.2, 129.1, 123.4, 55.7;  $^{19}\text{F NMR}$  (376 MHz,  $\text{CDCl}_3$ )  $\delta$  -39.91 (s, 3F); **HRMS** (ESI) calcd for  $\text{C}_{15}\text{H}_{10}\text{BrF}_3\text{OS}$   $[\text{M}+\text{Na}]^+$  396.9486, found 396.9480.

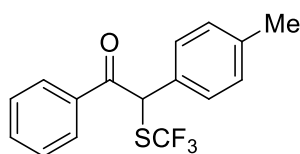

**3j**

**1-phenyl-2-p-tolyl-2-(trifluoromethylthio)ethanone (3j).**  $^1\text{H NMR}$  (600 MHz,  $\text{CDCl}_3$ )  $\delta$  7.98-7.91 (m, 2H), 7.57-7.50 (m, 1H), 7.45-7.39 (m, 2H), 7.35-7.30 (m, 2H), 7.18-7.12 (m, 2H), 6.10 (s, 1H), 2.30 (s, 3H);  $^{13}\text{C NMR}$  (150 MHz,  $\text{CDCl}_3$ )  $\delta$  193.3, 139.1, 134.5, 134.0, 132.3, 132.2, 130.7 (q,  $J_{CF} = 306.0$  Hz), 129.3, 129.0, 128.6, 56.3, 21.3;  $^{19}\text{F NMR}$  (376 MHz,  $\text{CDCl}_3$ )  $\delta$  -40.04 (s, 3F); **HRMS** (ESI) calcd for  $\text{C}_{16}\text{H}_{13}\text{F}_3\text{OSNa}$   $[\text{M}+\text{Na}]^+$  333.0537, found 333.0533.

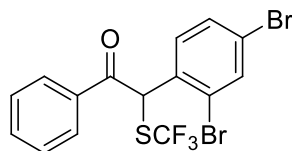

**3k**

**2-(2,4-dibromophenyl)-1-phenyl-2-(trifluoromethylthio)ethanone (3k).**  $^1\text{H NMR}$  (600 MHz,  $\text{CDCl}_3$ )  $\delta$  8.04-7.97 (m, 2H), 7.77 (d,  $J = 2.9$  Hz, 1H), 7.63-7.56 (m, 1H), 7.50-7.40 (m, 3H), 7.39-7.35 (m, 1H), 6.57 (s, 1H);  $^{13}\text{C NMR}$  (150 MHz,  $\text{CDCl}_3$ )  $\delta$  192.7, 136.1, 134.6, 134.1, 133.9, 132.0, 131.6, 130.2 (q,  $J_{CF} = 306.0$  Hz), 129.2, 129.1, 124.6, 123.8, 53.9;  $^{19}\text{F NMR}$  (376 MHz,  $\text{CDCl}_3$ )  $\delta$  -40.03 (s, 3F); **HRMS** (ESI) calcd for  $\text{C}_{15}\text{H}_9\text{Br}_2\text{F}_3\text{OSNa}$   $[\text{M}+\text{Na}]^+$  474.8591, found 474.8587.

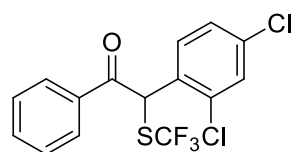

**3l**

**2-(2,4-dichlorophenyl)-1-phenyl-2-(trifluoromethylthio)ethanone (3l).**  $^1\text{H NMR}$  (600 MHz,  $\text{CDCl}_3$ )  $\delta$  8.01-7.96 (m, 2H), 7.62-7.56 (m, 1H), 7.50-7.42 (m, 4H), 7.25-7.22 (m, 1H), 6.60 (s, 1H);  $^{13}\text{C NMR}$  (150 MHz,  $\text{CDCl}_3$ )  $\delta$  192.8, 135.8, 134.6, 134.0, 134.0, 132.0, 131.2, 130.3 (q,  $J_{CF} = 306.0$  Hz), 130.2, 129.2, 129.1, 128.6, 51.4;  $^{19}\text{F NMR}$  (376 MHz,  $\text{CDCl}_3$ )  $\delta$  -40.17 (s, 3F); **HRMS** (ESI) calcd for  $\text{C}_{15}\text{H}_9\text{Cl}_2\text{F}_3\text{OSNa}$   $[\text{M}+\text{Na}]^+$  386.9601, found 386.9597.

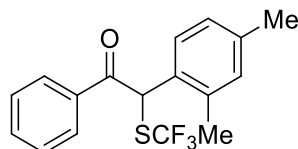

**3m**

**2-(2,4-dimethylphenyl)-1-phenyl-2-(trifluoromethylthio)ethanone (3m).**  $^1\text{H NMR}$  (400 MHz,  $\text{CDCl}_3$ )  $\delta$  7.83 (d,  $J = 4.0$  Hz, 2H), 7.52 (t,  $J = 4.0$  Hz, 1H), 7.40 (t,  $J = 4.0$  Hz, 2H), 7.12 (d,  $J = 4.0$  Hz, 1H), 7.05 (s, 1H), 6.95 (d,  $J = 4.0$  Hz, 1H), 6.19 (s, 1H), 2.54 (s, 3H), 2.26 (s, 3H);  $^{13}\text{C NMR}$  (150 MHz,  $\text{CDCl}_3$ )  $\delta$  193.6, 139.3, 135.9, 135.1, 133.8, 132.6, 130.5 (q,  $J_{CF} = 307.5$  Hz), 129.0, 128.8, 128.7, 128.6, 52.8, 21.2, 19.4;  $^{19}\text{F NMR}$  (376 MHz,  $\text{CDCl}_3$ )  $\delta$  -40.77 (s, 3F); **HRMS** (ESI) calcd for  $\text{C}_{17}\text{H}_{15}\text{F}_3\text{OSNa}$   $[\text{M}+\text{Na}]^+$  347.0693, found 347.0689.

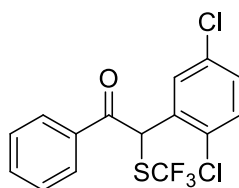

**3n**

**2-(2,5-dichlorophenyl)-1-phenyl-2-(trifluoromethylthio)ethanone (3n).**  $^1\text{H NMR}$  (600 MHz,  $\text{CDCl}_3$ )  $\delta$  8.01 (d,  $J = 6.0$  Hz, 2H), 7.60 (t,  $J = 6.0$  Hz, 1H), 7.52-7.45 (m, 3H), 7.36 (d,  $J = 6.0$  Hz, 1H), 7.24-7.20 (m, 1H), 6.59 (s, 1H);  $^{13}\text{C NMR}$  (150 MHz,  $\text{CDCl}_3$ )  $\delta$  192.6, 135.1, 134.7, 134.0, 134.0, 131.5, 131.4, 130.6, 130.30 (q,  $J_{CF} = 306.0$  Hz), 130.26, 129.2, 129.1, 51.5;  $^{19}\text{F NMR}$  (376 MHz,  $\text{CDCl}_3$ )  $\delta$  -40.21 (s, 3F); **HRMS** (ESI) calcd for  $\text{C}_{15}\text{H}_9\text{Cl}_2\text{F}_3\text{OSNa}$   $[\text{M}+\text{Na}]^+$  386.9601, found 386.9597.

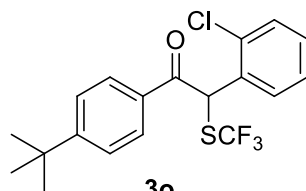

**3o**

**1-(4-tert-butylphenyl)-2-(2-chlorophenyl)-2-(trifluoromethylthio)ethanone (3o).**  $^1\text{H NMR}$  (600 MHz,  $\text{CDCl}_3$ )  $\delta$  7.98-7.93 (m, 2H), 7.52-7.40 (m, 4H), 7.27-7.20 (m, 2H), 6.65 (s, 1H); 1.30

(s, 9H);  $^{13}\text{C}$  NMR (150 MHz,  $\text{CDCl}_3$ )  $\delta$  192.5, 158.4, 133.4, 133.3, 131.6, 130.5 (q,  $J_{\text{CF}} = 306.0$  Hz), 130.4, 130.29, 130.27, 129.12, 129.08, 126.1, 51.9, 35.4, 31.1;  $^{19}\text{F}$  NMR (376 MHz,  $\text{CDCl}_3$ )  $\delta$  -40.31 (s, 3F); HRMS (ESI) calcd for  $\text{C}_{19}\text{H}_{19}\text{ClF}_3\text{OS}$   $[\text{M}+\text{H}]^+$  387.0797, found 387.0794.

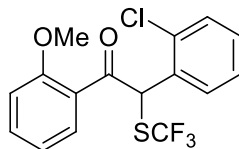

**3p**

**2-(2-chlorophenyl)-1-(2-methoxyphenyl)-2-(trifluoromethylthio)ethanone (3p).**  $^1\text{H}$  NMR (400 MHz,  $\text{CDCl}_3$ )  $\delta$  7.60 (dd,  $J = 6.0, 8.0$  Hz, 1H), 7.48-7.32 (m, 3H), 7.25-7.17 (m, 2H), 6.98-6.92 (m, 1H), 6.90 (d,  $J = 8.0$  Hz, 1H), 6.83 (s, 1H), 3.88 (s, 3H);  $^{13}\text{C}$  NMR (150 MHz,  $\text{CDCl}_3$ )  $\delta$  195.1, 158.3, 134.6, 134.4, 133.0, 131.6, 130.50 (q,  $J_{\text{CF}} = 306.0$  Hz), 130.50, 130.2, 130.0, 127.5, 126.0, 121.0, 111.5, 55.7, 55.1;  $^{19}\text{F}$  NMR (376 MHz,  $\text{CDCl}_3$ )  $\delta$  -40.59 (s, 3F); HRMS (ESI) calcd for  $\text{C}_{16}\text{H}_{13}\text{ClF}_3\text{O}_2\text{S}$   $[\text{M}+\text{H}]^+$  361.0277, found 361.0274.

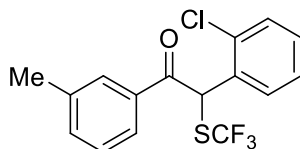

**3q**

**2-(2-chlorophenyl)-1-*m*-tolyl-2-(trifluoromethylthio)ethanone (3q).**  $^1\text{H}$  NMR (600 MHz,  $\text{CDCl}_3$ )  $\delta$  7.83 (s, 1H), 7.80 (d,  $J = 6.0$  Hz, 1H), 7.49-7.45 (m, 1H), 7.44-7.40 (m, 1H), 7.39-7.36 (m, 1H), 7.32 (t,  $J = 6.0$  Hz, 1H), 7.25-7.21 (m, 2H), 6.65 (s, 1H), 2.38 (s, 3H);  $^{13}\text{C}$  NMR (150 MHz,  $\text{CDCl}_3$ )  $\delta$  193.3, 139.0, 135.2, 134.2, 133.33, 133.29, 130.4, 130.3, 130.2, 129.7, 128.9, 128.1, 126.2, 52.1, 21.4;  $^{19}\text{F}$  NMR (376 MHz,  $\text{CDCl}_3$ )  $\delta$  -40.26 (s, 3F); HRMS (ESI) calcd for  $\text{C}_{16}\text{H}_{13}\text{ClF}_3\text{OS}$   $[\text{M}+\text{H}]^+$  345.0328, found 345.0325.

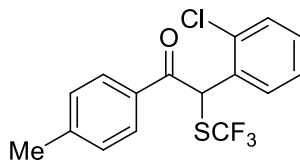

**3r**

**2-(2-chlorophenyl)-1-*p*-tolyl-2-(trifluoromethylthio)ethanone (3r).**  $^1\text{H}$  NMR (400 MHz,  $\text{CDCl}_3$ )  $\delta$  7.95-7.87 (m, 2H), 7.50-7.44 (m, 1H), 7.43-7.38 (m, 1H), 7.27-7.20 (m, 4H), 6.63 (s, 1H), 2.37 (s, 3H);  $^{13}\text{C}$  NMR (150 MHz,  $\text{CDCl}_3$ )  $\delta$  192.67, 145.6, 133.4, 133.3, 131.7, 130.5 (q,  $J_{\text{CF}} = 306.0$  Hz), 130.4, 130.3, 130.2, 129.8, 129.2, 128.1, 52.0, 21.9;  $^{19}\text{F}$  NMR (376 MHz,  $\text{CDCl}_3$ )  $\delta$  -40.26 (s, 3F); HRMS (ESI) calcd for  $\text{C}_{16}\text{H}_{13}\text{ClF}_3\text{OS}$   $[\text{M}+\text{H}]^+$  345.0328, found 345.0326.

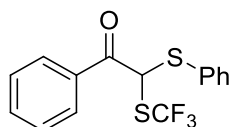

**3s**

**1-phenyl-2-(phenylthio)-2-(trifluoromethylthio)ethanone (3s).**  $^1\text{H NMR}$  (400 MHz,  $\text{CDCl}_3$ )  $\delta$  8.01-7.94 (m, 2H), 7.68-7.60 (m, 1H), 7.54-7.47 (m, 2H), 7.42-7.36 (m, 3H), 7.35-7.30 (m, 2H), 6.03 (s, 1H);  $^{13}\text{C NMR}$  (150 MHz,  $\text{CDCl}_3$ )  $\delta$  189.6, 135.9, 134.3, 133.6, 130.4, 130.2 (q,  $J_{\text{CF}} = 307.5$  Hz), 129.4, 129.3, 129.1, 129.0, 57.3;  $^{19}\text{F NMR}$  (376 MHz,  $\text{CDCl}_3$ )  $\delta$  -39.96 (s, 3F); **HRMS** (ESI) calcd for  $\text{C}_{15}\text{H}_{11}\text{F}_3\text{OS}_2\text{Na}$   $[\text{M}+\text{Na}]^+$  351.0101, found 351.0098.

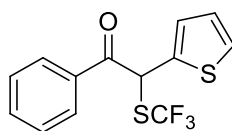

**3t**

**1-phenyl-2-(thiophen-2-yl)-2-(trifluoromethylthio)ethanone (3t).**  $^1\text{H NMR}$  (400 MHz,  $\text{CDCl}_3$ )  $\delta$  8.02-7.95 (m, 2H), 7.59 (t,  $J = 8.0$  Hz, 1H), 7.47 (t,  $J = 8.0$  Hz, 2H), 7.33 (d,  $J = 4.0$  Hz, 1H), 7.14 (d,  $J = 4.0$  Hz, 1H), 6.97-6.93 (m, 1H), 6.41 (m, 1H);  $^{13}\text{C NMR}$  (150 MHz,  $\text{CDCl}_3$ )  $\delta$  192.2, 136.9, 134.4, 134.1, 130.3 (q,  $J_{\text{CF}} = 307.5$  Hz), 129.3, 129.1, 128.6, 128.0, 127.6, 50.6;  $^{19}\text{F NMR}$  (376 MHz,  $\text{CDCl}_3$ )  $\delta$  -40.26 (s, 3F); **HRMS** (ESI) calcd for  $\text{C}_{13}\text{H}_9\text{F}_3\text{OS}_2\text{Na}$   $[\text{M}+\text{Na}]^+$  324.9945, found 324.9941.

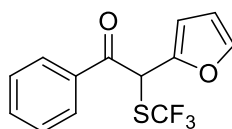

**3u**

**2-(furan-2-yl)-1-phenyl-2-(trifluoromethylthio)ethanone (3u).**  $^1\text{H NMR}$  (400 MHz,  $\text{CDCl}_3$ )  $\delta$  7.98-7.92 (m, 2H), 7.63-7.55 (m, 1H), 7.50-7.43 (m, 2H), 7.42-7.40 (m, 1H), 6.44 (d,  $J = 4.0$  Hz, 1H), 6.38-6.34 (m, 1H), 6.24 (s, 1H);  $^{13}\text{C NMR}$  (125 MHz,  $\text{CDCl}_3$ )  $\delta$  190.6, 147.4, 144.0, 134.4, 130.5 (q,  $J_{\text{CF}} = 307.5$  Hz), 129.2, 129.1, 111.7, 110.8, 50.0;  $^{19}\text{F NMR}$  (376 MHz,  $\text{CDCl}_3$ )  $\delta$  -40.27 (s, 3F); **HRMS** (ESI) calcd for  $\text{C}_{13}\text{H}_9\text{F}_3\text{O}_2\text{SNa}$   $[\text{M}+\text{Na}]^+$  309.0173, found 309.0169.

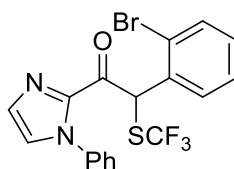

**3v**

**2-(2-bromophenyl)-1-(1-phenyl-1*H*-imidazol-2-yl)-2-(trifluoromethylthio)ethanone (3v).**  $^1\text{H}$  NMR (400 MHz,  $\text{CDCl}_3$ )  $\delta$  7.62 (dd,  $J = 1.2, 8.0$  Hz, 1H), 7.51 (dd,  $J = 1.2, 8.0$  Hz, 1H), 7.49-7.44 (m, 3H), 7.33 (d,  $J = 1.2$  Hz, 1H), 7.30-7.20 (m, 4H), 7.18-7.13 (m, 1H);  $^{13}\text{C}$  NMR (150 MHz,  $\text{CDCl}_3$ )  $\delta$  183.1, 141.1, 137.8, 134.3, 133.8, 131.0, 130.5, 130.2, 130.2 (q,  $J_{\text{CF}} = 307.5$  Hz), 129.3, 129.2, 129.5, 128.0, 125.8, 125.0, 52.9;  $^{19}\text{F}$  NMR (376 MHz,  $\text{CDCl}_3$ )  $\delta$  -40.45 (s, 3F); HRMS (ESI) calcd for  $\text{C}_{18}\text{H}_{13}\text{BrF}_3\text{N}_2\text{OS}$   $[\text{M}+\text{H}]^+$  440.9884, found 440.9880.

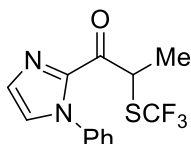

**3w**

**1-(1-phenyl-1*H*-imidazol-2-yl)-2-(trifluoromethylthio)propan-1-one (3w).**  $^1\text{H}$  NMR (400 MHz,  $\text{CDCl}_3$ )  $\delta$  7.51-7.45 (m, 1H), 7.33 (d,  $J = 1.2$  Hz, 1H), 7.30-7.25 (m, 3H), 5.39 (d,  $J = 8.0, 16.0$  Hz, 1H), 1.69 (d,  $J = 8.0$  Hz, 3H);  $^{13}\text{C}$  NMR (150 MHz,  $\text{CDCl}_3$ )  $\delta$  187.1, 140.8, 137.9, 130.8 (q,  $J_{\text{CF}} = 306.0$  Hz), 130.5, 129.3, 129.2, 128.3, 125.8, 44.8, 19.1;  $^{19}\text{F}$  NMR (376 MHz,  $\text{CDCl}_3$ )  $\delta$  -39.61 (s, 3F); HRMS (ESI) calcd for  $\text{C}_{13}\text{H}_{12}\text{F}_3\text{N}_2\text{OS}$   $[\text{M}+\text{H}]^+$  301.0622, found 301.0616.

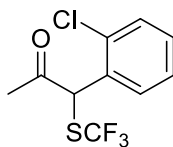

**3x**

**1-(2-chlorophenyl)-1-(trifluoromethylthio)propan-2-one (3x).**  $^1\text{H}$  NMR (400 MHz,  $\text{CDCl}_3$ )  $\delta$  7.49-7.44 (m, 1H), 7.43-7.38 (m, 1H), 7.35-7.29 (m, 2H), 5.82 (s, 1H), 2.21 (s, 3H);  $^{13}\text{C}$  NMR (150 MHz,  $\text{CDCl}_3$ )  $\delta$  200.0, 133.9, 133.0, 130.5, 130.40 (q,  $J_{\text{CF}} = 306.0$  Hz), 130.37, 130.2, 128.1, 56.7, 28.0;  $^{19}\text{F}$  NMR (376 MHz,  $\text{CDCl}_3$ )  $\delta$  -40.23 (s, 3F); HRMS (ESI) calcd for  $\text{C}_{10}\text{H}_8\text{F}_3\text{OSNa}$   $[\text{M}+\text{Na}]^+$  290.9834, found 290.9830.

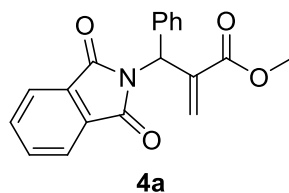

**methyl 2-((1,3-dioxisoindolin-2-yl)(phenyl)methyl)acrylate (4a).**  $^1\text{H NMR}$  (400 MHz,  $\text{CDCl}_3$ )  $\delta$  7.87-7.80 (m, 2H), 7.75-7.67 (m, 2H), 7.47-7.41 (m, 2H), 7.39-7.27 (m, 3H), 6.57 (d,  $J = 4.0$  Hz, 1H), 6.41-6.38 (m, 1H), 5.63 (d,  $J = 1.2$  Hz, 1H), 3.70 (s, 3H);  $^{13}\text{C NMR}$  (150 MHz,  $\text{CDCl}_3$ )  $\delta$  168.1, 166.2, 137.7, 137.1, 134.2, 131.9, 129.8, 128.8, 128.2, 123.5, 54.8, 52.3; **HRMS** (ESI) calcd for  $\text{C}_{19}\text{H}_{16}\text{NO}_4$   $[\text{M}+\text{H}]^+$  322.1079, found 322.1075.

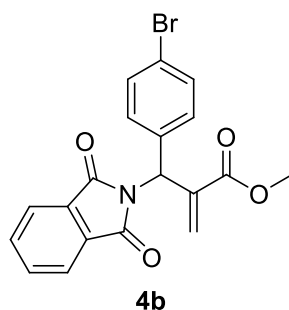

$^1\text{H NMR}$  400 MHz

**methyl 2-((4-bromophenyl)(1,3-dioxisoindolin-2-yl)methyl)acrylate (4b).**  $^1\text{H NMR}$  (400 MHz,  $\text{CDCl}_3$ )  $\delta$  7.87-7.80 (m, 2H), 7.76-7.69 (m, 2H), 7.51-7.45 (m, 2H), 7.35-7.29 (m, 2H), 6.57 (d,  $J = 1.2$  Hz, 1H), 6.41-6.38 (m, 1H), 5.64 (d,  $J = 1.2$  Hz, 1H), 3.70 (s, 3H);  $^{13}\text{C NMR}$  (150 MHz,  $\text{CDCl}_3$ )  $\delta$  167.9, 166.0, 137.2, 136.2, 134.4, 132.0, 131.8, 130.6, 129.7, 123.7, 122.4, 54.2, 52.4; **HRMS** (ESI) calcd for  $\text{C}_{19}\text{H}_{15}\text{BrNO}_4$   $[\text{M}+\text{H}]^+$  400.0184, found 400.0180.

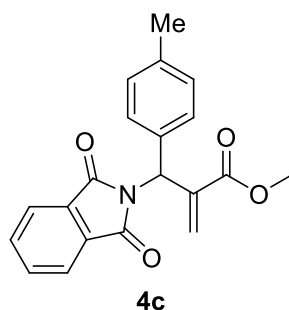

**methyl 2-((1,3-dioxisoindolin-2-yl)(p-tolyl)methyl)acrylate (4c).**  $^1\text{H NMR}$  (400 MHz,  $\text{CDCl}_3$ )  $\delta$  7.86-7.78 (m, 2H), 7.74-7.66 (m, 2H), 7.36-7.30 (m, 2H), 7.18-7.12 (m, 2H), 6.55 (d,  $J = 4.0$  Hz,

1H), 6.38-6.33 (m, 1H), 5.64 (d,  $J = 1.2$  Hz, 1H), 3.70 (s, 3H), 2.33 (s, 3H);  $^{13}\text{C}$  NMR (150 MHz,  $\text{CDCl}_3$ )  $\delta$  168.1, 166.3, 138.0, 137.8, 134.2, 132.0, 129.5, 129.5, 128.7, 123.5, 54.6, 52.3, 21.3; HRMS (ESI) calcd for  $\text{C}_{20}\text{H}_{18}\text{NO}_4$   $[\text{M}+\text{H}]^+$  336.1236, found 336.1231.

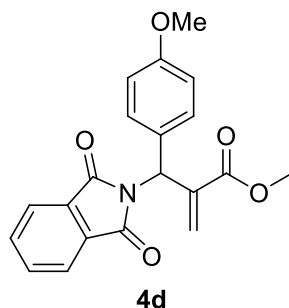

**methyl 2-((1,3-dioxisoindolin-2-yl)(4-methoxyphenyl)methyl)acrylate (4d).**  $^1\text{H}$  NMR (400 MHz,  $\text{CDCl}_3$ )  $\delta$  7.86-7.79 (m, 2H), 7.74-7.66 (m, 2H), 7.41-7.35 (m, 2H), 6.90-6.84 (m, 2H), 6.54 (d,  $J = 4.0$  Hz, 1H), 6.35-6.32 (m, 1H), 5.65 (d,  $J = 4.0$  Hz, 1H), 3.79 (s, 3H), 3.69 (s, 3H);  $^{13}\text{C}$  NMR (150 MHz,  $\text{CDCl}_3$ )  $\delta$  168.1, 166.3, 159.5, 138.0, 134.2, 132.0, 130.2, 129.3, 129.2, 123.5, 114.1, 55.4, 54.4, 52.3; HRMS (ESI) calcd for  $\text{C}_{20}\text{H}_{17}\text{NO}_5\text{Na}$   $[\text{M}+\text{Na}]^+$  374.1004, found 374.0999.

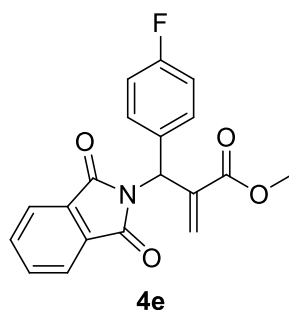

**methyl 2-((1,3-dioxisoindolin-2-yl)(4-fluorophenyl)methyl)acrylate (4e).**  $^1\text{H}$  NMR (400 MHz,  $\text{CDCl}_3$ )  $\delta$  7.87-7.79 (m, 2H), 7.75-7.69 (m, 2H), 7.47-7.40 (m, 2H), 7.08-6.98 (m, 2H), 6.56 (d,  $J = 1.2$  Hz, 1H), 6.40-6.36 (m, 1H), 5.63 (d,  $J = 1.2$  Hz, 1H), 3.70 (s, 3H);  $^{13}\text{C}$  NMR (150 MHz,  $\text{CDCl}_3$ )  $\delta$  168.0, 166.1, 162.6 (d,  $J_{\text{CF}} = 246.0$  Hz), 137.6, 134.3, 132.9 (d,  $J_{\text{CF}} = 3.0$  Hz), 131.9, 130.7 (d,  $J_{\text{CF}} = 9.0$  Hz), 129.4, 123.6, 115.7 (d,  $J_{\text{CF}} = 22.5$  Hz), 54.1, 52.4; HRMS (ESI) calcd for  $\text{C}_{19}\text{H}_{15}\text{FO}_4$   $[\text{M}+\text{H}]^+$  340.0985, found 340.0978.



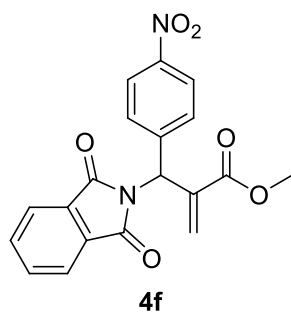

**methyl 2-((1,3-dioxoisindolin-2-yl)(4-nitrophenyl)methyl)acrylate (4f).**  $^1\text{H NMR}$  (400 MHz,  $\text{CDCl}_3$ )  $\delta$  8.24-8.18 (m, 2H), 7.89-7.83 (m, 2H), 7.79-7.73 (m, 2H), 7.64-7.59 (m, 2H), 6.64 (d,  $J = 1.2$  Hz, 1H), 6.55-6.50 (m, 1H), 5.68 (d,  $J = 4.0$  Hz, 1H), 3.73 (s, 3H);  $^{13}\text{C NMR}$  (150 MHz,  $\text{CDCl}_3$ )  $\delta$  167.8, 165.7, 147.8, 144.2, 136.5, 134.6, 134.5, 131.7, 130.0, 129.8, 124.0, 123.8, 123.7, 53.9, 52.6; **HRMS** (ESI) calcd for  $\text{C}_{19}\text{H}_{14}\text{N}_2\text{O}_6$   $[\text{M}+\text{H}]^+$  367.0930, found 367.0926.

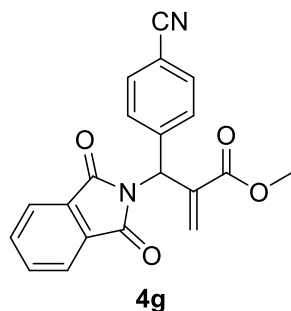

**methyl 2-((4-cyanophenyl)(1,3-dioxoisindolin-2-yl)methyl)acrylate (4g).**  $^1\text{H NMR}$  (400 MHz,  $\text{CDCl}_3$ )  $\delta$  7.89-7.83 (m, 2H), 7.78-7.72 (m, 2H), 7.68-7.63 (m, 2H), 7.58-7.53 (m, 2H), 6.62 (d,  $J = 1.2$  Hz, 1H), 6.48-6.45 (m, 1H), 5.65 (d,  $J = 1.2$  Hz, 1H), 3.72 (s, 3H);  $^{13}\text{C NMR}$  (150 MHz,  $\text{CDCl}_3$ )  $\delta$  167.8, 165.8, 142.3, 136.6, 134.5, 132.6, 131.7, 130.0, 129.6, 123.8, 118.6, 112.3, 54.1, 52.5; **HRMS** (ESI) calcd for  $\text{C}_{20}\text{H}_{15}\text{N}_2\text{O}_4$   $[\text{M}+\text{H}]^+$  347.1032, found 347.1024.

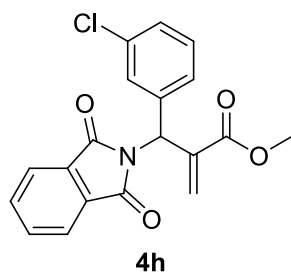

**methyl 2-((3-chlorophenyl)(1,3-dioxoisindolin-2-yl)methyl)acrylate (4h).**  $^1\text{H NMR}$  (600 MHz,  $\text{CDCl}_3$ )  $\delta$  7.88-7.81 (m, 2H), 7.76-7.70 (m, 2H), 7.43 (s, 1H), 7.36-7.26 (m, 3H), 6.59 (s, 1H), 6.37 (s, 1H), 5.66 (s, 1H), 3.71 (s, 3H);  $^{13}\text{C NMR}$  (150 MHz,  $\text{CDCl}_3$ )  $\delta$  167.9, 166.0, 139.1, 137.1,

134.7, 134.4, 131.9, 130.04, 130.0, 128.9, 128.6, 127.0, 123.7, 54.2, 52.4; **HRMS** (ESI) calcd for  $C_{19}H_{15}ClNO_4$   $[M+H]^+$  356.0690, found 356.0684.

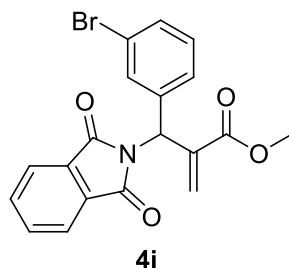

**methyl 2-((3-bromophenyl)(1,3-dioxisoindolin-2-yl)methyl)acrylate (4i).**  $^1H$  NMR (600 MHz,  $CDCl_3$ )  $\delta$  7.88-7.82 (m, 2H), 7.76-7.71 (m, 2H), 7.58 (s, 1H), 7.46-7.42 (m, 1H), 7.40-7.36 (m, 1H), 6.59 (s, 1H), 6.36 (s, 1H), 5.66 (d,  $J = 6.0$  Hz, 1H), 3.71 (s, 3H);  $^{13}C$  NMR (150 MHz,  $CDCl_3$ )  $\delta$  167.9, 166.0, 139.4, 137.1, 134.4, 131.83, 131.80, 131.5, 130.3, 130.0, 127.5, 123.7, 122.8, 54.1, 52.4; **HRMS** (ESI) calcd for  $C_{19}H_{15}BrNO_4$   $[M+H]^+$  400.0184, found 400.0179.

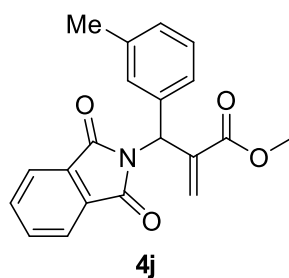

**methyl 2-((1,3-dioxisoindolin-2-yl)(*m*-tolyl)methyl)acrylate (4j).**  $^1H$  NMR (600 MHz,  $CDCl_3$ )  $\delta$  7.87-7.79 (m, 2H), 7.73-7.67 (m, 2H), 7.25-7.20 (m, 3H), 7.15-7.07 (m, 1H), 6.56 (d,  $J = 2.2$  Hz, 1H), 6.35 (t,  $J = 2.3$  Hz, 1H), 5.63 (d,  $J = 2.6$  Hz, 1H), 3.70 (s, 3H), 2.33 (s, 3H);  $^{13}C$  NMR (150 MHz,  $CDCl_3$ )  $\delta$  168.1, 166.2, 138.4, 137.7, 137.0, 134.1, 131.9, 129.7, 129.4, 129.0, 128.6, 125.79, 123.5, 54.7, 52.3, 21.5; **HRMS** (ESI) calcd for  $C_{20}H_{17}NO_5Na$   $[M+Na]^+$  374.1004, found 374.0999.

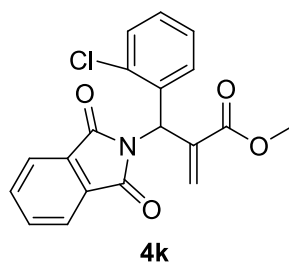

**methyl 2-((2-chlorophenyl)(1,3-dioxisoindolin-2-yl)methyl)acrylate (4k).**  $^1H$  NMR (400 MHz,  $CDCl_3$ )  $\delta$  7.87-7.81 (m, 2H), 7.76-7.70 (m, 2H), 7.54-7.48 (m, 1H), 7.42-7.35 (m, 1H), 7.29-7.23

(m, 2H), 6.76 (t,  $J = 1.2$  Hz, 1H), 6.59 (d,  $J = 1.3$  Hz, 1H), 5.60 (d,  $J = 1.7$  Hz, 1H), 3.71 (s, 3H);  $^{13}\text{C}$  NMR (150 MHz,  $\text{CDCl}_3$ )  $\delta$  167.9, 165.9, 136.4, 134.5, 134.3, 133.8, 131.8, 130.4, 129.9, 129.6, 129.0, 126.9, 123.7, 52.4, 52.1; HRMS (ESI) calcd for  $\text{C}_{19}\text{H}_{15}\text{ClNO}_4$   $[\text{M}+\text{H}]^+$  356.0690, found 356.0684.

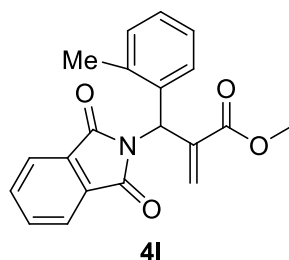

**methyl 2-((1,3-dioxoisindolin-2-yl)(*o*-tolyl)methyl)acrylate (4I).**  $^1\text{H}$  NMR (400 MHz,  $\text{CDCl}_3$ )  $\delta$  7.86-7.79 (m, 2H), 7.74-7.67 (m, 2H), 4.8-7.40 (m, 1H), 7.24-7.12 (m, 3H), 6.58-6.48 (m, 2H), 5.52 (d,  $J = 1.2$  Hz, 1H), 3.70 (s, 3H), 2.38 (s, 3H);  $^{13}\text{C}$  NMR (150 MHz,  $\text{CDCl}_3$ )  $\delta$  168.2, 166.2, 137.1, 136.2, 135.3, 134.2, 131.8, 130.7, 129.0, 128.6, 128.2, 126.3, 123.5, 52.3, 51.8, 19.4; HRMS (ESI) calcd for  $\text{C}_{20}\text{H}_{18}\text{NO}_4$   $[\text{M}+\text{H}]^+$  336.1236, found 336.1230.

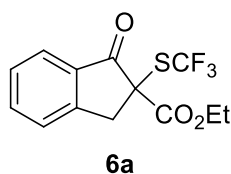

**ethyl 1-oxo-2-(trifluoromethylthio)-2,3-dihydro-1H-indene-2-carboxylate (6a).**  $^1\text{H}$  NMR (600 MHz,  $\text{CDCl}_3$ )  $\delta$  7.83 (d,  $J = 12.0$  Hz, 1H), 7.71 (t,  $J = 6.0$  Hz, 1H), 7.53 (d,  $J = 6.0$  Hz, 1H), 7.46 (t,  $J = 6.0$  Hz, 1H), 4.31-4.21 (m, 2H), 4.19 (d,  $J = 18.0$  Hz, 1H), 3.67 (d,  $J = 18.0$  Hz, 1H), 1.26 (s, 3H);  $^{13}\text{C}$  NMR (150 MHz,  $\text{CDCl}_3$ )  $\delta$  195.1, 166.9, 151.9, 36.6, 133.04, 129.99 (q,  $J_{\text{CF}} = 307.5$  Hz), 128.6, 126.4, 125.8, 63.8, 63.6, 40.5, 13.9;  $^{19}\text{F}$  NMR (376 MHz,  $\text{CDCl}_3$ )  $\delta$  -37.09 (s, 3F); HRMS (ESI) calcd for  $\text{C}_{13}\text{H}_{12}\text{F}_3\text{O}_3\text{S}$   $[\text{M}+\text{H}]^+$  305.0459, found 305.0455.

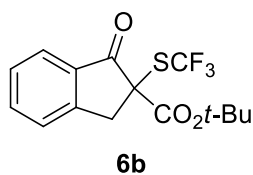

**tert-butyl 1-oxo-2-(trifluoromethylthio)-2,3-dihydro-1H-indene-2-carboxylate (6b).**  $^1\text{H}$  NMR (600 MHz,  $\text{CDCl}_3$ )  $\delta$  7.83 (d,  $J = 6.0$  Hz, 1H), 7.69 (t,  $J = 6.0$  Hz, 1H), 7.51 (d,  $J = 6.0$  Hz, 1H),

7.45 (t,  $J = 6.0$  Hz, 1H), 4.09 (d,  $J = 18.0$  Hz, 1H), 3.64 (d,  $J = 18.0$  Hz, 1H), 1.42 (s, 9H);  $^{13}\text{C}$  NMR (150 MHz,  $\text{CDCl}_3$ )  $\delta$  195.7, 165.8, 151.9, 136.4, 133.3, 130.1 (q,  $J_{\text{CF}} = 306.0$  Hz), 128.5, 126.3, 125.7, 85.0, 64.4, 40.6, 27.7;  $^{19}\text{F}$  NMR (376 MHz,  $\text{CDCl}_3$ )  $\delta$  -36.92 (s, 3F); HRMS (ESI) calcd for  $\text{C}_{15}\text{H}_{15}\text{F}_3\text{O}_3\text{SNa}$   $[\text{M}+\text{Na}]^+$  355.0592, found 355.0587.

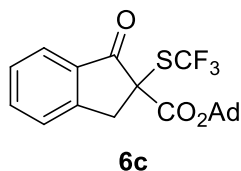

**adamantan-1-yl-1-oxo-2-((trifluoromethyl)thio)-2,3-dihydro-1H-indene-2-carboxylate (3d).**  $^1\text{H}$  NMR (600 MHz,  $\text{CDCl}_3$ )  $\delta$  7.83 (d,  $J = 6.0$  Hz, 1H), 7.68 (t,  $J = 12.0$  Hz, 1H), 7.50 (d,  $J = 12.0$  Hz, 1H), 7.44 (t,  $J = 12.0$  Hz, 1H), 4.08 (d,  $J = 18.0$  Hz, 2H), 3.64 (d,  $J = 18.0$  Hz, 1H), 2.14 (s, 3H), 2.04 (s, 6H), 1.62 (s, 6H);  $^{13}\text{C}$  NMR (150 MHz,  $\text{CDCl}_3$ )  $\delta$  195.8, 165.4, 151.9, 136.3, 133.4, 128.4, 126.2, 130.1 (q,  $J_{\text{CF}} = 307.5$  Hz), 125.6, 85.0, 64.5, 40.9, 40.6, 36.0, 31.0;  $^{19}\text{F}$  NMR (376 MHz,  $\text{CDCl}_3$ )  $\delta$  -36.85 (s, 3F); HRMS (ESI) calcd for  $\text{C}_{21}\text{H}_{21}\text{F}_3\text{O}_3\text{SNa}$   $[\text{M}+\text{Na}]^+$  433.1061, found 433.1058.

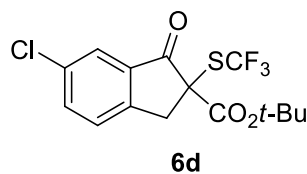

**tert-butyl 6-chloro-1-oxo-2-(trifluoromethylthio)-2,3-dihydro-1H-indene-2-carboxylate (6d).**  $^1\text{H}$  NMR (600 MHz,  $\text{CDCl}_3$ )  $\delta$  7.79 (s, 1H), 7.65 (d,  $J = 6.0$  Hz, 1H), 7.46 (d,  $J = 6.0$  Hz, 1H), 4.04 (d,  $J = 18.0$  Hz, 2H), 3.60 (d,  $J = 18.0$  Hz, 1H), 1.42 (s, 9H);  $^{13}\text{C}$  NMR (150 MHz,  $\text{CDCl}_3$ )  $\delta$  194.6, 165.3, 149.9, 136.4, 134.9, 134.8, 129.9 (q,  $J_{\text{CF}} = 307.5$  Hz), 127.5, 125.3, 85.4, 64.7, 40.1, 27.7;  $^{19}\text{F}$  NMR (376 MHz,  $\text{CDCl}_3$ )  $\delta$  -36.86 (s, 3F); HRMS (ESI) calcd for  $\text{C}_{15}\text{H}_{14}\text{ClF}_3\text{OSNa}$   $[\text{M}+\text{Na}]^+$  389.0202, found 389.0198.

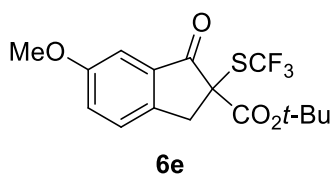

**tert-butyl 6-methoxy-1-oxo-2-(trifluoromethylthio)-2,3-dihydro-1H-indene-2-carboxylate (6e).**

**<sup>1</sup>H NMR** (600 MHz, CDCl<sub>3</sub>) δ 7.39 (d, *J* = 6.0 Hz, 1H), 7.29-7.25 (m, 1H), 7.24-7.21 (m, 1H), 3.98 (d, *J* = 12.0 Hz, 2H), 3.85 (s, 3H), 3.56 (d, *J* = 18.0 Hz, 1H), 1.42 (s, 9H); **<sup>13</sup>C NMR** (150 MHz, CDCl<sub>3</sub>) δ 195.7, 165.8, 160.1, 144.8, 134.6, 130.0 (q, *J*<sub>CF</sub> = 307.5 Hz), 127.0, 126.0, 160.5, 85.0, 65.0, 55.8, 40.0, 27.7; **<sup>19</sup>F NMR** (376 MHz, CDCl<sub>3</sub>) δ -36.96 (s, 3F); **HRMS** (ESI) calcd for C<sub>16</sub>H<sub>17</sub>F<sub>3</sub>O<sub>4</sub>SNa [M+Na]<sup>+</sup> 385.0697, Found 385.0695.

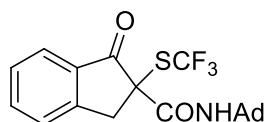

**6f**

**adamantan-1-yl-1-oxo-2-((trifluoromethyl)thio)-2,3-dihydro-1H-indene-2-carboxamide (6f).**

**<sup>1</sup>H NMR** (600 MHz, CDCl<sub>3</sub>) δ 7.77 (d, *J* = 12.0 Hz, 1H), 7.69 (t, *J* = 6.0 Hz, 1H), 7.52 (d, *J* = 6.0 Hz, 1H), 7.42 (t, *J* = 6.0 Hz, 1H), 6.73 (s, 1H), 4.50 (d, *J* = 18.0 Hz, 1H), 3.48 (d, *J* = 18.0 Hz, 1H), 2.07 (s, 3H), 1.98 (d, *J* = 6.0 Hz, 6H), 1.66 (s, 6H); **<sup>13</sup>C NMR** (150 MHz, CDCl<sub>3</sub>) δ 198.6, 162.8, 153.5, 136.9, 132.7, 129.8 (q, *J*<sub>CF</sub> = 309.0 Hz), 128.3, 126.5, 125.5, 63.1, 53.0, 41.0, 38.8, 36.4, 29.5; **<sup>19</sup>F NMR** (376 MHz, CDCl<sub>3</sub>) δ -37.29 (s, 3F); **HRMS** (ESI) calcd for C<sub>21</sub>H<sub>23</sub>F<sub>3</sub>NO<sub>2</sub>S [M+H]<sup>+</sup> 410.1402, found 410.1395.

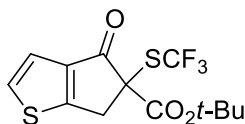

**6g**

**tert-butyl**

**4-oxo-5-(trifluoromethylthio)-5,6-dihydro-4H-cyclopenta[b]thiophene-5-carboxylate (6g).** **<sup>1</sup>H NMR** (600 MHz, CDCl<sub>3</sub>) δ 7.41 (d, *J* = 5.2 Hz, 1H), 7.20 (t, *J* = 6.0 Hz, 1H), 4.16 (d, *J* = 18.0 Hz, 1H), 3.70 (d, *J* = 18.0 Hz, 1H), 1.45 (s, 9H); **<sup>13</sup>C NMR** (150 MHz, CDCl<sub>3</sub>) δ 186.8, 168.5, 165.3, 141.8, 132.2, 130.0 (q, *J*<sub>CF</sub> = 307.5 Hz), 120.5, 85.3, 69.5, 38.9, 27.7; **<sup>19</sup>F NMR** (376 MHz, CDCl<sub>3</sub>) δ -37.28 (s, 3F); **HRMS** (ESI) calcd for C<sub>13</sub>H<sub>13</sub>F<sub>3</sub>O<sub>3</sub>S<sub>2</sub>Na [M+Na]<sup>+</sup> 361.0156, found 361.0151.

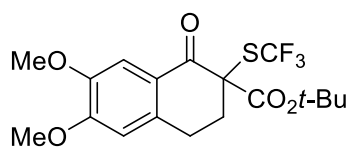

**6h**

**tert-butyl**

**6,7-dimethoxy-1-oxo-2-((trifluoromethyl)thio)-1,2,3,4-tetrahydronaphthalene-2-carboxylate**

**(6h).**  $^1\text{H NMR}$  (600 MHz,  $\text{CDCl}_3$ )  $\delta$  7.46 (s, 1H), 6.64 (s, 1H), 3.94 (s, 3H), 3.91 (s, 3H), 3.22-3.14 (m, 1H), 3.06-2.94 (m, 2H), 2.55-2.47 (m, 1H), 1.41 (s, 9H);  $^{13}\text{C NMR}$  (150 MHz,  $\text{CDCl}_3$ )  $\delta$  196.5, 188.4, 166.2, 154.6, 148.6, 137.7, 130.2 (q,  $J_{CF} = 306.0$  Hz), 123.9, 110.0, 109.4, 84.2, 65.1, 56.3, 56.2, 33.2, 27.7, 26.4;  $^{19}\text{F NMR}$  (376 MHz,  $\text{CDCl}_3$ )  $\delta$  -35.66 (s, 3F); **HRMS** (ESI) calcd for  $\text{C}_{18}\text{H}_{21}\text{F}_3\text{O}_5\text{SNa}$   $[\text{M}+\text{Na}]^+$  429.0959, found 429.0957.

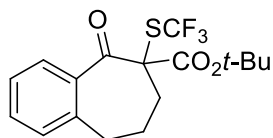

**6i**

*tert*-butyl

**5-oxo-6-(trifluoromethylthio)-6,7,8,9-tetrahydro-5H-benzo[7]annulene-6-carboxylate (6i).**  $^1\text{H NMR}$  (600 MHz,  $\text{CDCl}_3$ )  $\delta$  7.51 (d,  $J = 6.0$  Hz, 1H), 7.41-7.36 (m, 1H), 7.31-7.26 (m, 1H), 7.18 (d,  $J = 6.0$  Hz, 1H), 3.15-3.05 (m, 2H), 2.97-2.89 (m, 1H), .45-2.35 (m, 1H), 2.25-2.15 (m, 1H), 1.97-1.88 (m, 1H), 1.12 (s, 9H);  $^{13}\text{C NMR}$  (150 MHz,  $\text{CDCl}_3$ )  $\delta$  197.8, 166.6, 140.7, 137.6, 131.8, 130.6, 130.4 (q,  $J_{CF} = 306.0$  Hz), 130.0, 126.3, 83.9, 70.2, 36.3, 33.6, 27.1, 25.7;  $^{19}\text{F NMR}$  (376 MHz,  $\text{CDCl}_3$ )  $\delta$  -36.46 (s, 3F); **HRMS** (ESI) calcd for  $\text{C}_{17}\text{H}_{19}\text{F}_3\text{O}_3\text{SNa}$   $[\text{M}+\text{Na}]^+$  383.0905, found 383.0901.

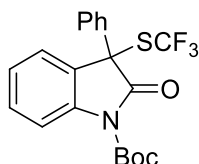

**6j**

***tert*-butyl 2-oxo-3-phenyl-3-(trifluoromethylthio)indoline-1-carboxylate (6j).**  $^1\text{H NMR}$  (600 MHz,  $\text{CDCl}_3$ )  $\delta$  7.97 (d,  $J = 12.0$  Hz, 1H), 7.57 (d,  $J = 6.0$  Hz, 1H), 7.54-7.49 (m, 2H), 7.46 (d,  $J = 12.0$  Hz, 1H), 7.40-4.30 (m, 4H), 1.62 (s, 9H);  $^{13}\text{C NMR}$  (150 MHz,  $\text{CDCl}_3$ )  $\delta$  172.5, 149.1, 139.4, 134.2, 130.5, 129.5, 129.3, 127.8, 129.1, 128.7 (q,  $J_{CF} = 309.0$  Hz), 126.2, 125.0, 115.8, 85.2, 59.7, 28.1;  $^{19}\text{F NMR}$  (376 MHz,  $\text{CDCl}_3$ )  $\delta$  -38.76 (s, 3F); **HRMS** (ESI) calcd for  $\text{C}_{20}\text{H}_{18}\text{F}_3\text{NO}_3\text{SNa}$   $[\text{M}+\text{Na}]^+$  432.0857, found 432.0853.

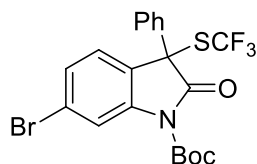

**6k**

**tert-butyl 6-bromo-2-oxo-3-phenyl-3-(trifluoromethylthio)indoline-1-carboxylate (6k).**  $^1\text{H}$  NMR (600 MHz,  $\text{CDCl}_3$ )  $\delta$  8.15 (s, 1H), 7.43-7.38 (m, 3H), 7.37-7.33 (m, 1H), 7.31-7.27 (m, 3H), 1.54 (s, 9H);  $^{13}\text{C}$  NMR (150 MHz,  $\text{CDCl}_3$ )  $\delta$  171.9, 148.8, 140.3, 133.6, 129.8, 129.4, 128.6 (q,  $J_{\text{CF}} = 309.0$  Hz), 128.2, 128.1, 127.7, 125.2, 124.4, 119.4, 85.8, 59.3, 28.1;  $^{19}\text{F}$  NMR (376 MHz,  $\text{CDCl}_3$ )  $\delta$  -38.66 (s, 3F); HRMS (ESI) calcd for  $\text{C}_{20}\text{H}_{17}\text{BrF}_3\text{NO}_3\text{SNa}$   $[\text{M}+\text{Na}]^+$  509.9962, found 509.9964.

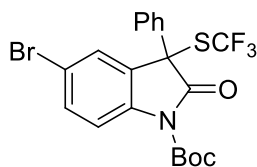

**6l**

**tert-butyl 5-bromo-2-oxo-3-phenyl-3-(trifluoromethylthio)indoline-1-carboxylate (6l).**  $^1\text{H}$  NMR (600 MHz,  $\text{CDCl}_3$ )  $\delta$  7.89 (d,  $J = 6.0$  Hz, 1H), 7.68 (d,  $J = 2.0$  Hz, 1H); 7.58 (dd,  $J = 2.1$ , 8.8 Hz, 1H), 7.51-7.47 (m, 1H), 7.42-7.37 (m, 1H), 1.61 (s, 9H);  $^{13}\text{C}$  NMR (150 MHz,  $\text{CDCl}_3$ )  $\delta$  171.7, 148.9, 138.4, 133.6, 129.8, 129.5, 128.6 (q,  $J_{\text{CF}} = 309.0$  Hz), 128.5, 127.7, 117.9, 117.6, 85.6, 59.3, 28.1;  $^{19}\text{F}$  NMR (376 MHz,  $\text{CDCl}_3$ )  $\delta$  -38.65 (s, 3F); HRMS (ESI) calcd for  $\text{C}_{20}\text{H}_{17}\text{BrF}_3\text{NO}_3\text{SNa}$   $[\text{M}+\text{Na}]^+$  509.9962, found 509.9960.

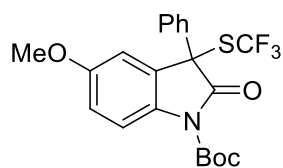

**6m**

**tert-butyl 5-methoxy-2-oxo-3-phenyl-3-(trifluoromethylthio)indoline-1-carboxylate (6m).**  $^1\text{H}$  NMR (600 MHz,  $\text{CDCl}_3$ )  $\delta$  7.90 (d,  $J = 6.0$  Hz, 1H), 7.55-7.49 (m, 2H), 7.39-7.33 (m, 3H), 7.10 (d,  $J = 2.0$  Hz, 1H), 6.99 (dd,  $J = 2.1$ , 8.8 Hz, 1H), 3.85 (s, 3H), 1.61 (s, 9H);  $^{13}\text{C}$  NMR (150 MHz,  $\text{CDCl}_3$ )  $\delta$  172.5, 157.2, 149.1, 134.2, 132.7, 129.5, 129.3, 128.7 (q,  $J_{\text{CF}} = 309.0$  Hz), 127.8, 127.5, 116.9, 115.9, 112.5, 85.0, 60.0, 55.9, 28.1;  $^{19}\text{F}$  NMR (376 MHz,  $\text{CDCl}_3$ )  $\delta$  -38.72 (s, 3F); HRMS (ESI) calcd for  $\text{C}_{21}\text{H}_{20}\text{F}_3\text{NO}_4\text{SNa}$   $[\text{M}+\text{Na}]^+$  462.0963, found 462.0959.

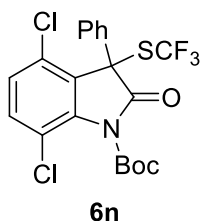

**tert-butyl 4,7-dichloro-2-oxo-3-phenyl-3-(trifluoromethylthio)indoline-1-carboxylate (6n).**  $^1\text{H}$  NMR (600 MHz,  $\text{CDCl}_3$ )  $\delta$  7.43 (d,  $J = 6.0$  Hz, 1H), 7.40-7.33 (m, 5H), 7.22 (d,  $J = 12.0$  Hz, 1H), 1.59 (s, 9H);  $^{13}\text{C}$  NMR (150 MHz,  $\text{CDCl}_3$ )  $\delta$  172.1, 147.1, 138.5, 133.1, 131.9, 131.0, 129.8, 129.4, 128.8 (q,  $J_{CF} = 309.0$  Hz), 127.2, 127.0, 126.2, 117.8, 86.7, 60.3, 27.6;  $^{19}\text{F}$  NMR (376 MHz,  $\text{CDCl}_3$ )  $\delta$  -39.19 (s, 3F); HRMS (ESI) calcd for  $\text{C}_{20}\text{H}_{16}\text{Cl}_2\text{F}_3\text{NO}_3\text{SNa}$   $[\text{M}+\text{Na}]^+$  500.0078, found 500.0072.

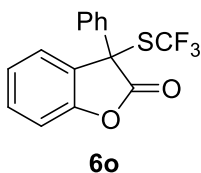

**3-phenyl-3-(trifluoromethylthio)benzofuran-2(3H)-one (6o).**  $^1\text{H}$  NMR (600 MHz,  $\text{CDCl}_3$ )  $\delta$  7.63-7.57 (m, 3H), 7.50-7.44 (m, 1H), 7.43-7.37 (m, 3H), 7.34 (t,  $J = 6.0$  Hz, 1H), 7.21 (d,  $J = 12.0$  Hz, 1H);  $^{13}\text{C}$  NMR (150 MHz,  $\text{CDCl}_3$ )  $\delta$  173.9, 152.6, 132.9, 131.3, 129.9, 129.5, 128.4 (q,  $J_{CF} = 309.0$  Hz), 127.6, 127.2, 125.8, 125.1, 111.8, 57.5;  $^{19}\text{F}$  NMR (376 MHz,  $\text{CDCl}_3$ )  $\delta$  -39.20 (s, 3F); HRMS (ESI) calcd for  $\text{C}_{15}\text{H}_9\text{F}_3\text{O}_2\text{SNa}$   $[\text{M}+\text{Na}]^+$  333.0173, found 333.0171.

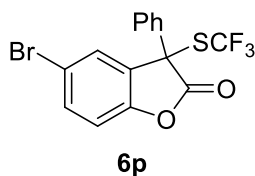

**5-bromo-3-phenyl-3-(trifluoromethylthio)benzofuran-2(3H)-one (6p).**  $^1\text{H}$  NMR (600 MHz,  $\text{CDCl}_3$ )  $\delta$  7.73 (d,  $J = 6.0$  Hz, 1H), 7.62-7.54 (m, 3H), 7.46-7.40 (m, 3H), 7.12 (d,  $J = 6.0$  Hz, 1H);  $^{13}\text{C}$  NMR (150 MHz,  $\text{CDCl}_3$ )  $\delta$  173.1, 151.4, 134.4, 132.3, 130.2, 130.0, 129.7, 128.3 (q,  $J_{CF} = 309.0$  Hz), 128.0, 127.4, 117.6, 113.5, 57.3;  $^{19}\text{F}$  NMR (376 MHz,  $\text{CDCl}_3$ )  $\delta$  -39.02 (s, 3F); HRMS (ESI) calcd for  $\text{C}_{15}\text{H}_8\text{BrF}_3\text{O}_2\text{SNa}$   $[\text{M}+\text{Na}]^+$  410.9278, found 410.9274.



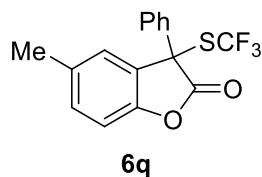

**5-methyl-3-phenyl-3-(trifluoromethylthio)benzofuran-2(3H)-one (6q).**  $^1\text{H NMR}$  (600 MHz,  $\text{CDCl}_3$ )  $\delta$  7.63-7.56 (m, 2H), 7.44-7.36 (m, 4H), 7.25 (d,  $J = 12.0$  Hz, 1H), 7.09 (d,  $J = 6.0$  Hz, 1H), 2.44 (s, 3H);  $^{13}\text{C NMR}$  (150 MHz,  $\text{CDCl}_3$ )  $\delta$  174.2, 150.5, 134.9, 133.1, 131.8, 130.0, 129.5, 128.4 (q,  $J_{CF} = 309.0$  Hz), 127.6, 127.3, 125.6, 111.4, 57.7, 21.4;  $^{19}\text{F NMR}$  (376 MHz,  $\text{CDCl}_3$ )  $\delta$  -39.16 (s, 3F); **HRMS** (ESI) calcd for  $\text{C}_{16}\text{H}_{11}\text{F}_3\text{O}_2\text{SNa}$   $[\text{M}+\text{Na}]^+$  347.0330, found 347.0326.

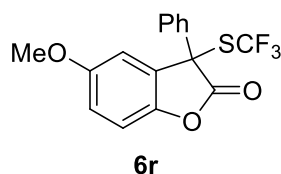

**5-methoxy-3-phenyl-3-(trifluoromethylthio)benzofuran-2(3H)-one (6r).**  $^1\text{H NMR}$  (600 MHz,  $\text{CDCl}_3$ )  $\delta$  7.62-7.56 (m, 2H), 7.48 (d,  $J = 12.0$  Hz, 1H), 7.42-7.36 (m, 3H), 6.87 (dd,  $J = 6.0, 12.0$  Hz, 1H), 6.76 (d,  $J = 6.0$  Hz, 1H), 3.87 (s, 3H);  $^{13}\text{C NMR}$  (150 MHz,  $\text{CDCl}_3$ )  $\delta$  174.3, 162.2, 153.7, 133.4, 129.8, 129.5, 128.5 (q,  $J_{CF} = 309.0$  Hz), 127.8, 127.6, 116.9, 111.4, 97.8, 57.6, 55.9;  $^{19}\text{F NMR}$  (376 MHz,  $\text{CDCl}_3$ )  $\delta$  -39.16 (s, 3F); **HRMS** (ESI) calcd for  $\text{C}_{16}\text{H}_{11}\text{F}_3\text{O}_3\text{SNa}$   $[\text{M}+\text{Na}]^+$  363.0279, found 363.0275.

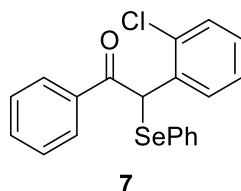

**2-(2-chlorophenyl)-1-phenyl-2-(phenylselanyl)ethanone (7).**  $^1\text{H NMR}$  (600 MHz,  $\text{CDCl}_3$ )  $\delta$  7.96-7.90 (m, 2H), 7.63 (dd,  $J = 6.0, 12.0$  Hz, 1H), 7.54-7.48 (m, 1H), 7.43-7.35 (m, 4H), 7.33-7.26 (m, 2H), 7.25-7.12 (m, 4H) 6.47 (s, 1H);  $^{13}\text{C NMR}$  (150 MHz,  $\text{CDCl}_3$ )  $\delta$  195.0, 136.4, 135.7, 135.4, 133.5, 133.3, 131.5, 129.5, 129.0, 129.0, 129.0, 128.9, 128.8, 128.2, 127.5, 43.2; **HRMS** (ESI) calcd for  $\text{C}_{20}\text{H}_{16}\text{ClOSe}$   $[\text{M}+\text{H}]^+$  387.0055, found 387.0049.

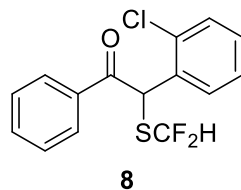

**2-(2-chlorophenyl)-2-(difluoromethylthio)-1-phenylethanone (8).**  $^1\text{H NMR}$  (400 MHz,  $\text{CDCl}_3$ )  $\delta$  8.99 (d,  $J = 8.0$  Hz, 2H), 7.56 (t,  $J = 4.0$  Hz, 1H), 7.50-7.40 (m, 4H), 7.29-7.20 (m, 2H), 6.84 (t,  $J = 56.0$  Hz, 1H), 6.57 (s, 1H);  $^{13}\text{C NMR}$  (150 MHz,  $\text{CDCl}_3$ )  $\delta$  193.6, 134.6, 134.1, 133.8, 133.2, 130.5, 130.3, 130.1, 129.9 (t,  $J_{CF} = 273.0$  Hz), 129.0, 128.1, 49.5;  $^{19}\text{F NMR}$  (376 MHz,  $\text{CDCl}_3$ )  $\delta$  -91.76 (dd,  $J = 60.2, 248.2$  Hz, 1F), -94.82 (dd,  $J = 60.2, 248.2$  Hz, 1F); **HRMS** (ESI) calcd for  $\text{C}_{15}\text{H}_{11}\text{F}_2\text{OSNa}$  ( $\text{M}+\text{Na}$ ) $^+$  335.0085, found 335.0081.

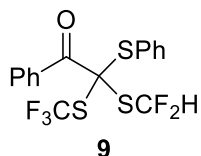

**2-(difluoromethylthio)-1-phenyl-2-(phenylthio)-2-(trifluoromethylthio)ethanone (9).**  $^1\text{H NMR}$  (400 MHz,  $\text{CDCl}_3$ )  $\delta$  8.33 (d,  $J = 6.0$  Hz, 2H), 7.62 (t,  $J = 12.0$  Hz, 1H), 7.48 (t,  $J = 12.0$  Hz, 2H), 7.42 (t,  $J = 12.0$  Hz, 1H), 7.37-7.33 (m, 2H), 7.29 (t,  $J = 12.0$  Hz, 2H), 7.27 (t,  $J = 56.0$  Hz, 1H);  $^{13}\text{C NMR}$  (150 MHz,  $\text{CDCl}_3$ )  $\delta$  189.3, 137.1, 134.0, 132.9, 131.5, 131.1, 129.5, 128.4, 128.2 (q,  $J_{CF} = 306.0$  Hz), 122.1 (t,  $J_{CF} = 270.0$  Hz);  $^{19}\text{F NMR}$  (376 MHz,  $\text{CDCl}_3$ )  $\delta$  -36.82 (s, 3F), -93.96 (dd,  $J = 37.6, 173.0$  Hz, 1F), -94.82 (dd,  $J = 37.6, 173.0$  Hz, 1F); **HRMS** (ESI) calcd for  $\text{C}_{16}\text{H}_{11}\text{F}_5\text{OS}_3\text{Na}$  ( $\text{M}+\text{Na}$ ) $^+$  432.9790, found 432.9786.

### Scale-up Experiment

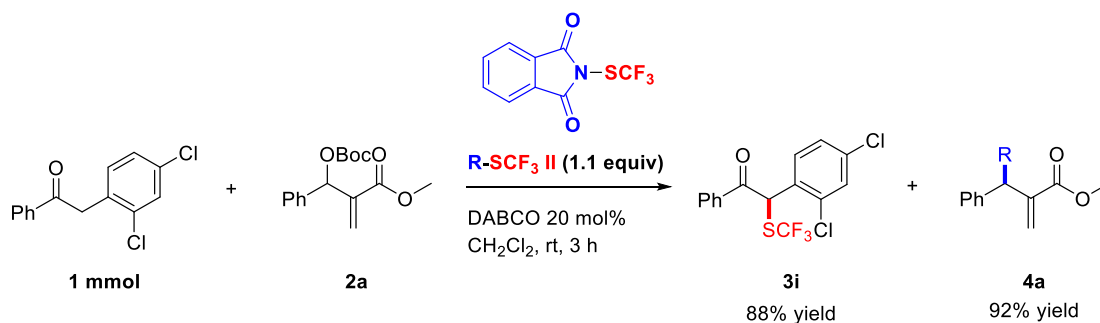

An oven-dried vial fitted with a stirrer bar was charged with acyclic ketones **1i** (1.0 mmol), MBH carbonates **2a** (1.1 mmol), *N*-SCF<sub>3</sub> phthalimide **II** (1.1 mmol) and DABCO (0.2 equiv) in dry  $\text{CH}_2\text{Cl}_2$  (10.0 mL) and the mixture was stirred at room temperature for 3 h. Concentration and purification by silica gel column chromatography gave the product **3i** in 88% yield and **4a** in 92% yield.

### General Procedure for a Double Asymmetric Cascade Reaction Catalyzed by Quinidine.

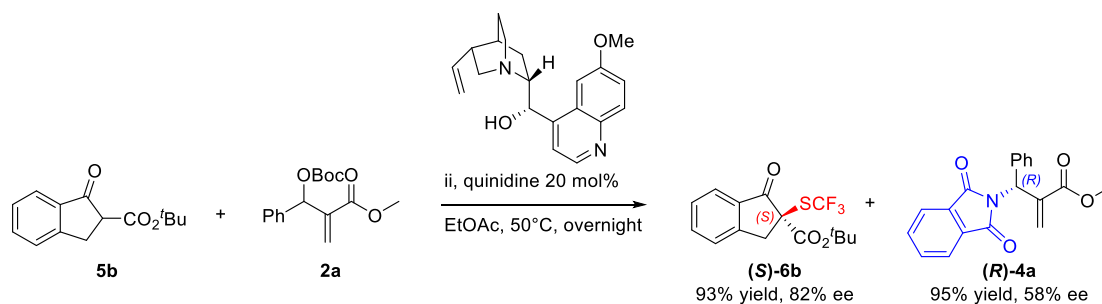

An oven-dried vial fitted with a stirrer bar was charged with acyclic ketones (0.1 mmol), MBH carbonates (0.11 mmol), *N*-SCF<sub>3</sub> phthalimide (0.11 mmol) and quinidine (0.2 equiv) in dry EtOAc (1.0 mL) and the mixture was stirred at 50 °C for 12 h. Concentration and purification by silica gel column chromatography gave the product **(S)-6b** and **(R)-4a**.

**HPLC: (S)-6b** AD-H, 2-PrOH: *n*-hexane = 1:99, 25 °C, flow rate: 0.5 mL/min,  $\lambda$  = 254 nm,  $t_R$  = 8.69 min (minor) and  $t_R$  = 9.03 min (major).

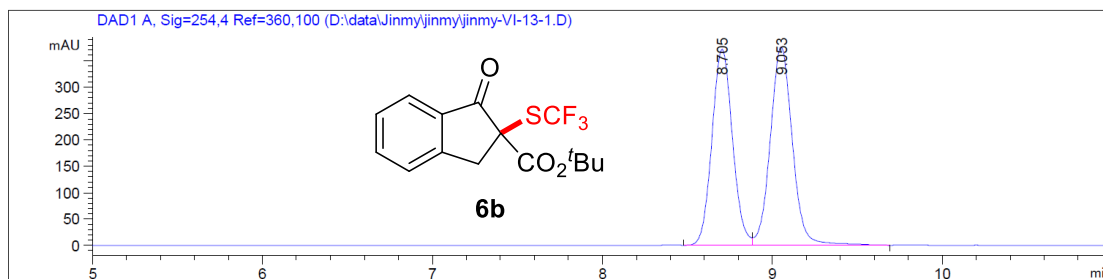

Signal 1: DAD1 A, Sig=254,4 Ref=360,100

| Peak # | RetTime [min] | Type | Width [min] | Area [mAU*s] | Height [mAU] | Area %  |
|--------|---------------|------|-------------|--------------|--------------|---------|
| 1      | 8.705         | BV   | 0.1298      | 3118.67529   | 371.95346    | 47.9030 |
| 2      | 9.053         | VB   | 0.1392      | 3391.72266   | 376.17200    | 52.0970 |

Totals : 6510.39795 748.12546

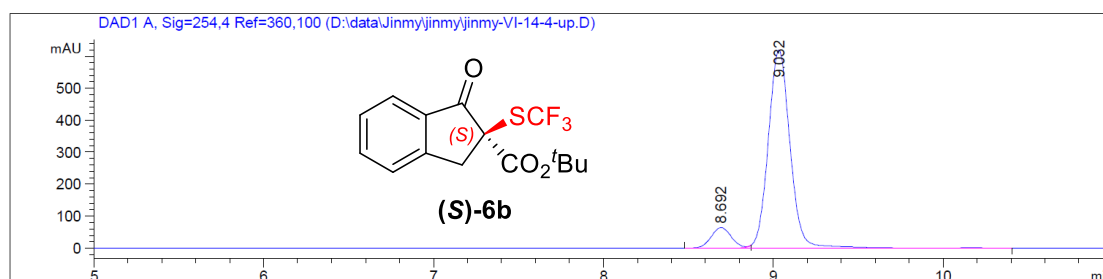

Signal 1: DAD1 A, Sig=254,4 Ref=360,100

| Peak # | RetTime [min] | Type | Width [min] | Area [mAU*s] | Height [mAU] | Area %  |
|--------|---------------|------|-------------|--------------|--------------|---------|
| 1      | 8.692         | BV E | 0.1274      | 526.33350    | 64.34969     | 8.6974  |
| 2      | 9.032         | VV R | 0.1377      | 5525.26123   | 620.07062    | 91.3026 |

Totals : 6051.59473 684.42030

**HPLC: (R)-4a** OD-H, 2-PrOH: *n*-hexane = 30:70, 25 °C, flow rate: 1.0 mL/min,  $\lambda$  = 210 nm,  $t_R$  = 6.27 min (major) and  $t_R$  = 14.16 min (minor).

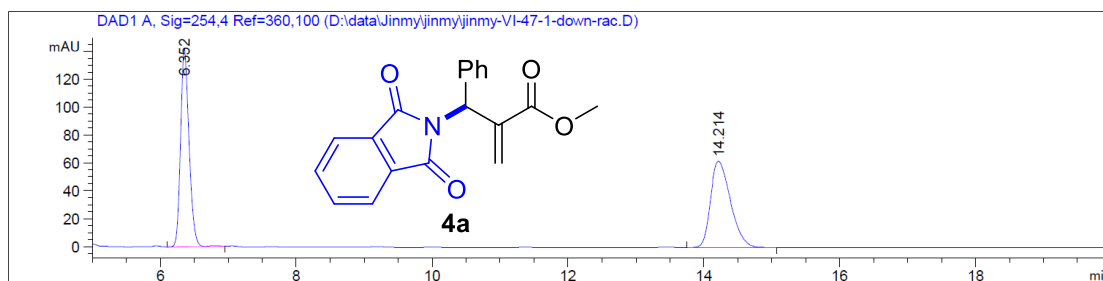

Signal 1: DAD1 A, Sig=254,4 Ref=360,100

| Peak # | RetTime [min] | Type | Width [min] | Area [mAU*s] | Height [mAU] | Area %  |
|--------|---------------|------|-------------|--------------|--------------|---------|
| 1      | 6.352         | BV R | 0.1370      | 1258.40991   | 142.48625    | 49.9691 |
| 2      | 14.214        | BB   | 0.3159      | 1259.96753   | 61.79457     | 50.0309 |

Totals : 2518.37744 204.28082

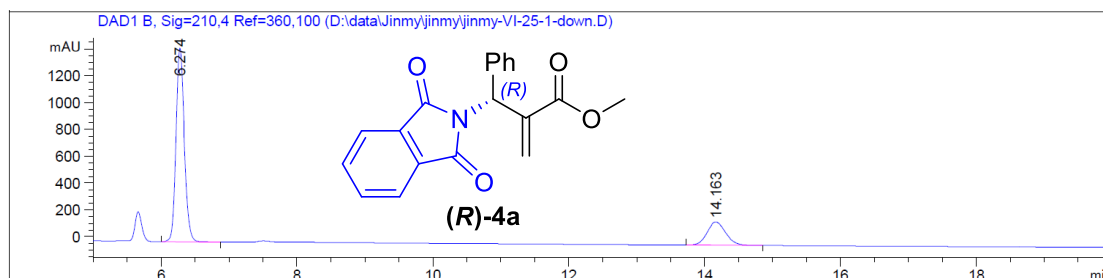

Signal 2: DAD1 B, Sig=210,4 Ref=360,100

| Peak # | RetTime [min] | Type | Width [min] | Area [mAU*s] | Height [mAU] | Area %  |
|--------|---------------|------|-------------|--------------|--------------|---------|
| 1      | 6.274         | BB   | 0.1314      | 1.23205e4    | 1445.95996   | 79.1008 |
| 2      | 14.163        | BB   | 0.2936      | 3255.20313   | 172.92360    | 20.8992 |

Totals : 1.55757e4 1618.88356

## Reference

- [1] H.-X. Zheng, X.-H. Shan, J.-P. Qu, Y.-B. Kang, *Org. Lett.* **2018**, *20*, 3310.
- [2] R. Schulz, A. Atef, D. Becker, F. Gottschalk, C. Tauber, S. Wagner, C. Arkona, A. A. Abdel-Hafez, H. H. Farag, J. Rademann, G. Wolben, *J. Med. Chem.* **2018**, *61*, 1218.
- [3] T. Minua, S. Fujioka, N. Takemura, H. Iwasaki, M. Ozeki, N. Kojima, M. Yamashita, *Synthesis* **2014**, *46*, 496.
- [4] G-Q. Xu, H. Liang, J. Fang, Z.-L. Jia, J.-Q. Chen, P.-F. Xu, *Chem. Asian J.* **2016**, *11*, 3355.
- [5] K. D. Hesp, R. J. Lundgren, M. Stradiotto, *J. Am. Chem. Soc.* **2011**, *133*, 5194.
- [6] a) X. Shao, X. Wang, T. Yang, L. Lu, Q. Shen, *Angew. Chem.* **2013**, *125*, 3541; *Angew. Chem. Int. Ed.* **2013**, *52*, 3457; b) Q.-H. Deng, C. Rettenmeier, H. Wadepohl, L. H. Gade, *Chem. Eur. J.* **2014**, *20*, 93; c) X. L. Zhu, J. H. Xu, D. J. Cheng, L. J. Zhao, X. Y. Liu, B. Tan, *Org. Lett.* **2014**, *16*, 2192; d) H. Zhang, X. Leng, X. Wan, Q. Shen, *Org. Chem. Front.* **2017**, *4*, 1051.
- [7] X.-H. Yang, J.-P. Li, D. C. Wang, M.S. Xie, G.-R. Qu, H.-M. Guo, *Chem. Commun.* **2019**, 55, 9144.

# $^1\text{H}$ NMR, $^{13}\text{C}$ NMR and $^{19}\text{F}$ NMR

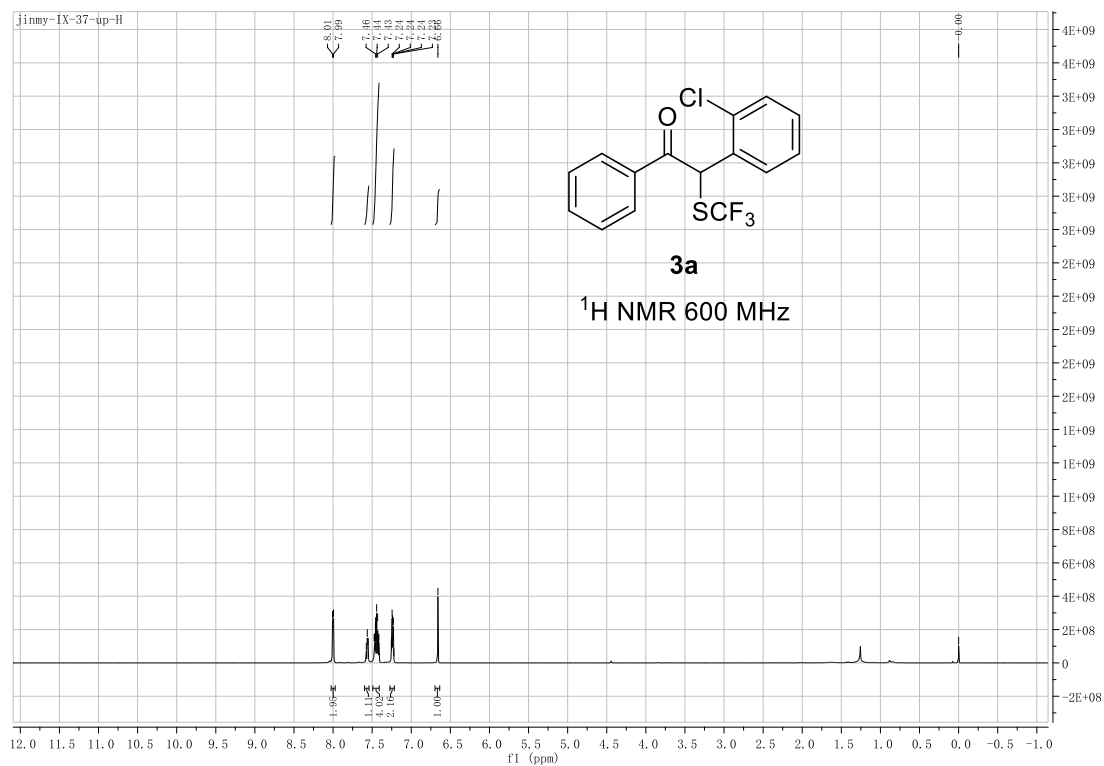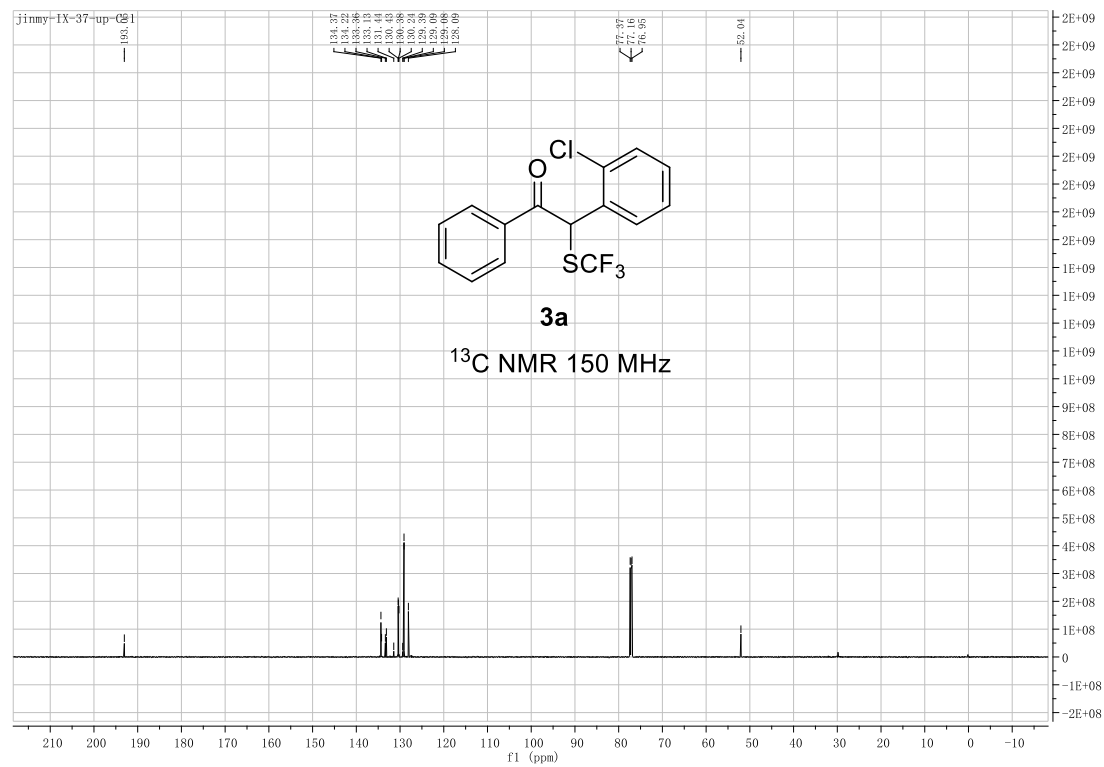

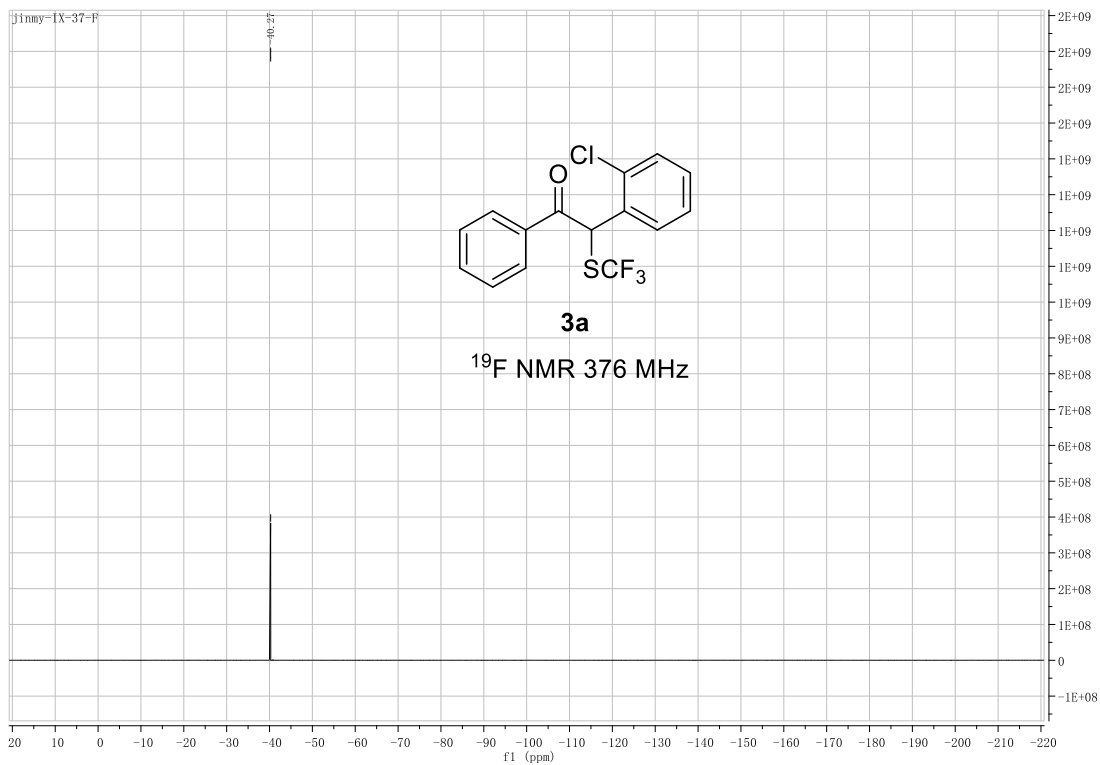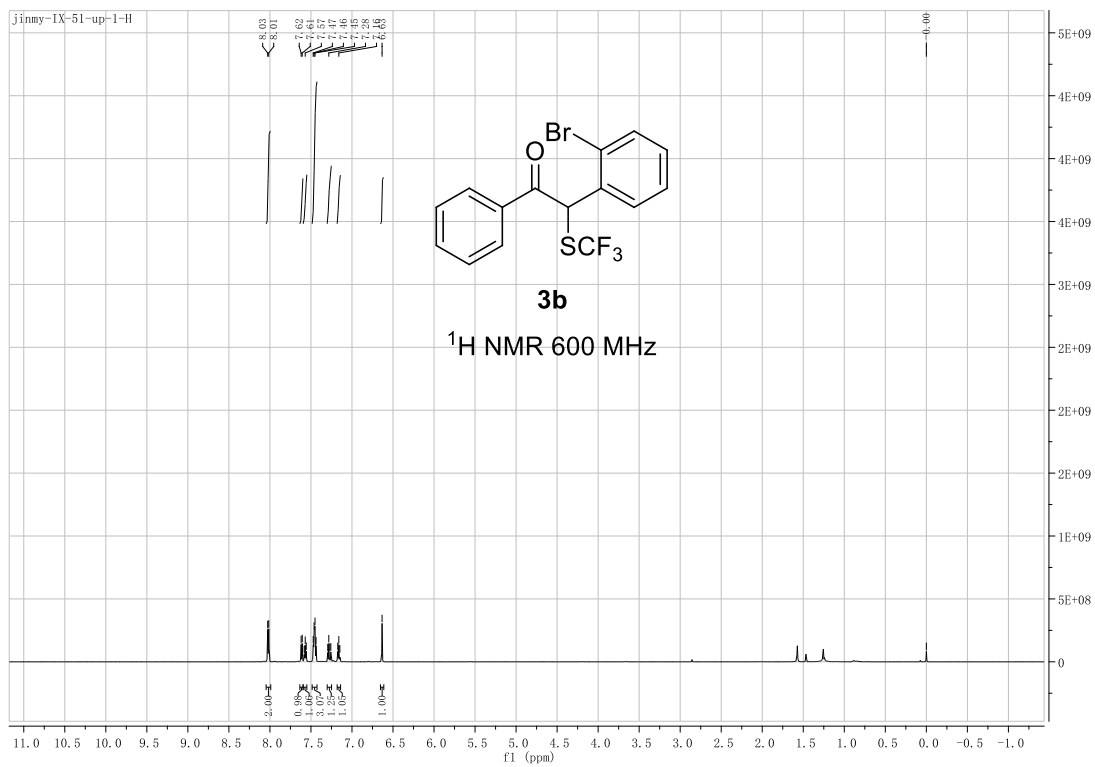



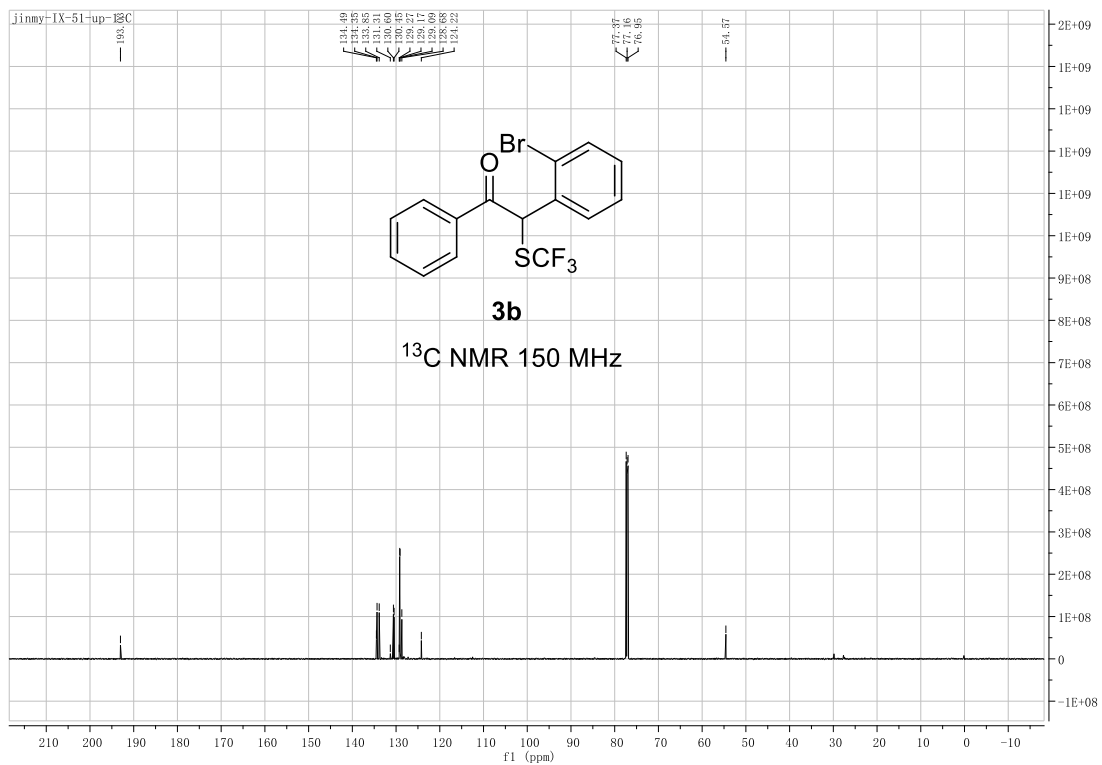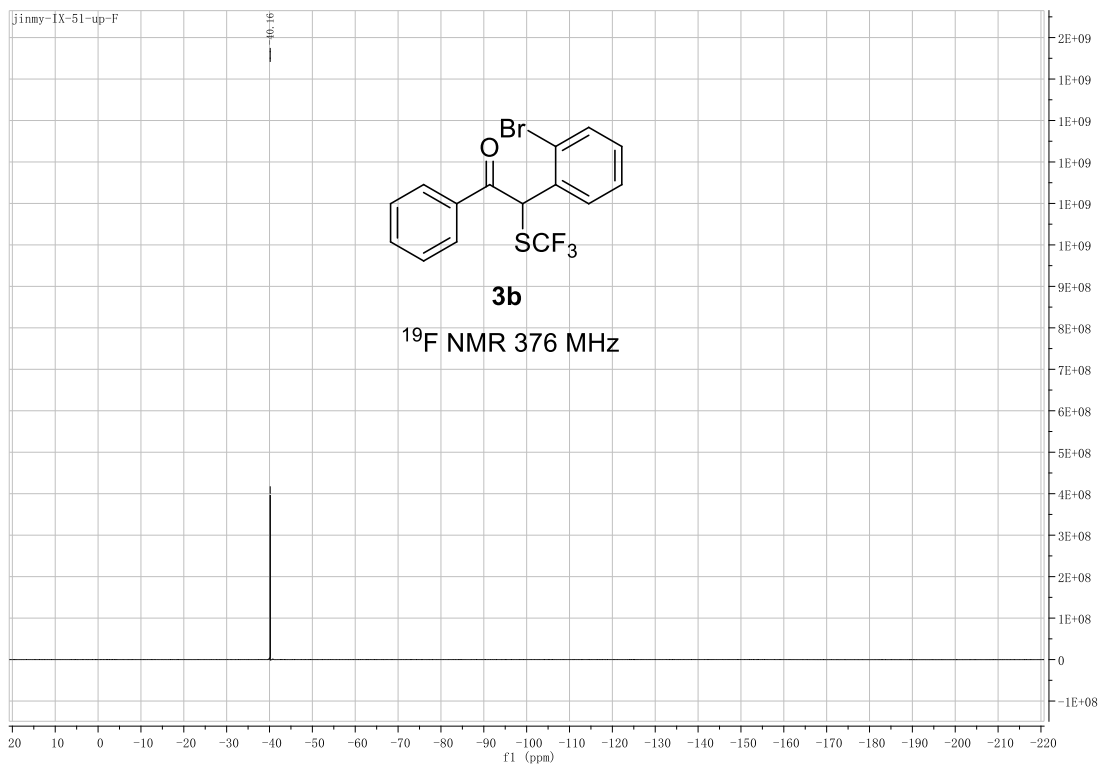

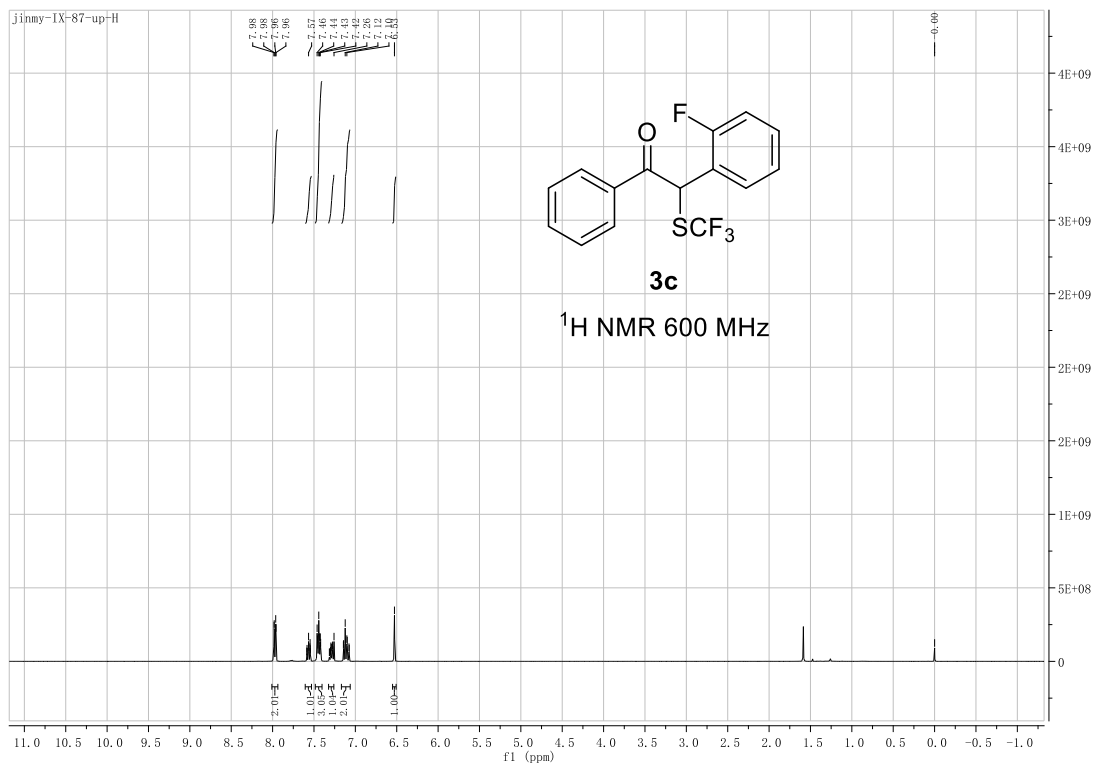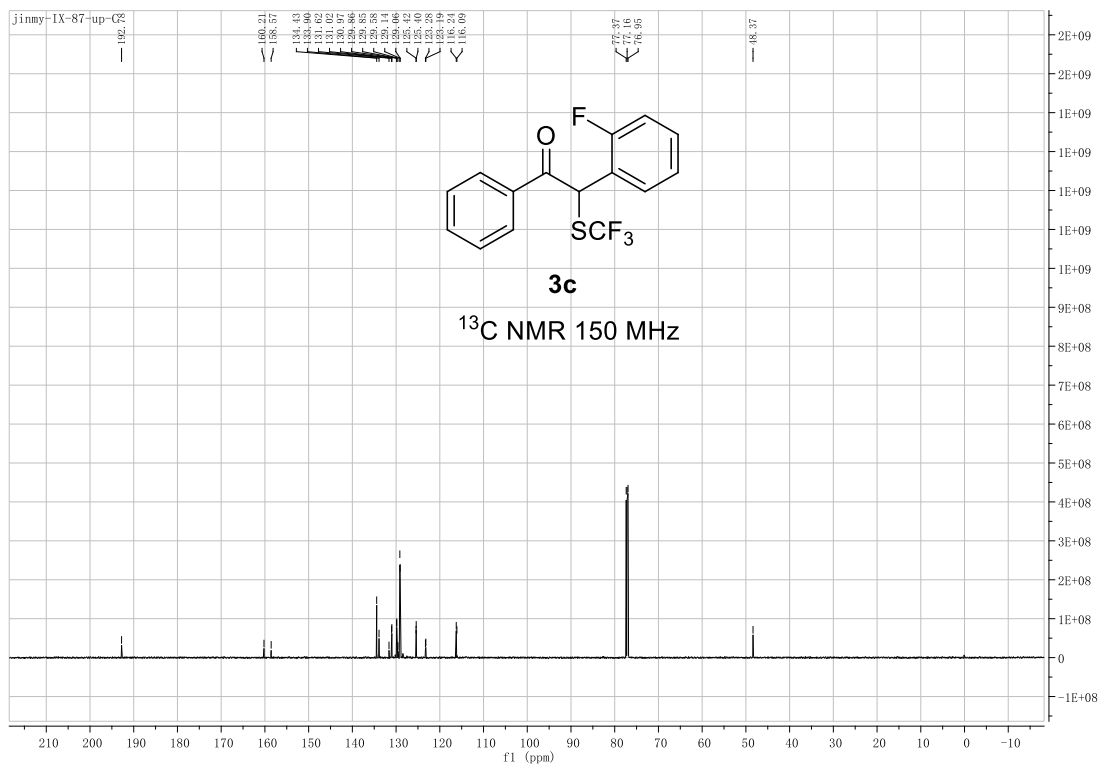

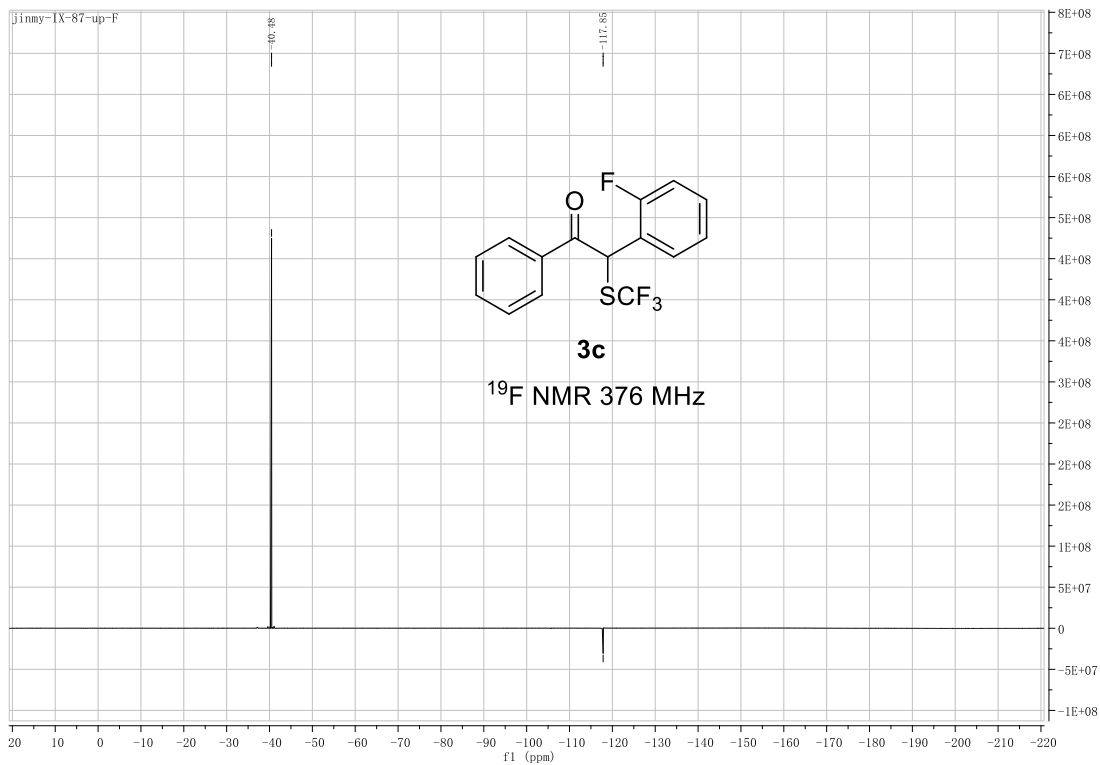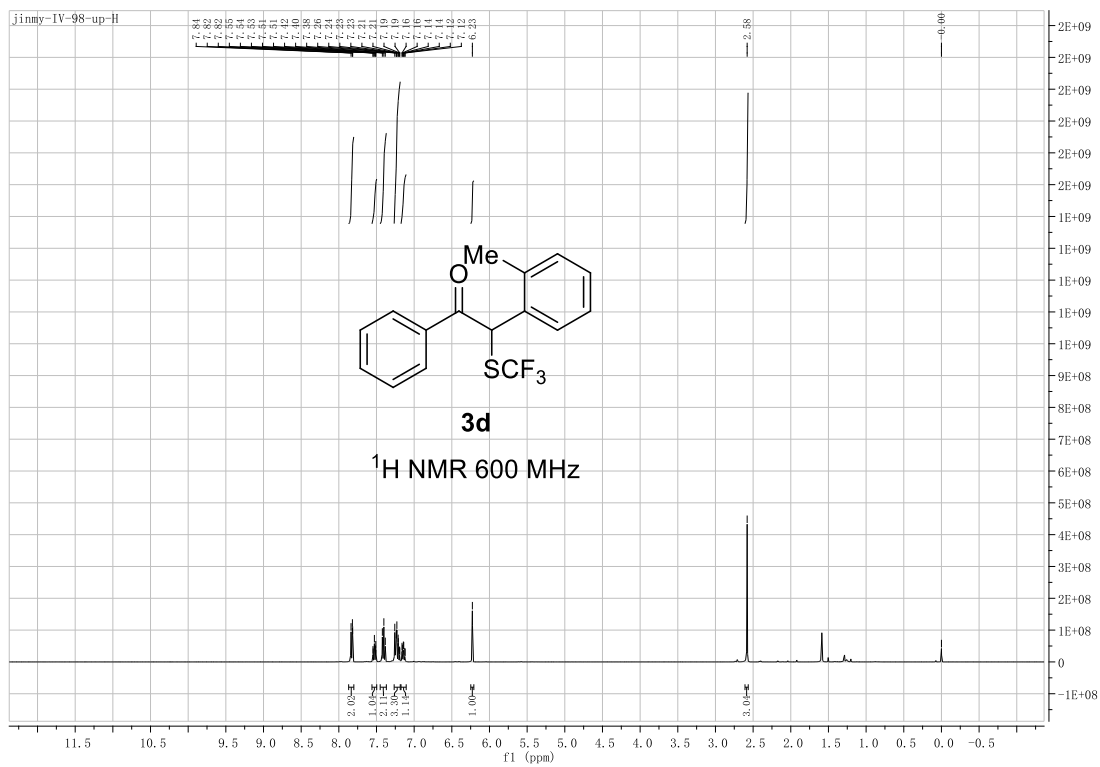

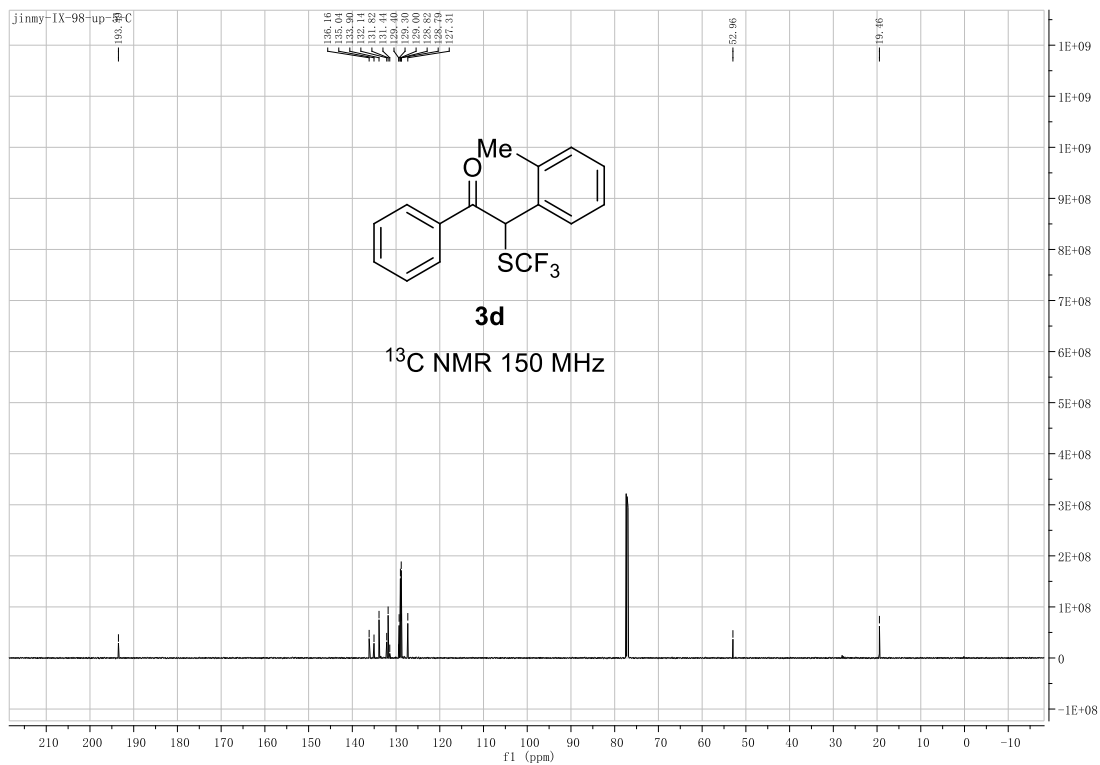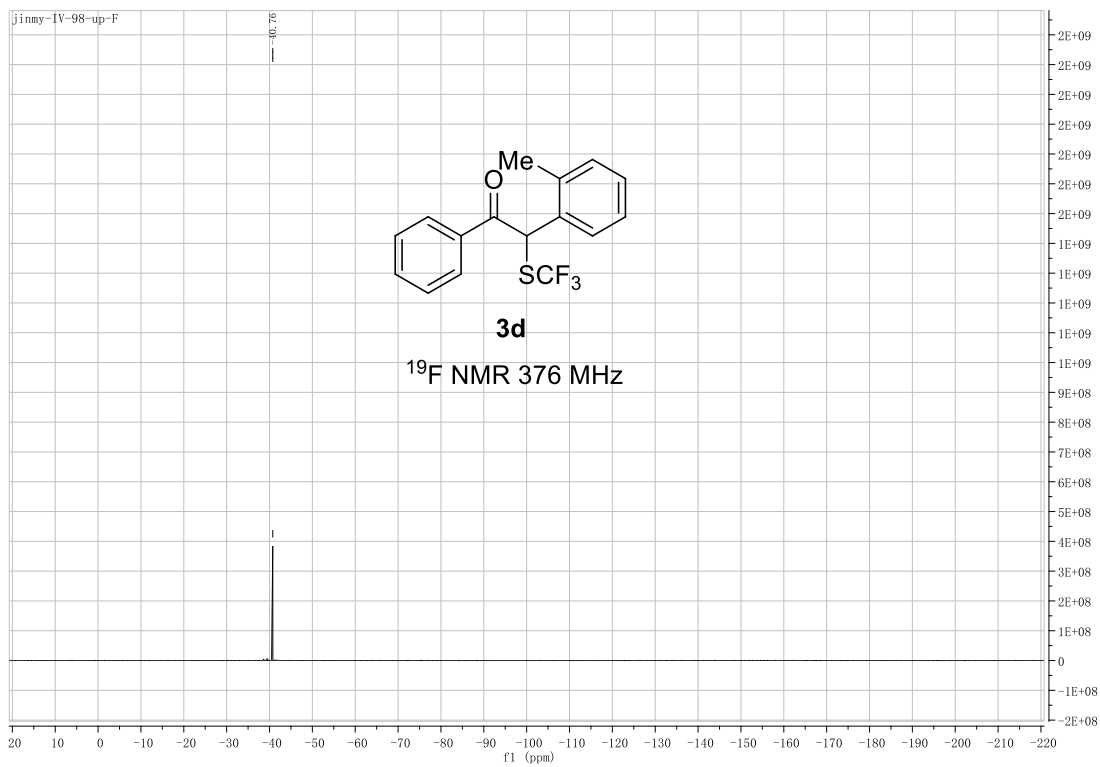



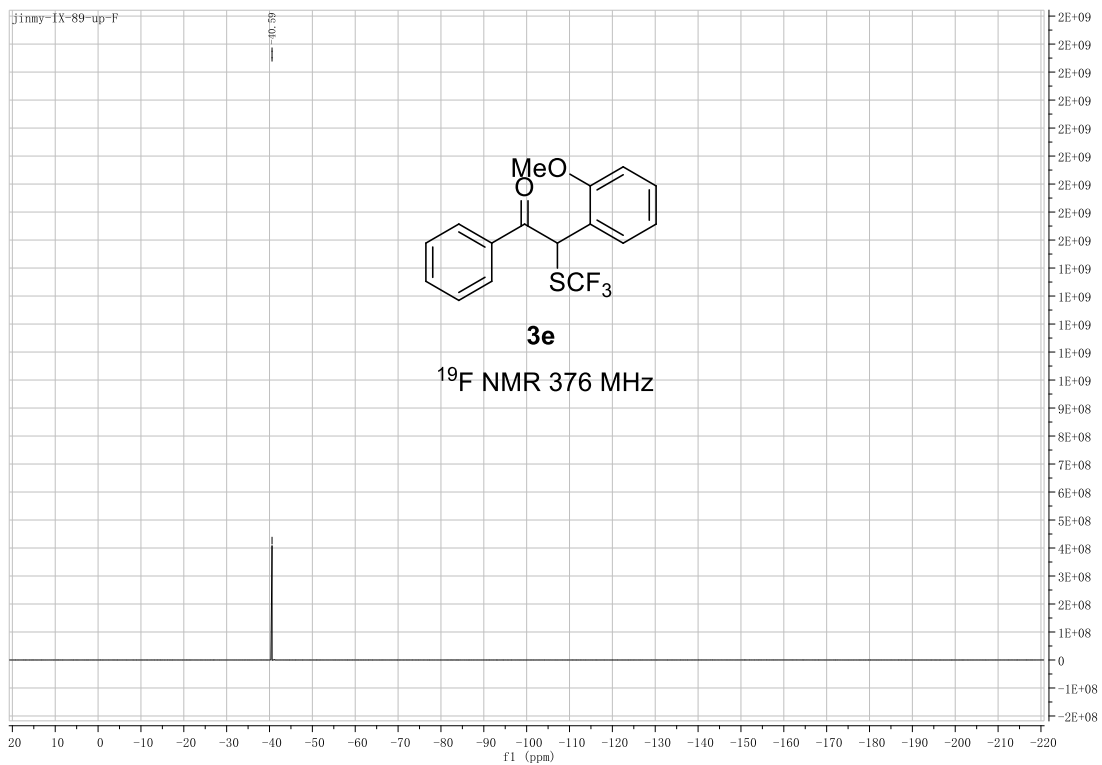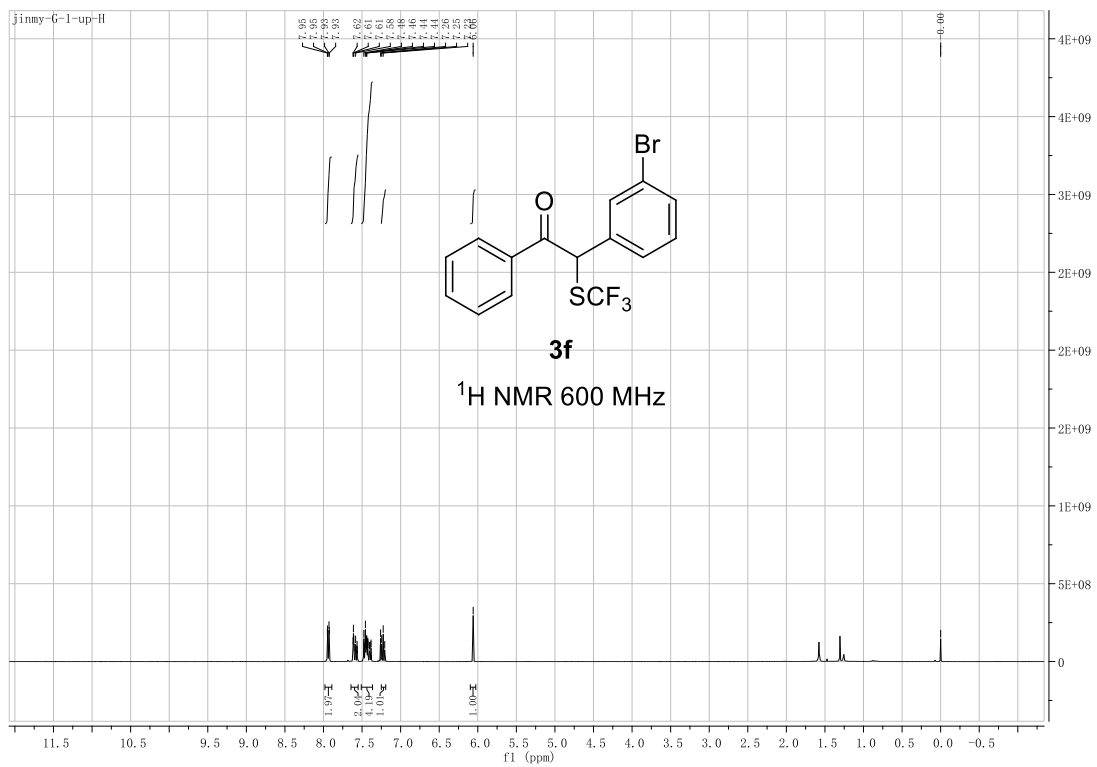

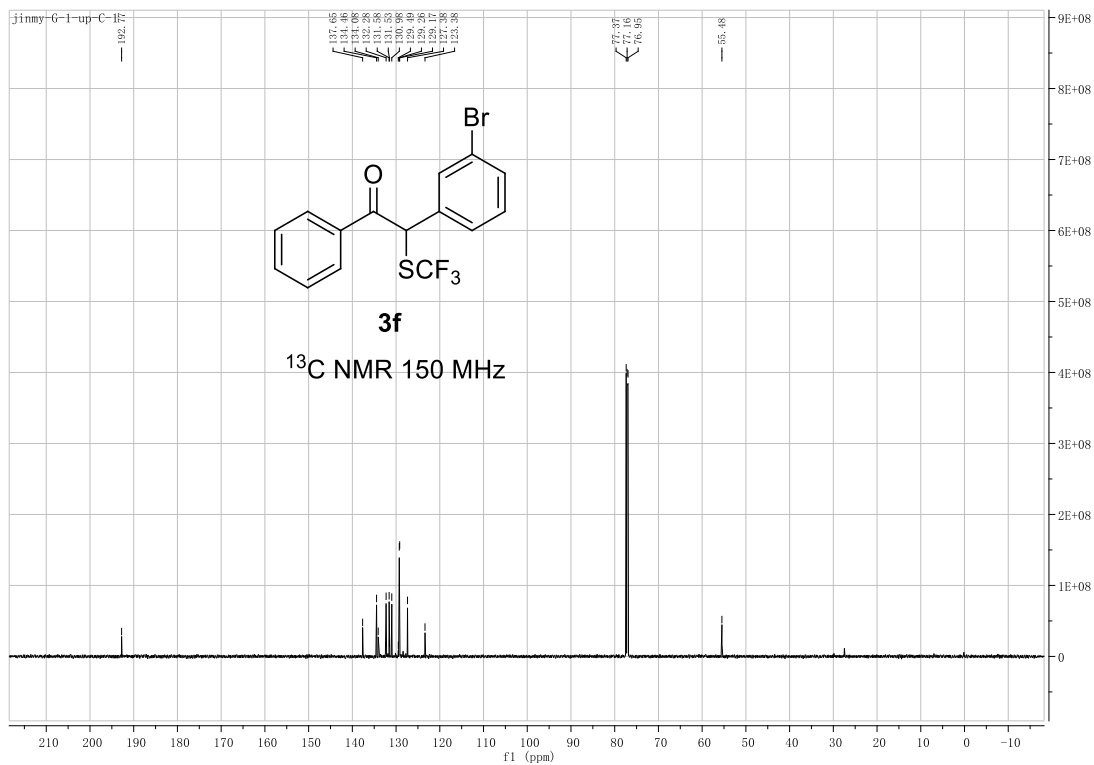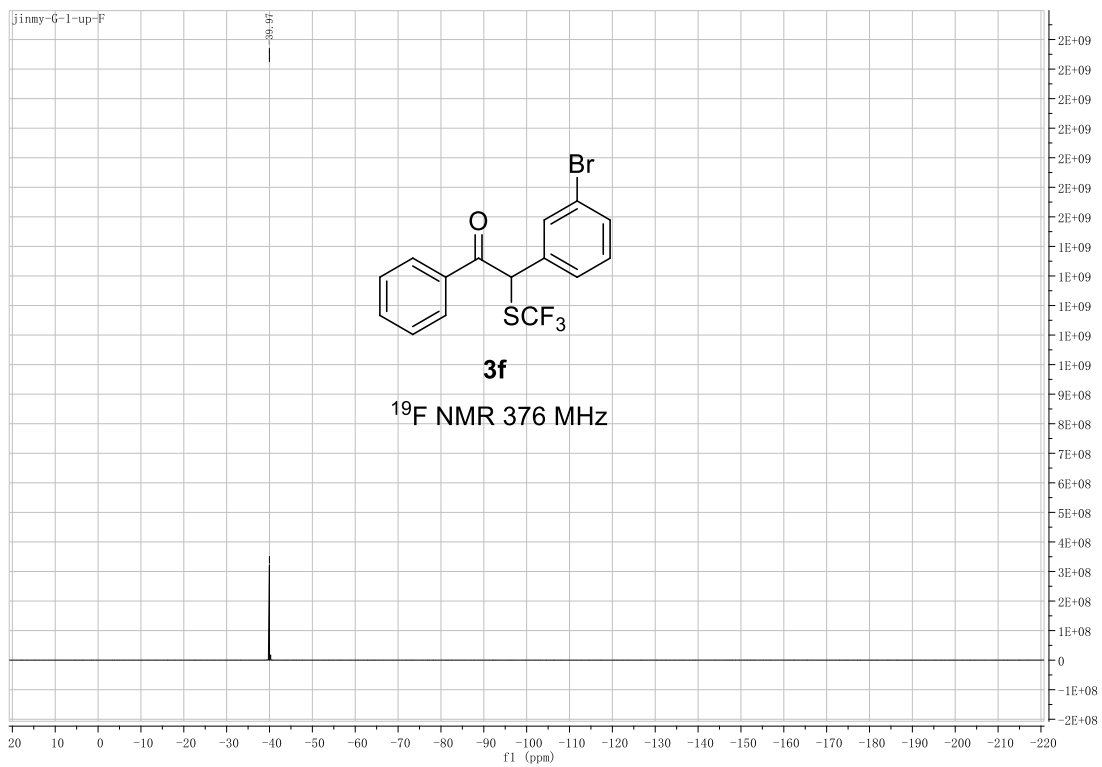

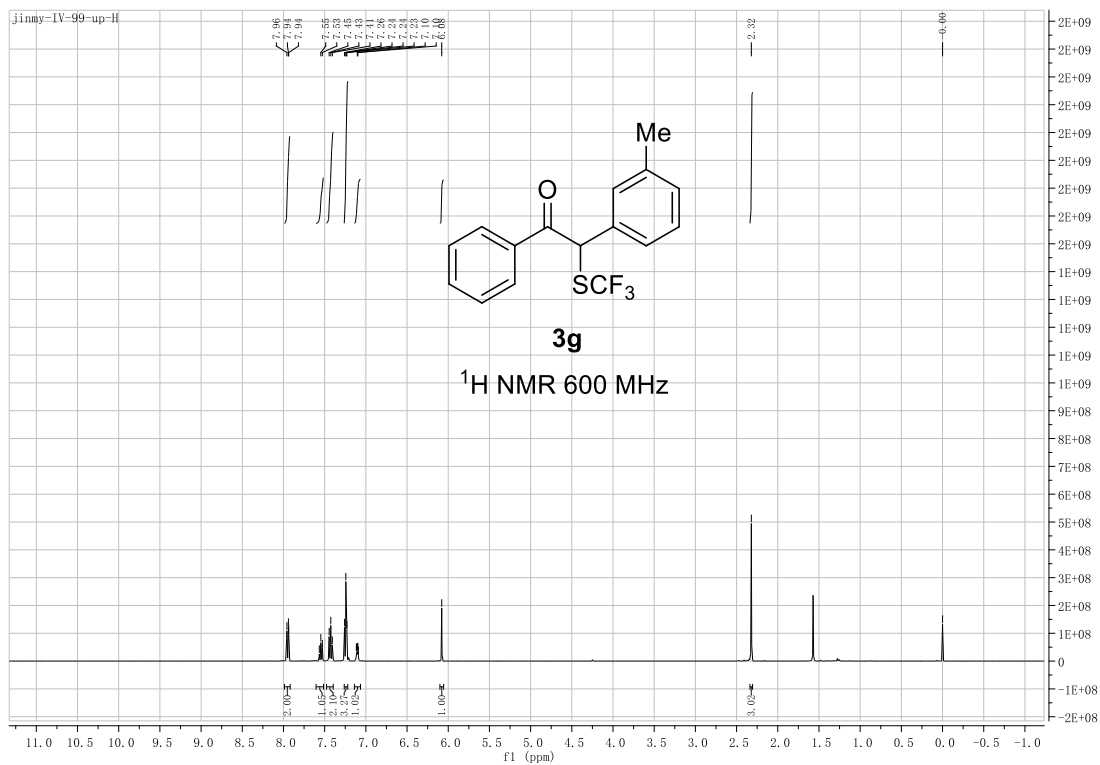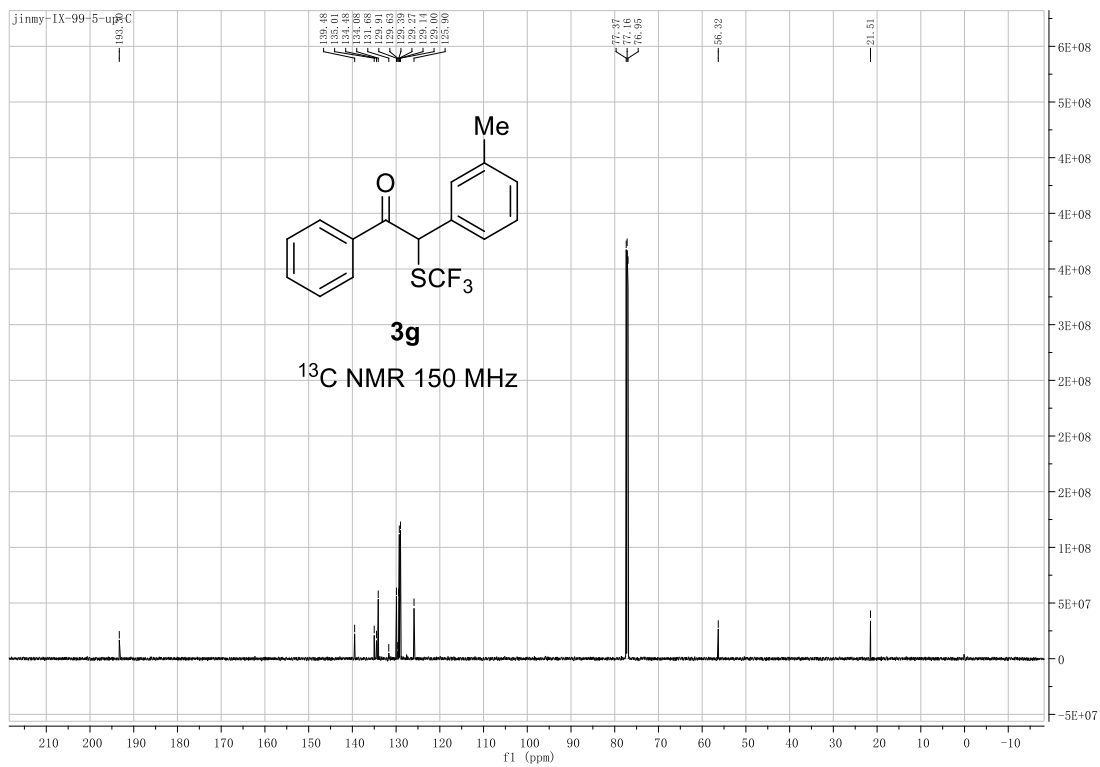



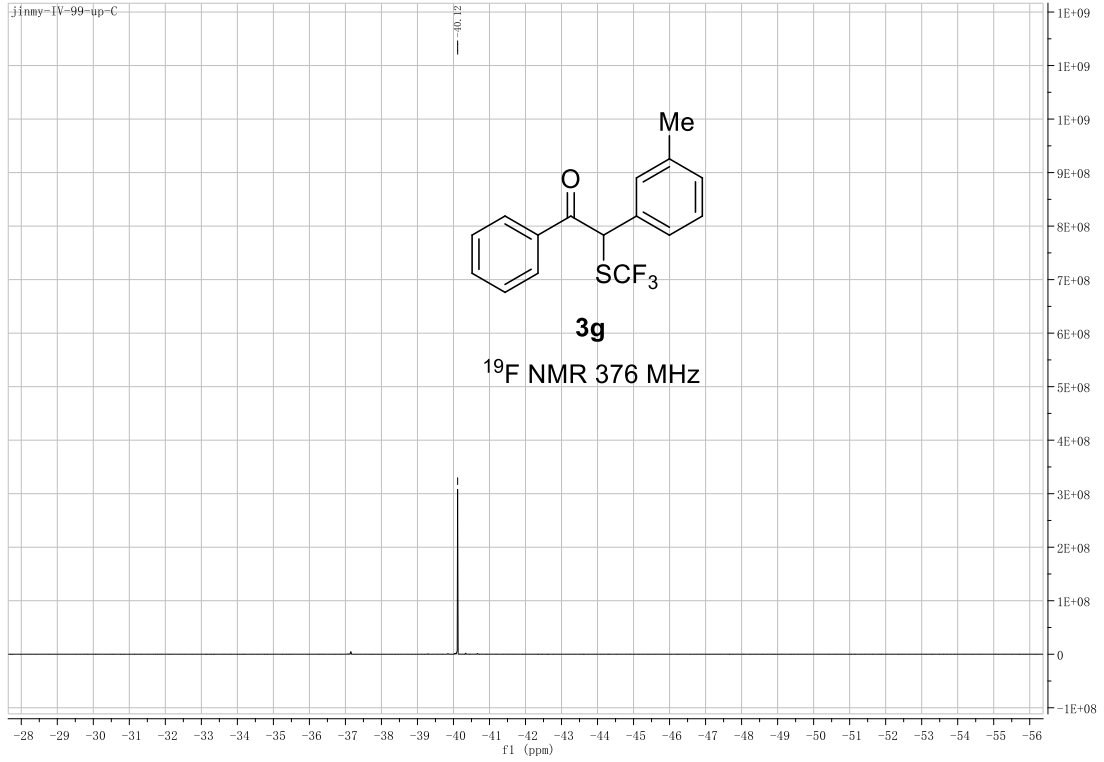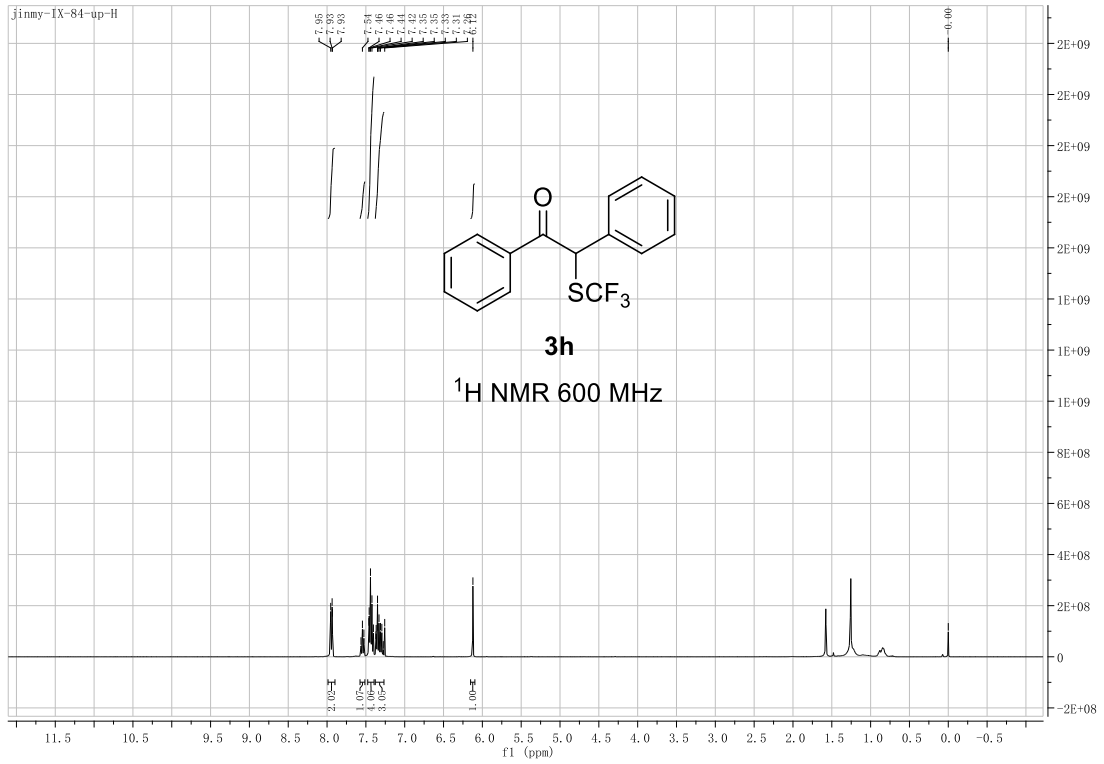

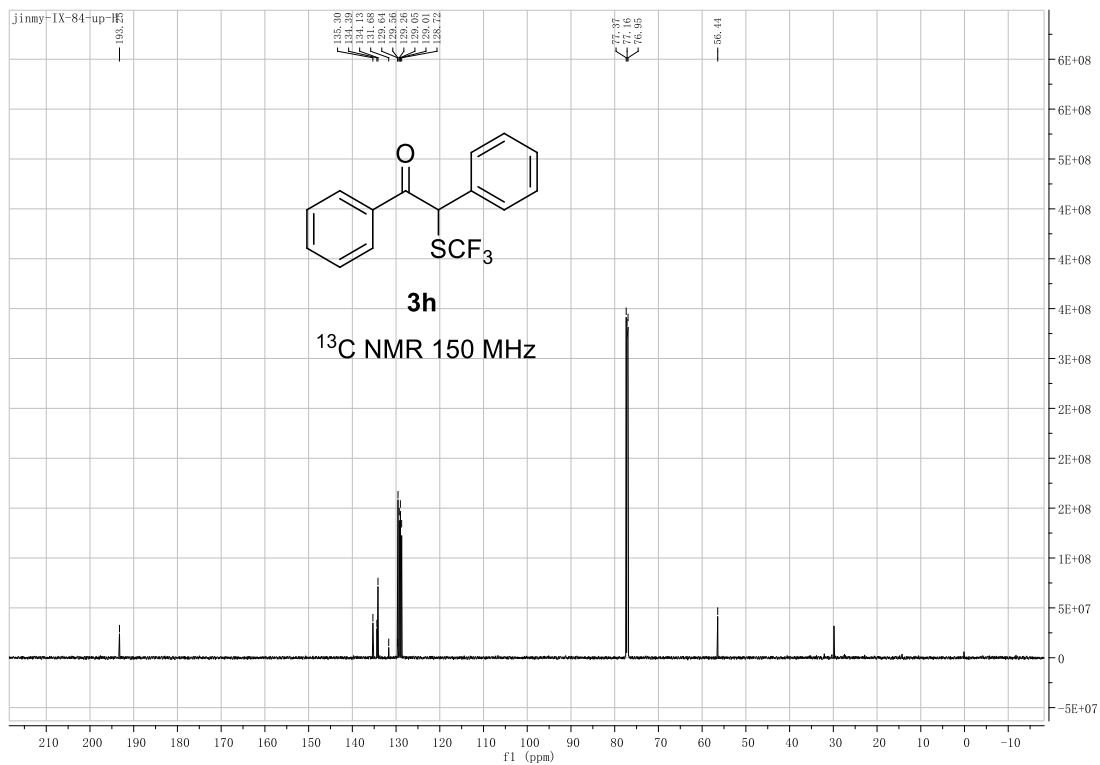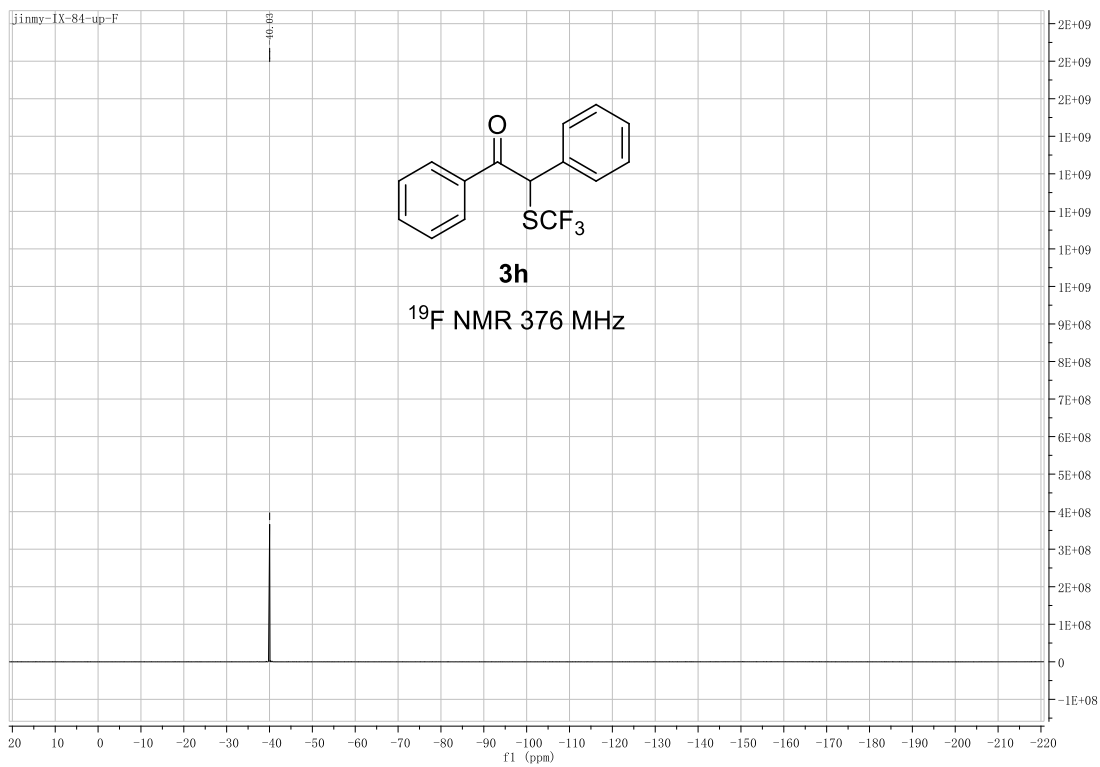

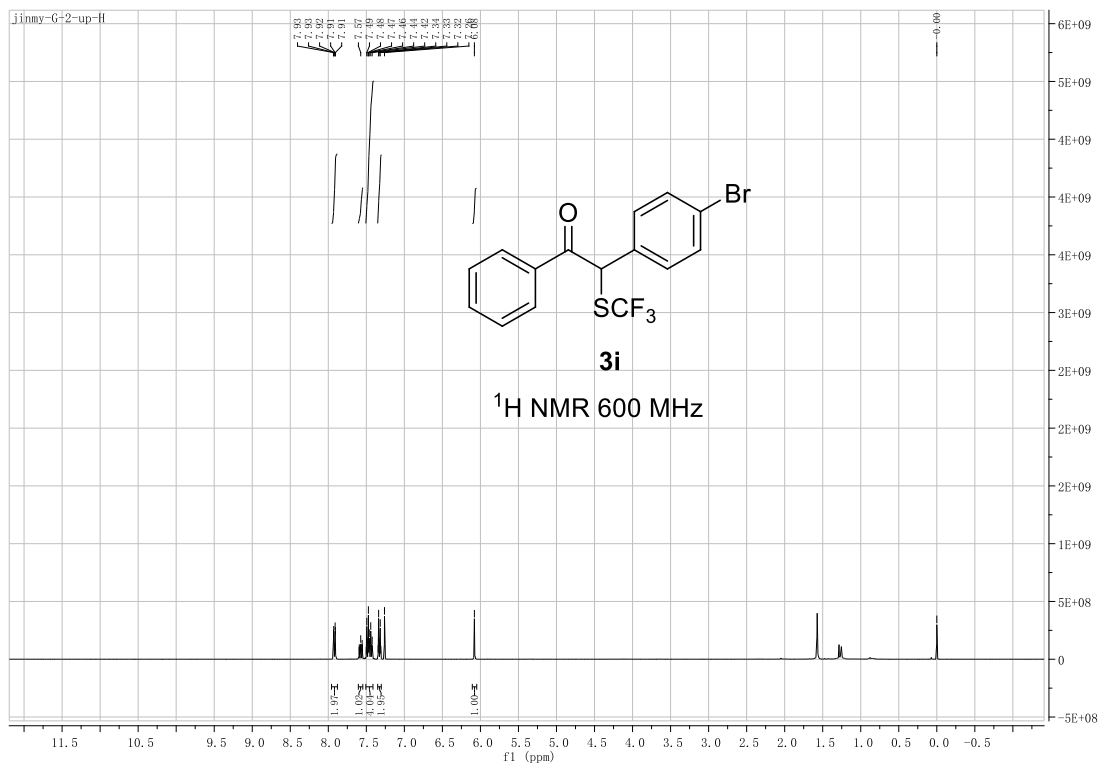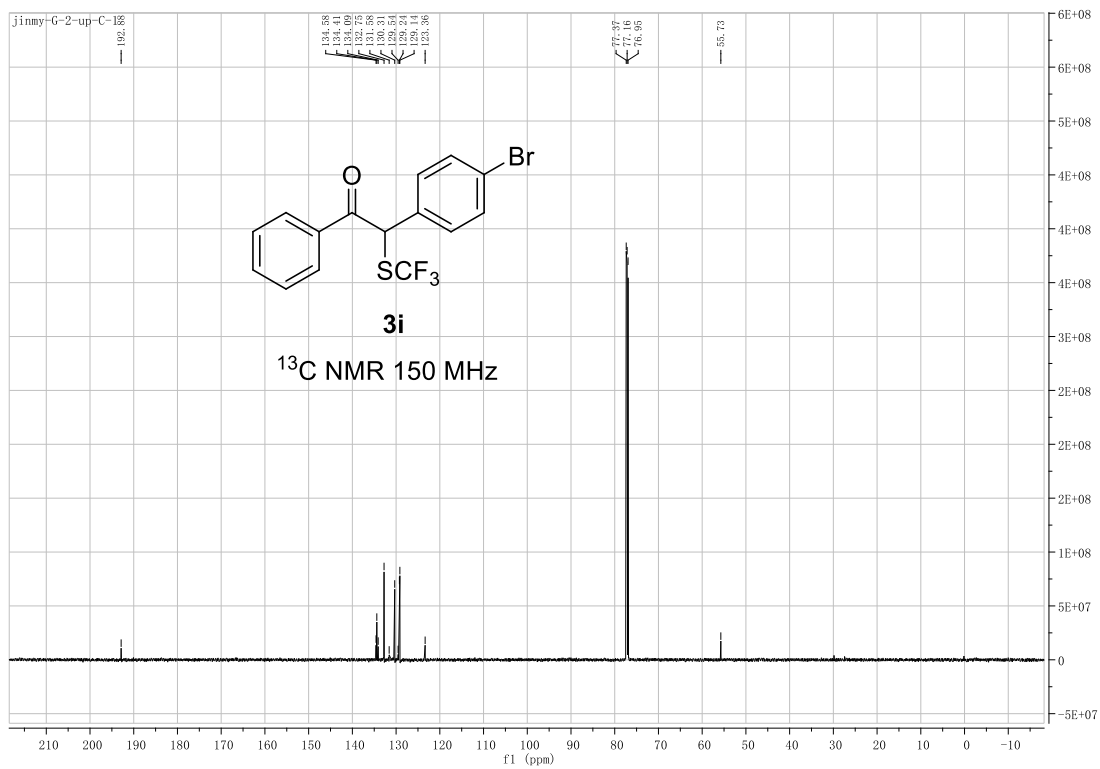

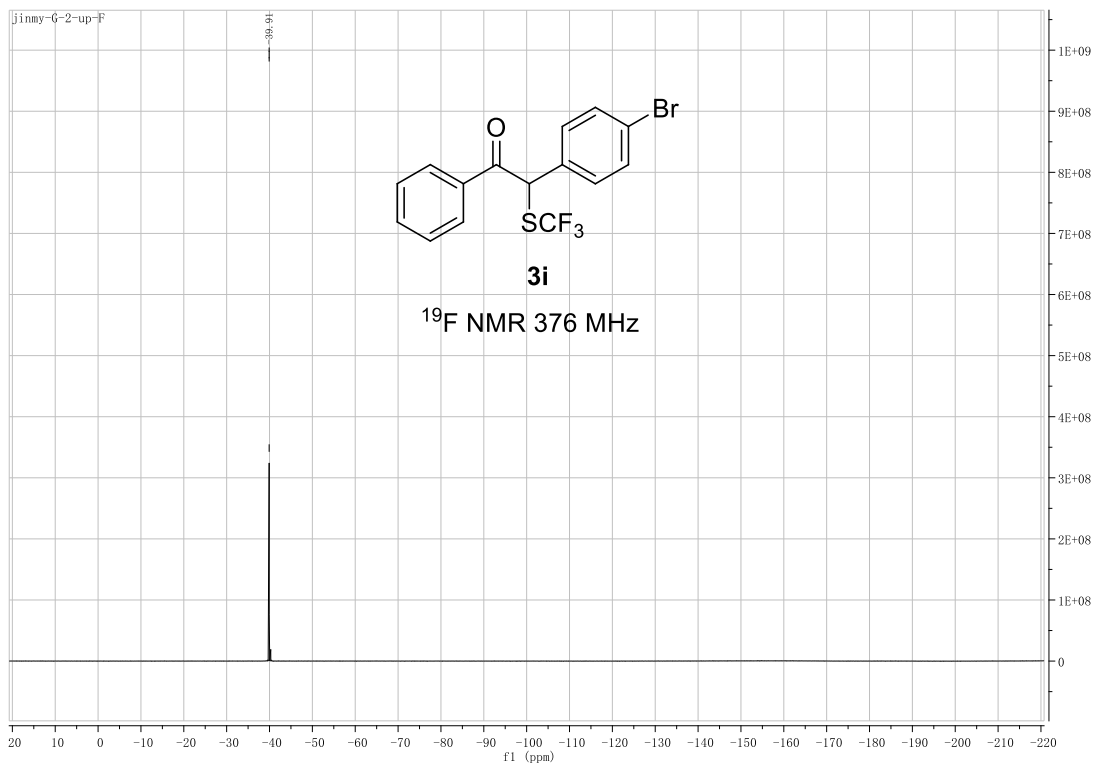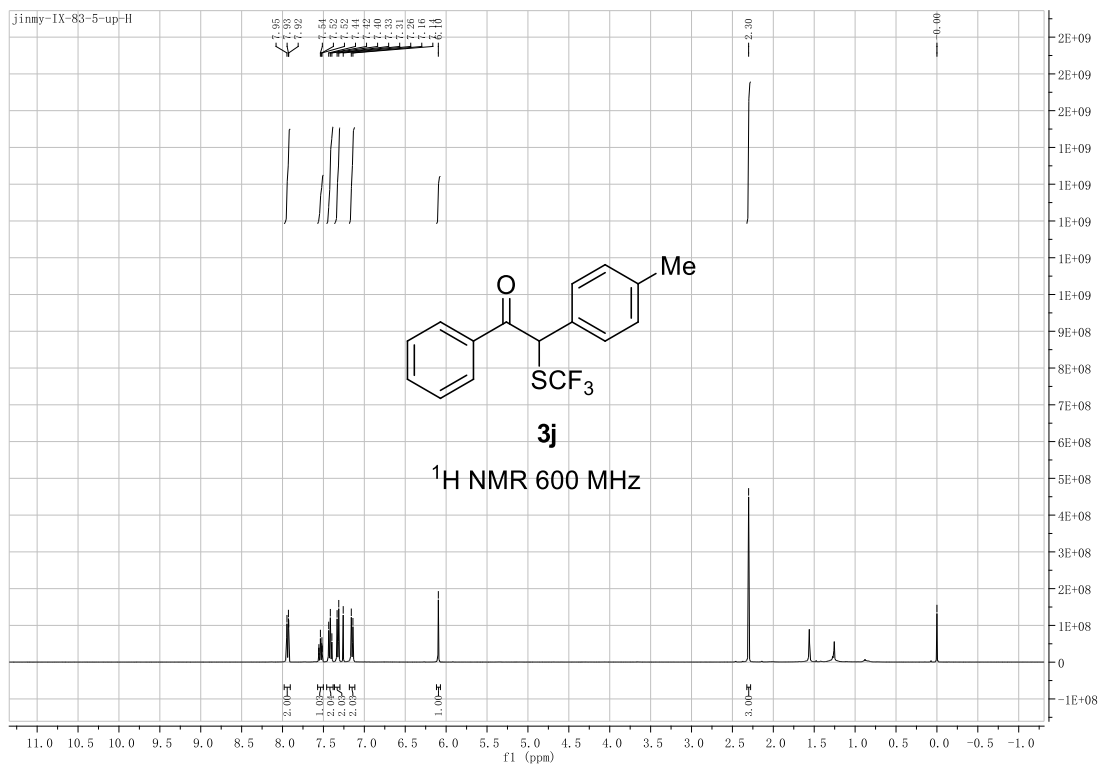

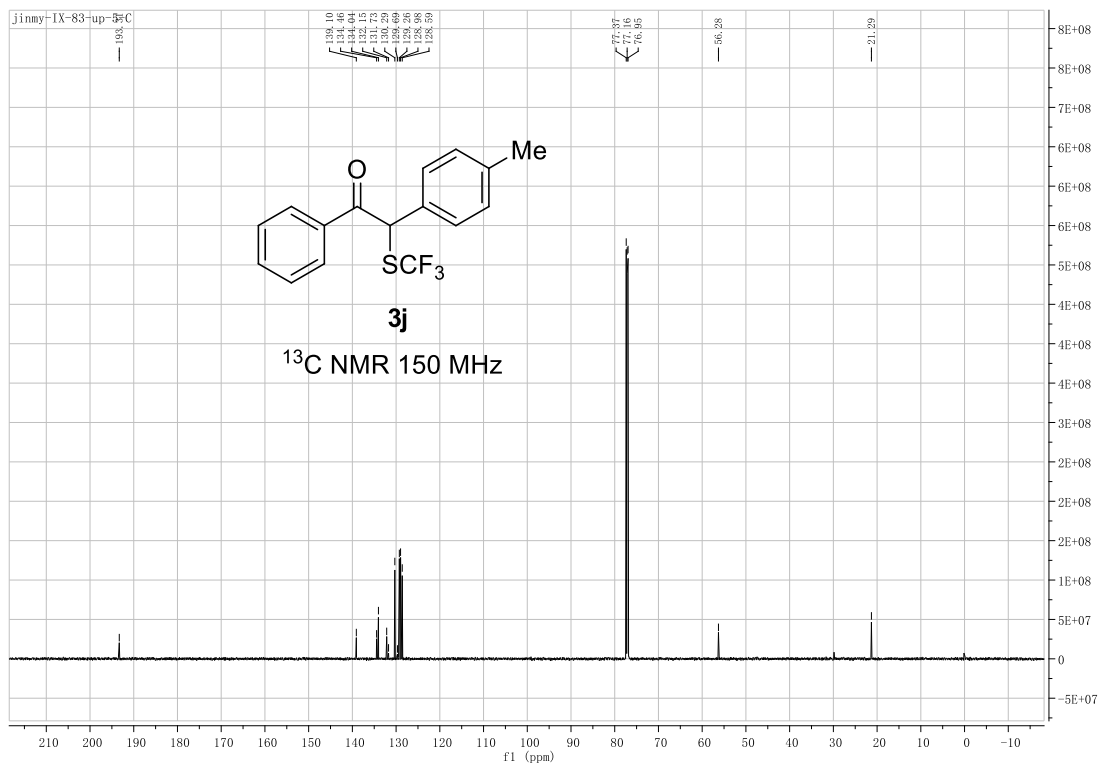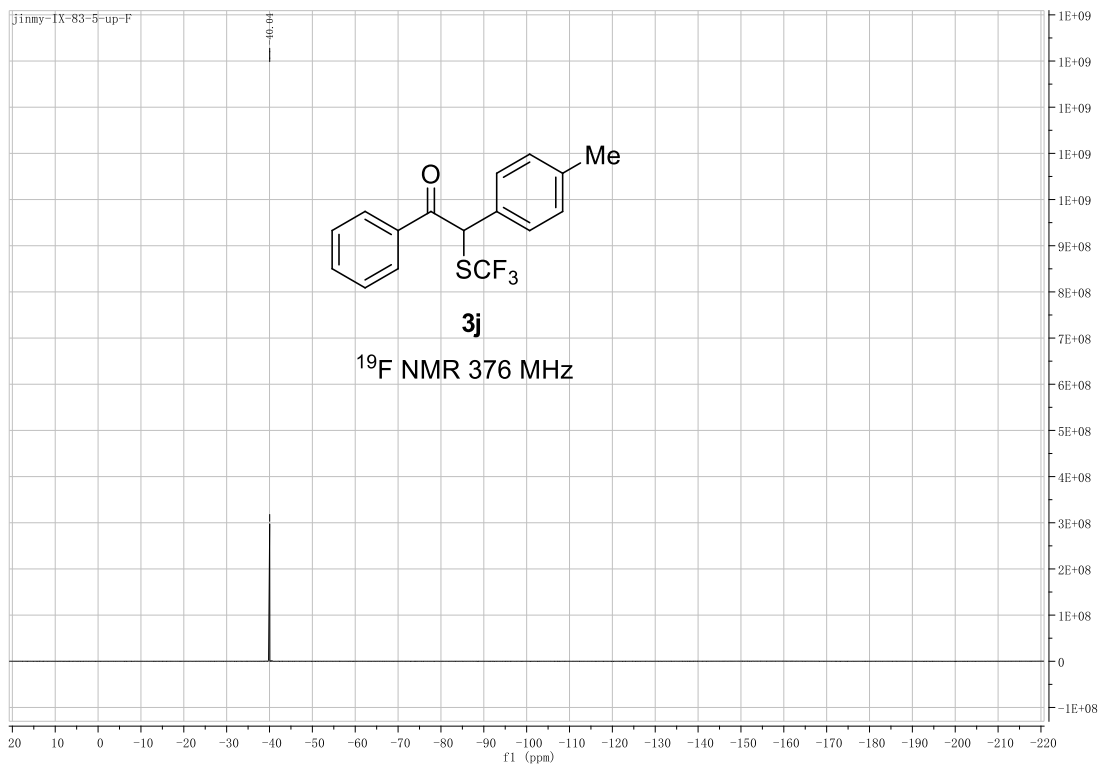

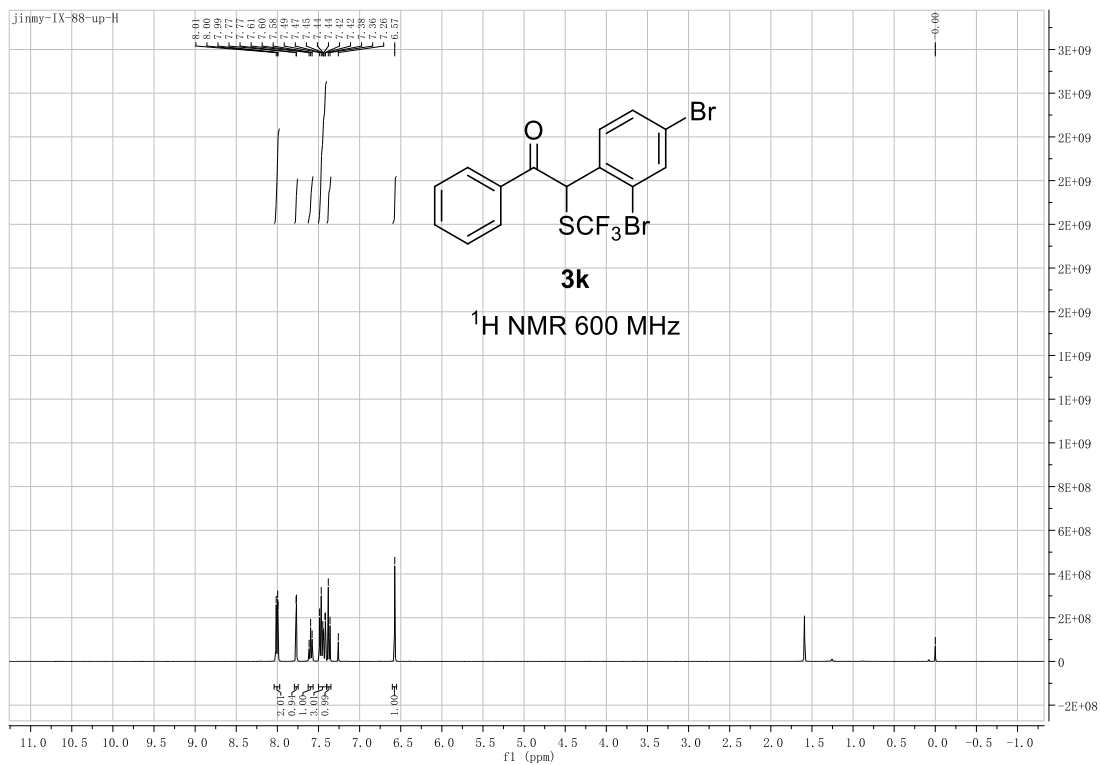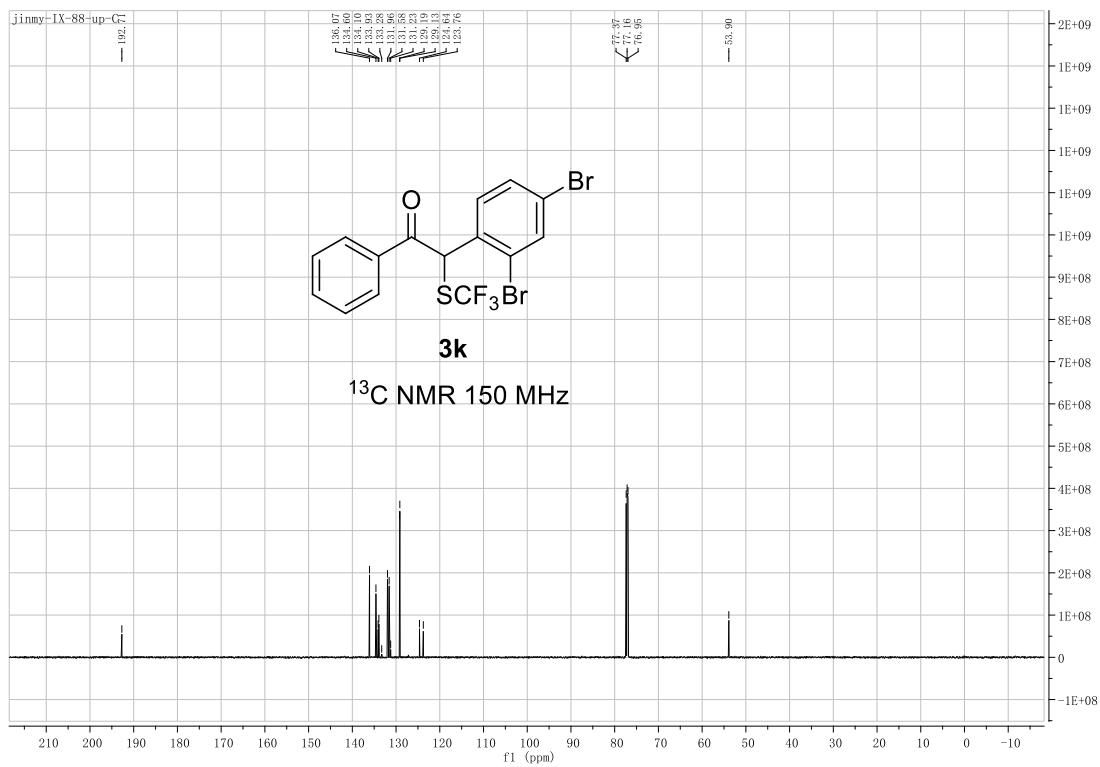

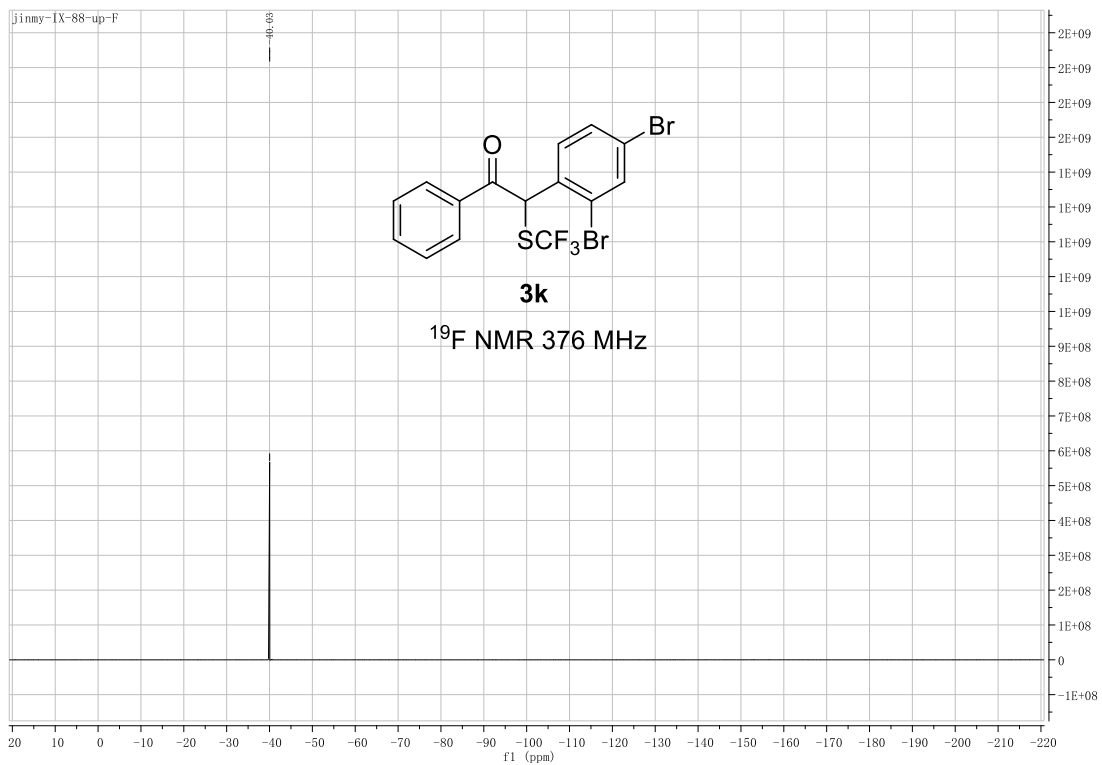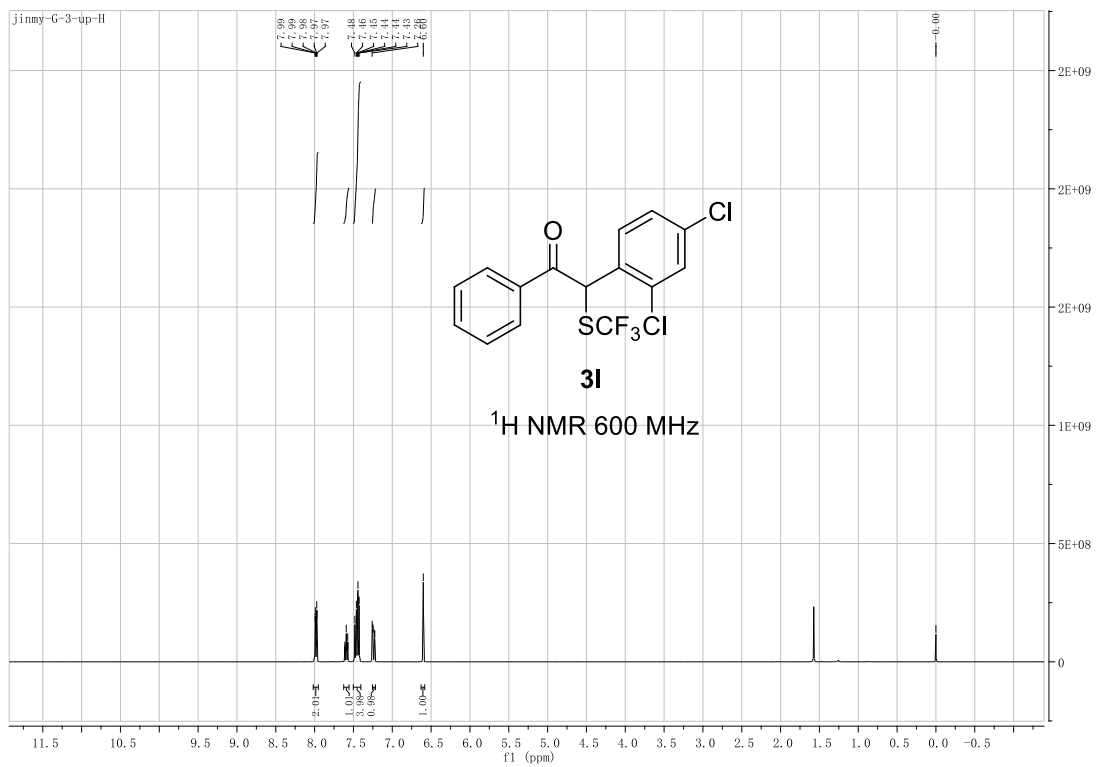

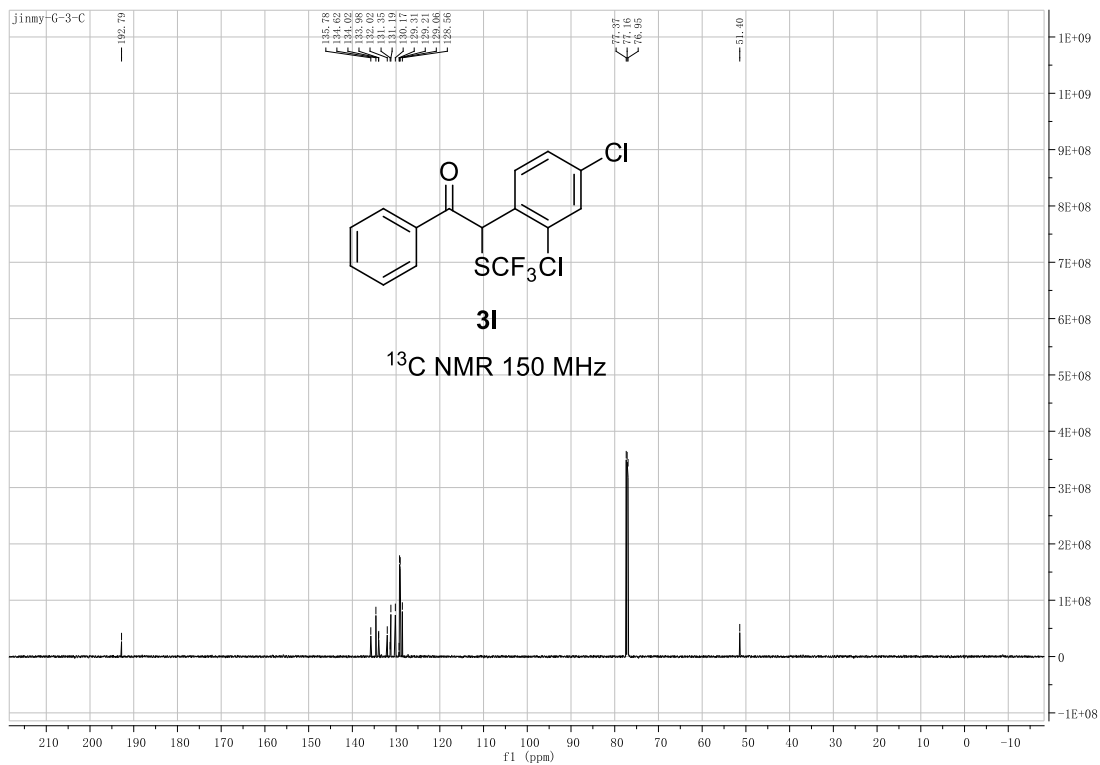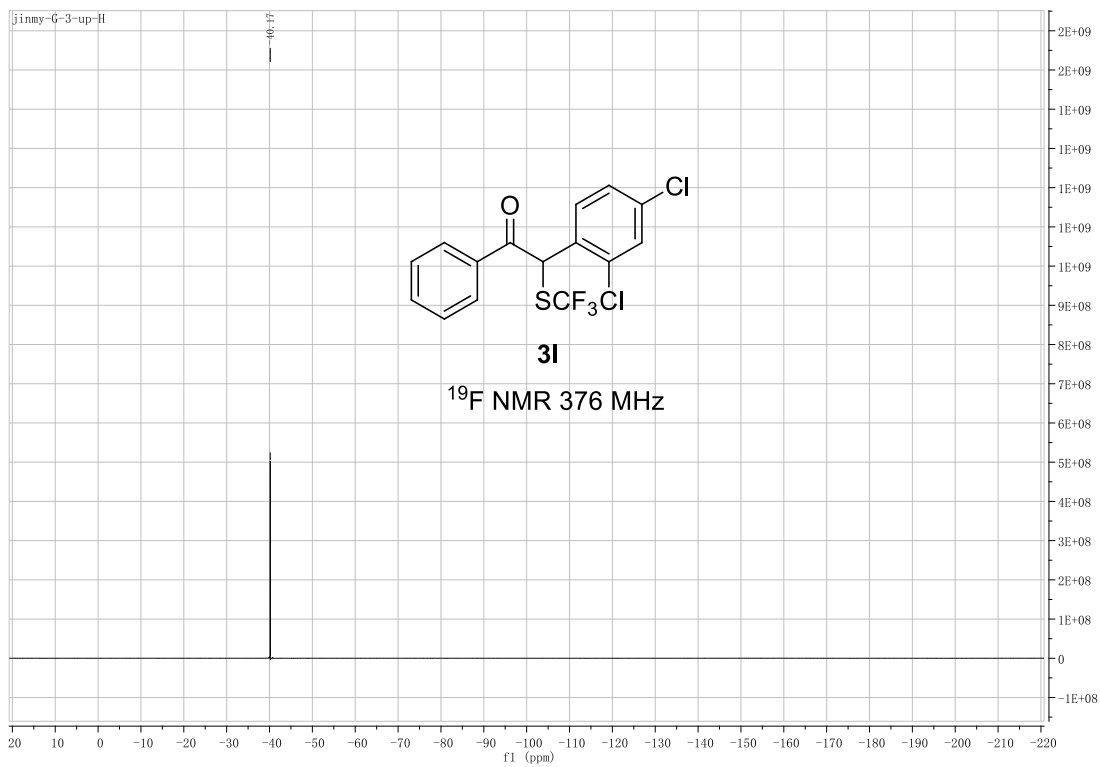



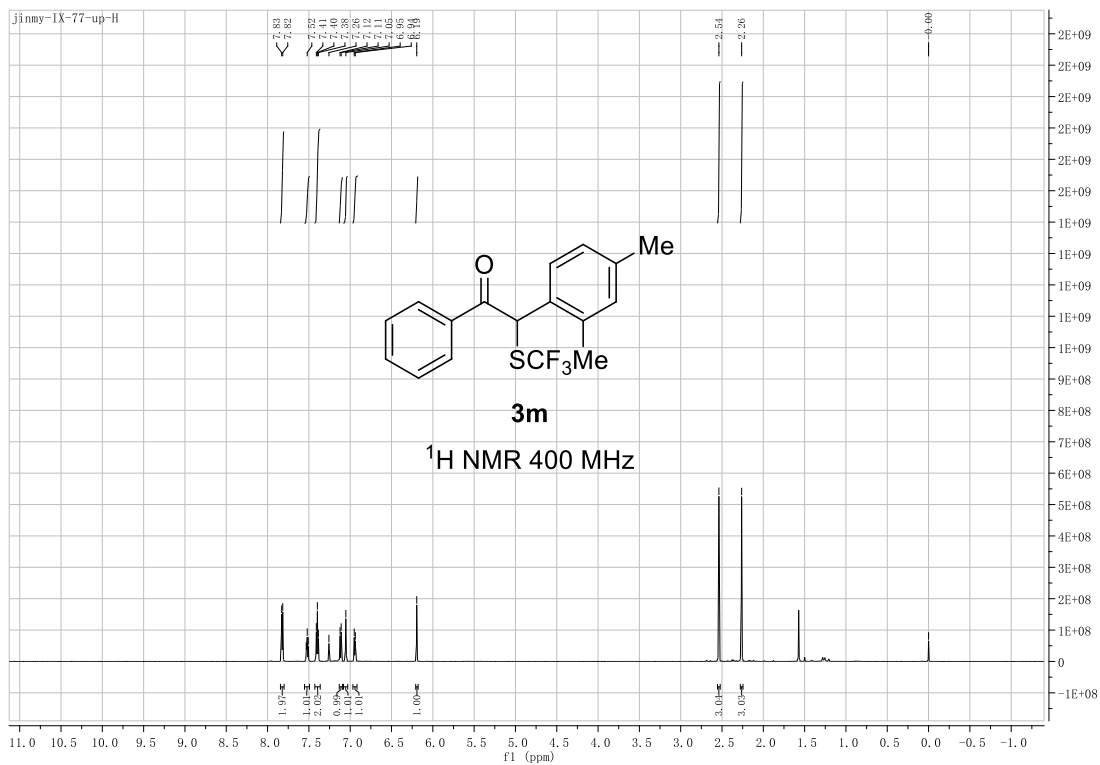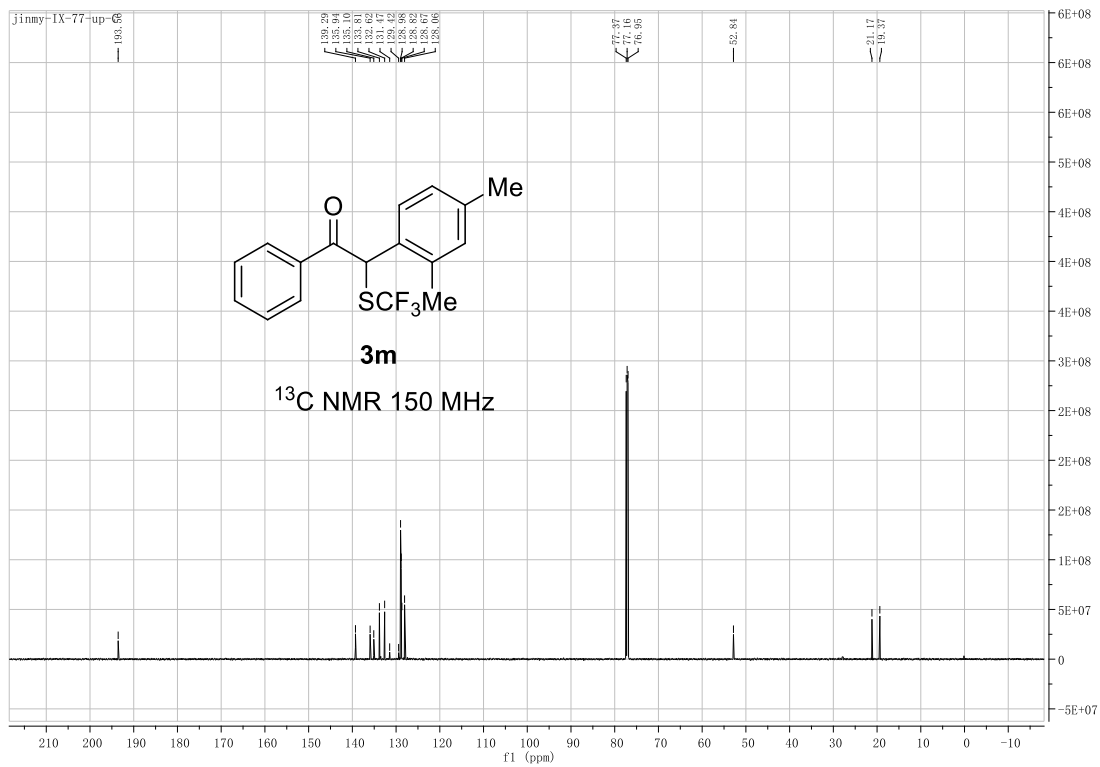



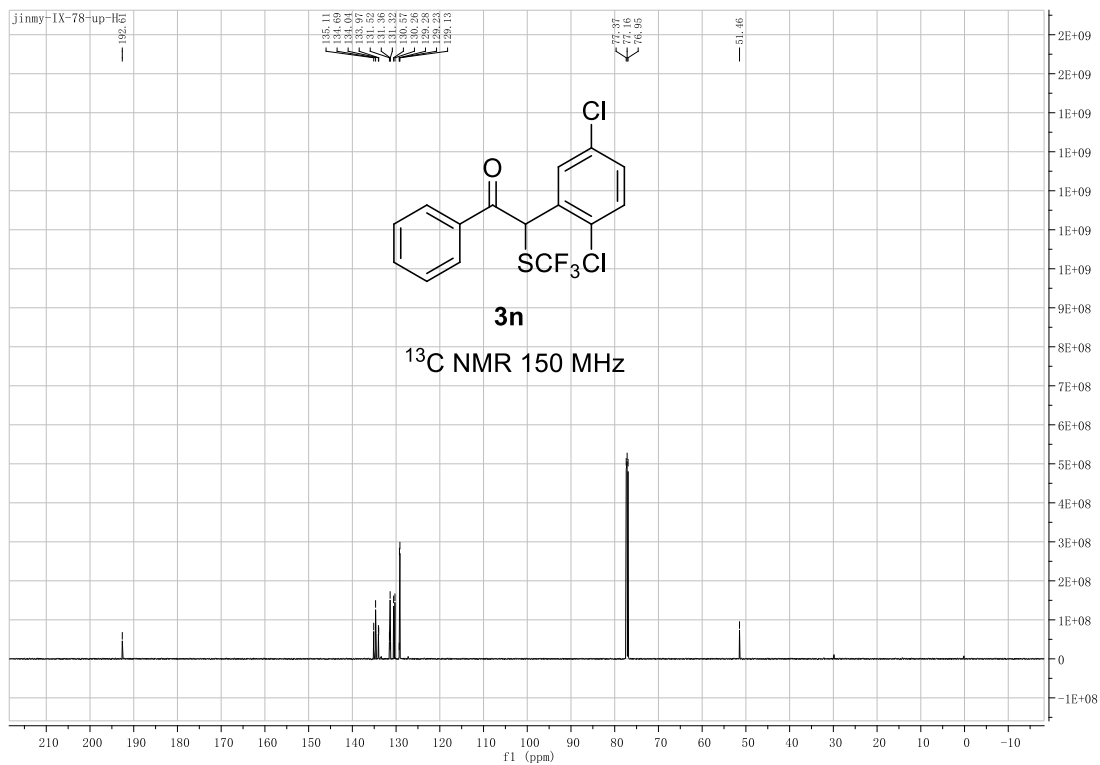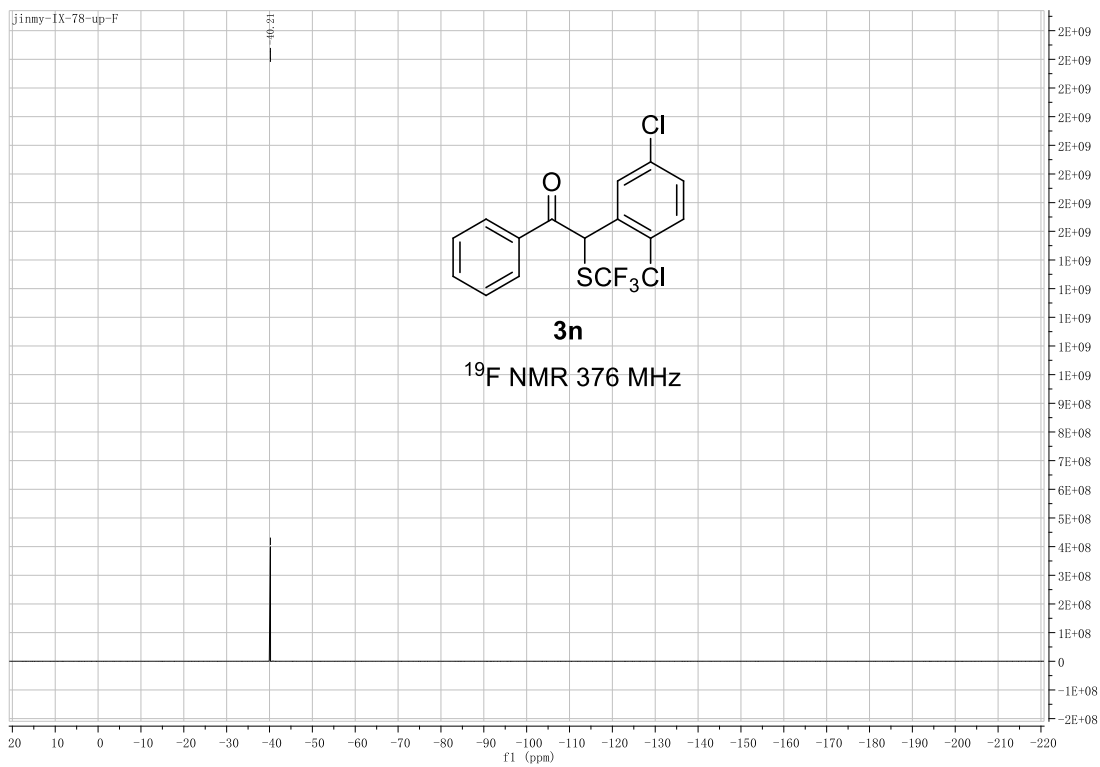

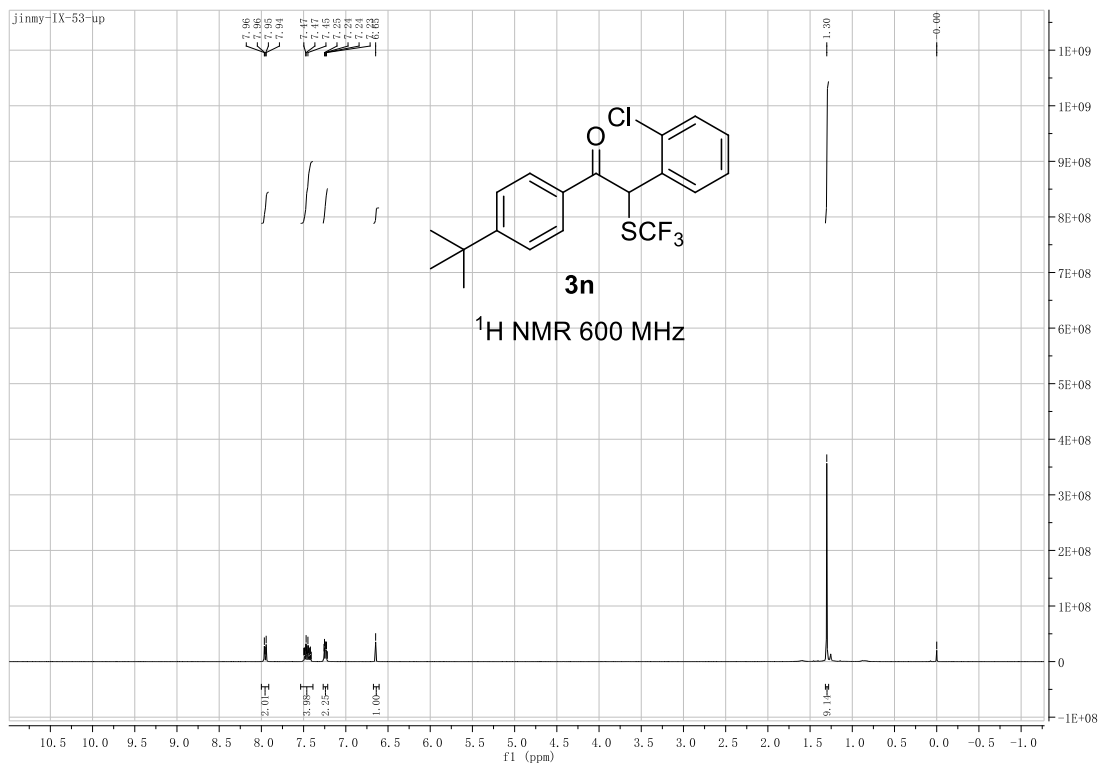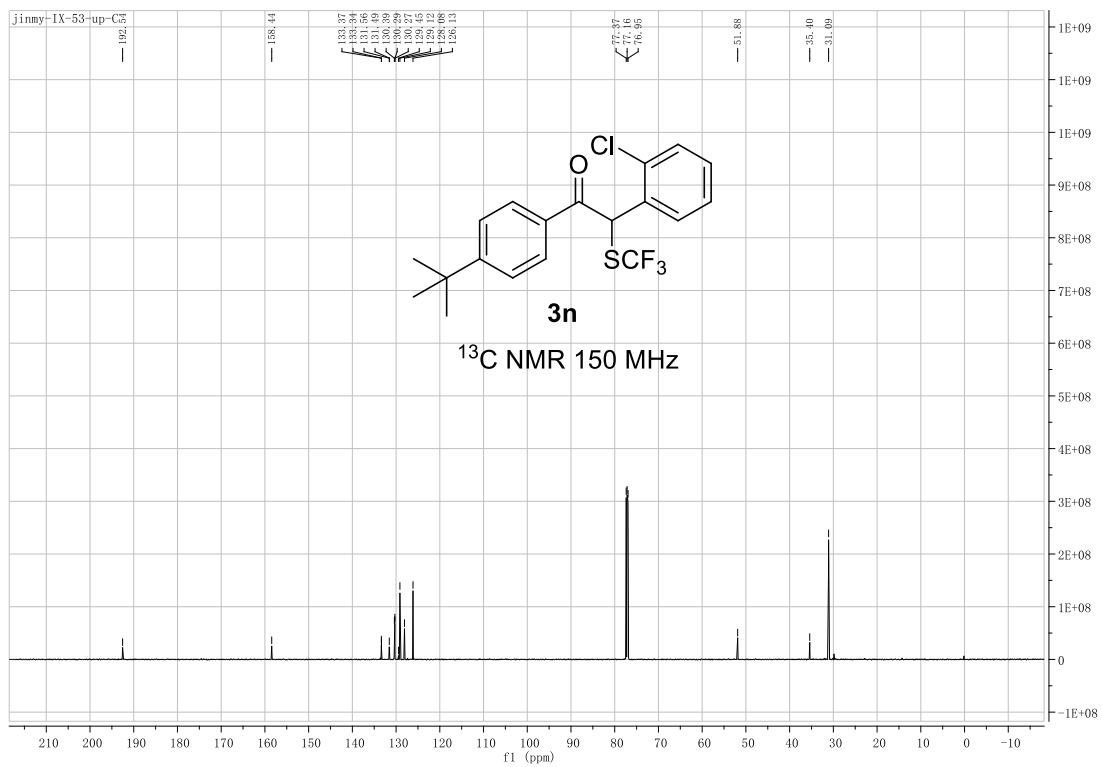



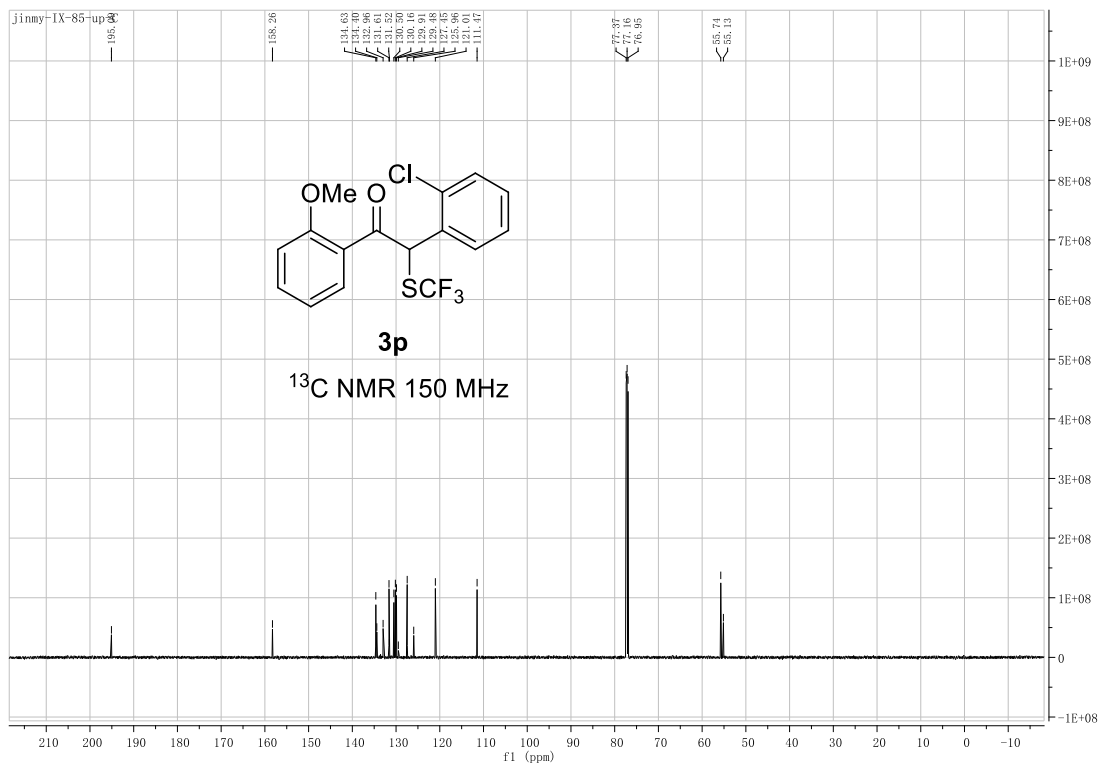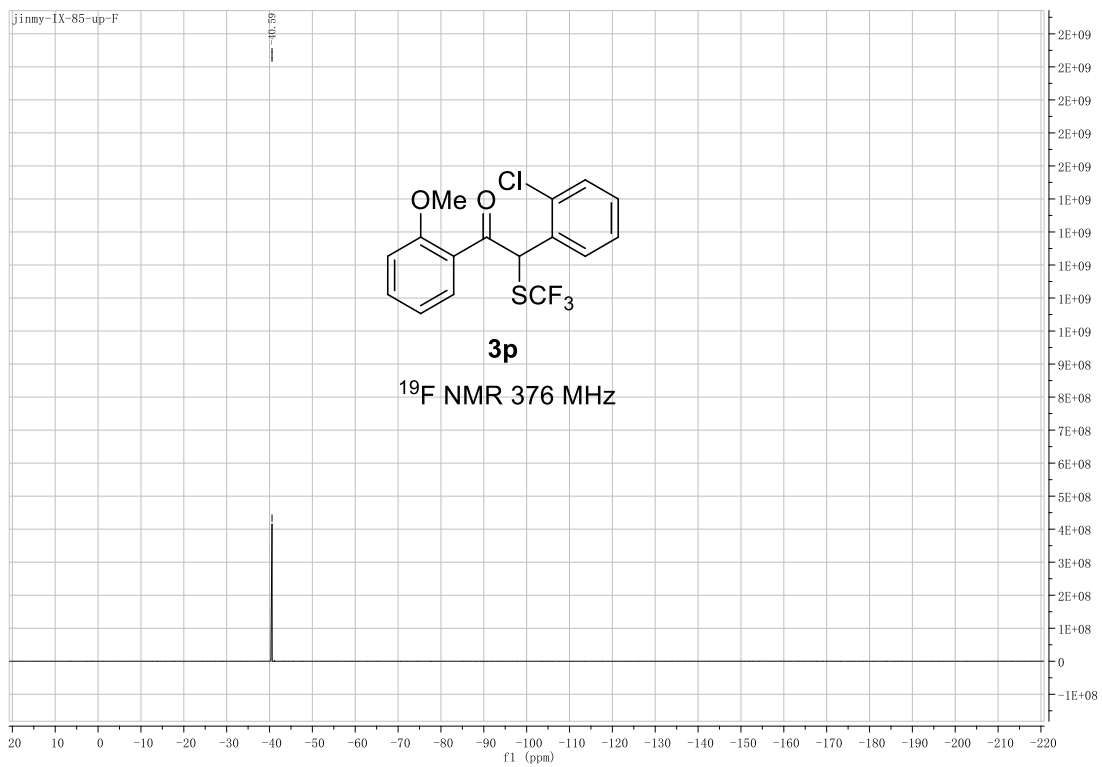

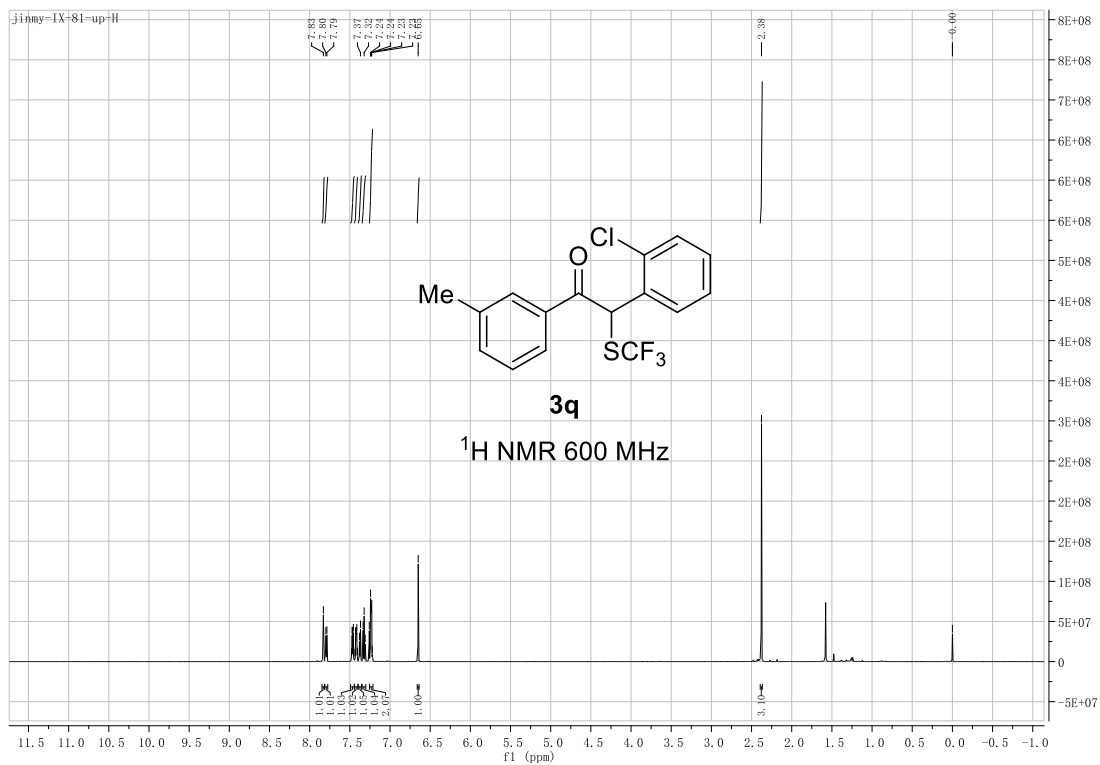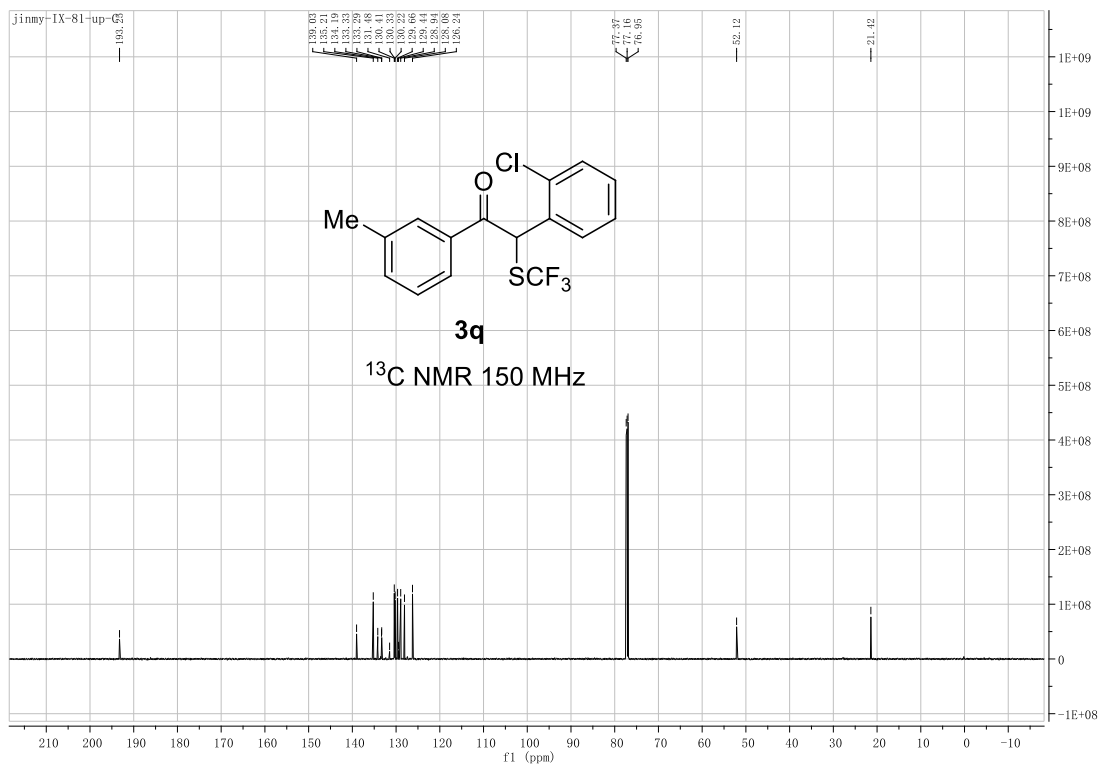





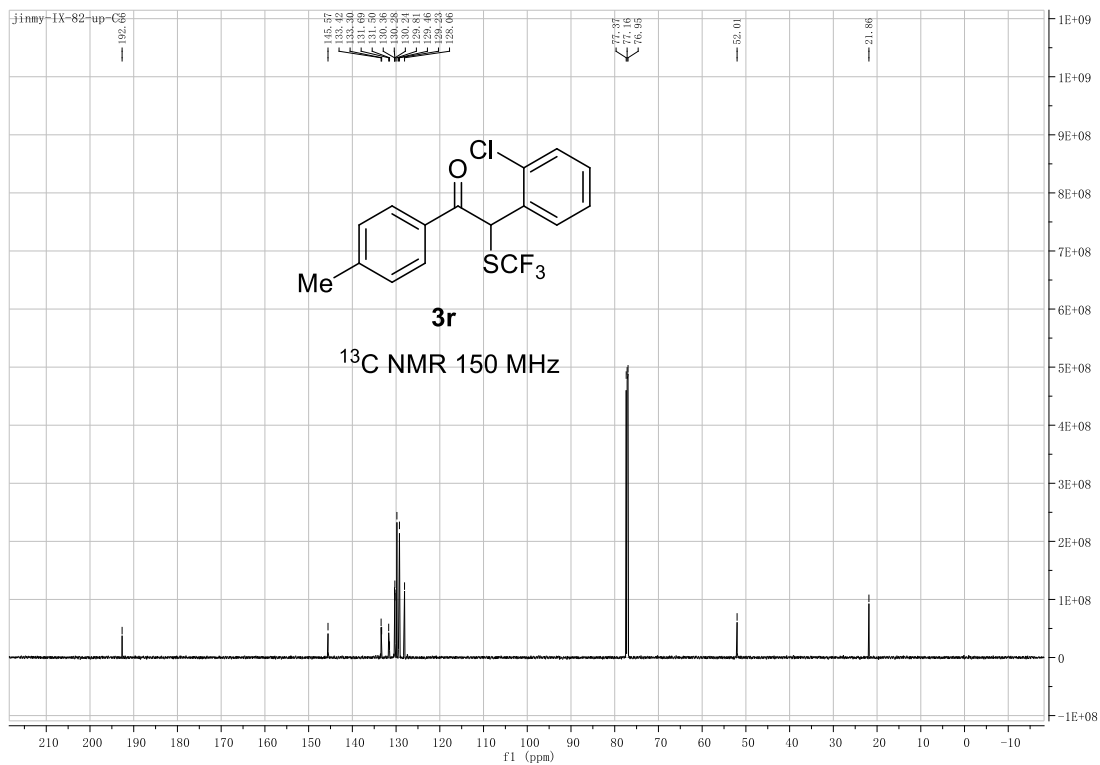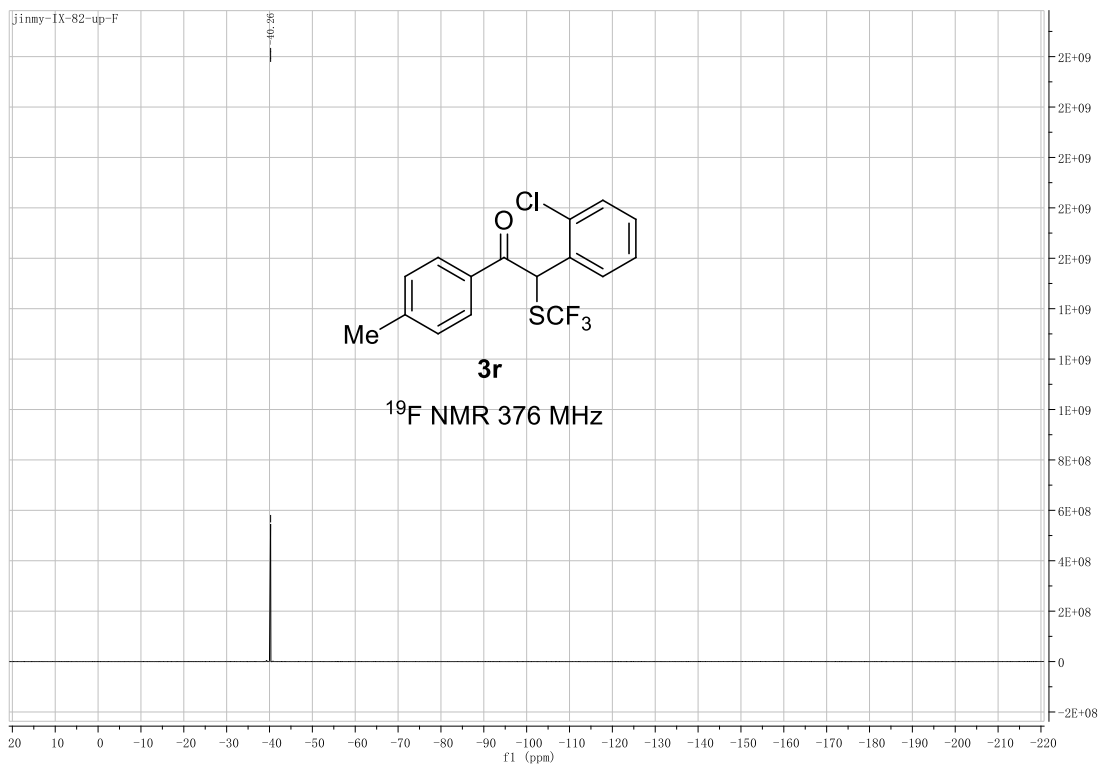

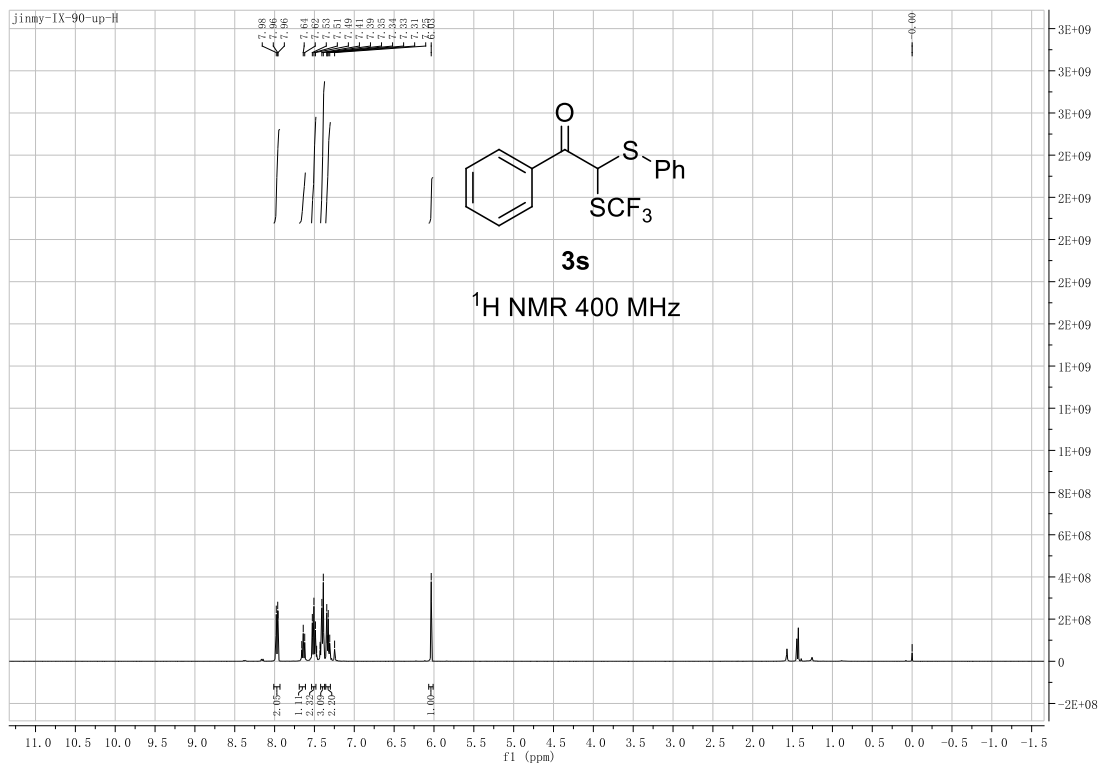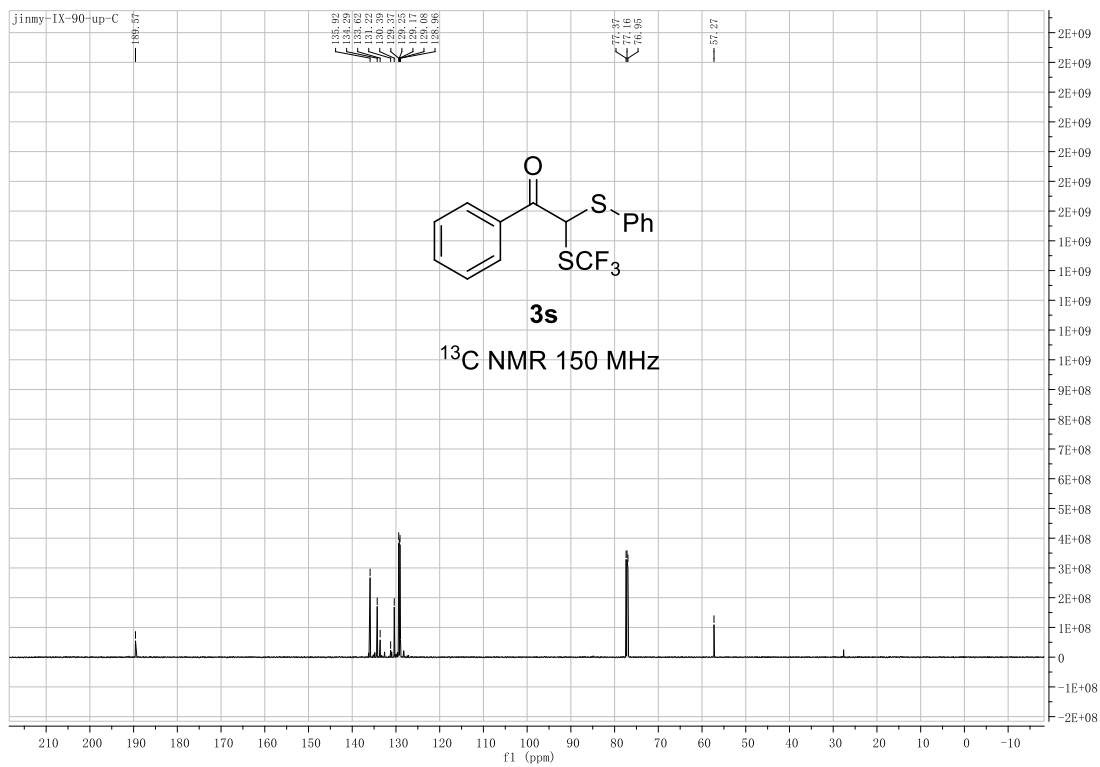

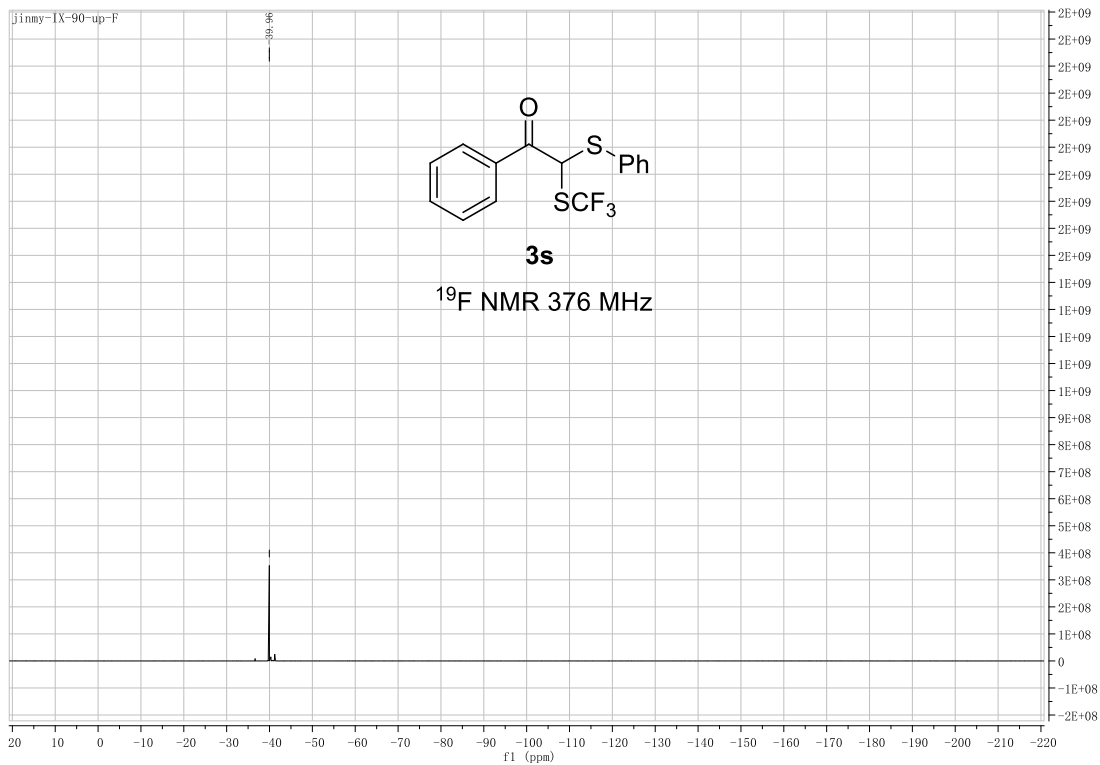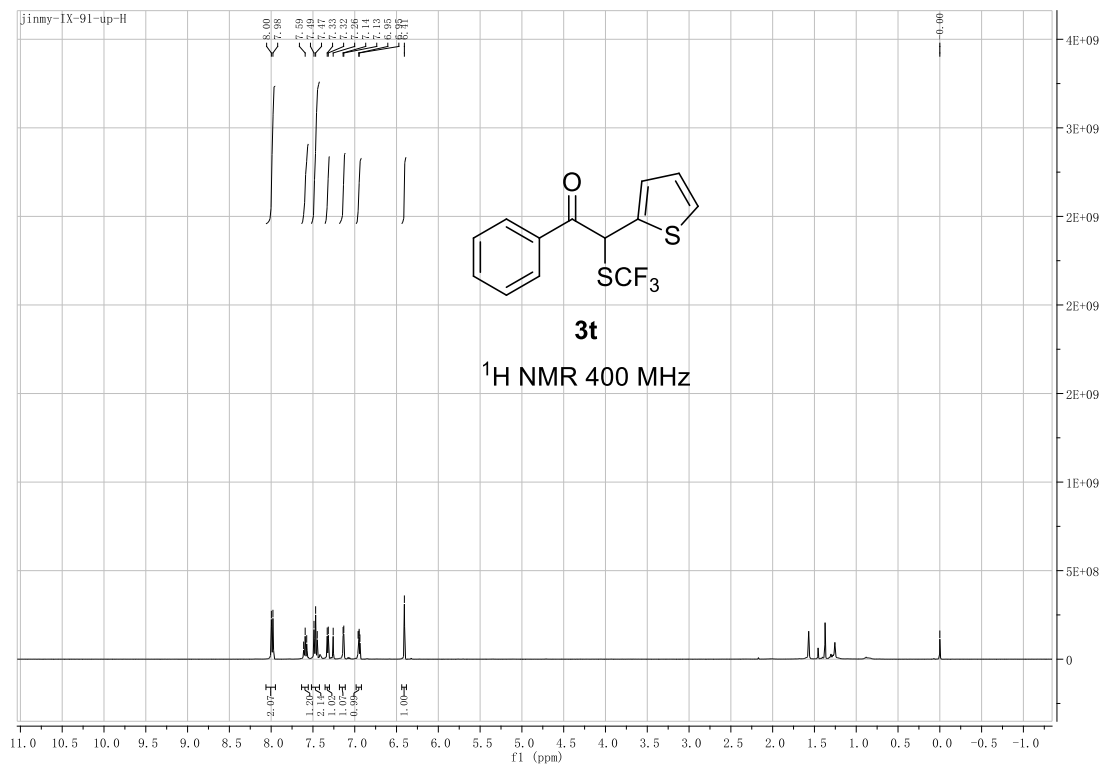

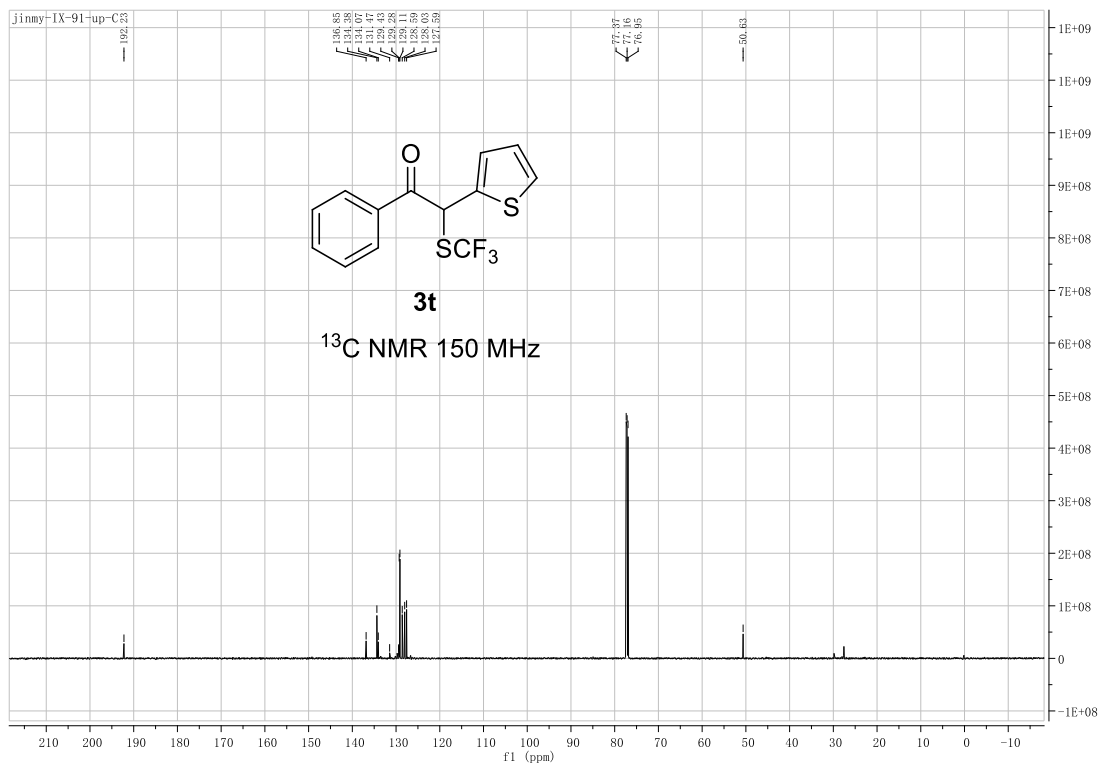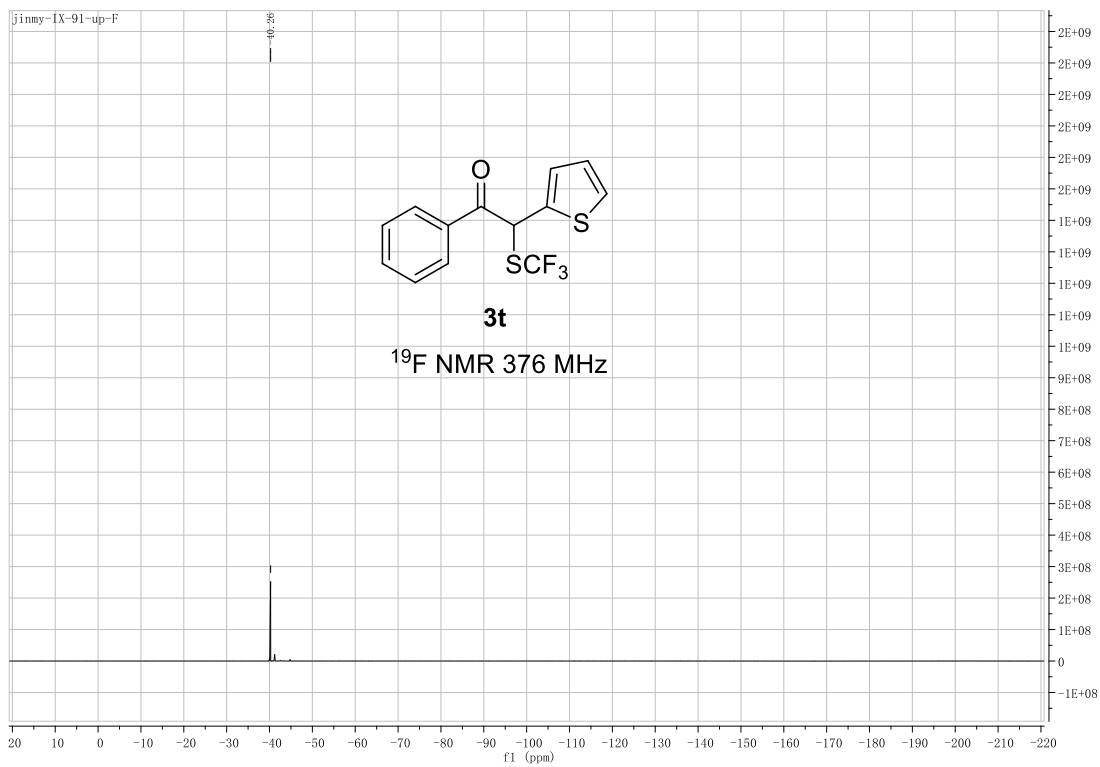

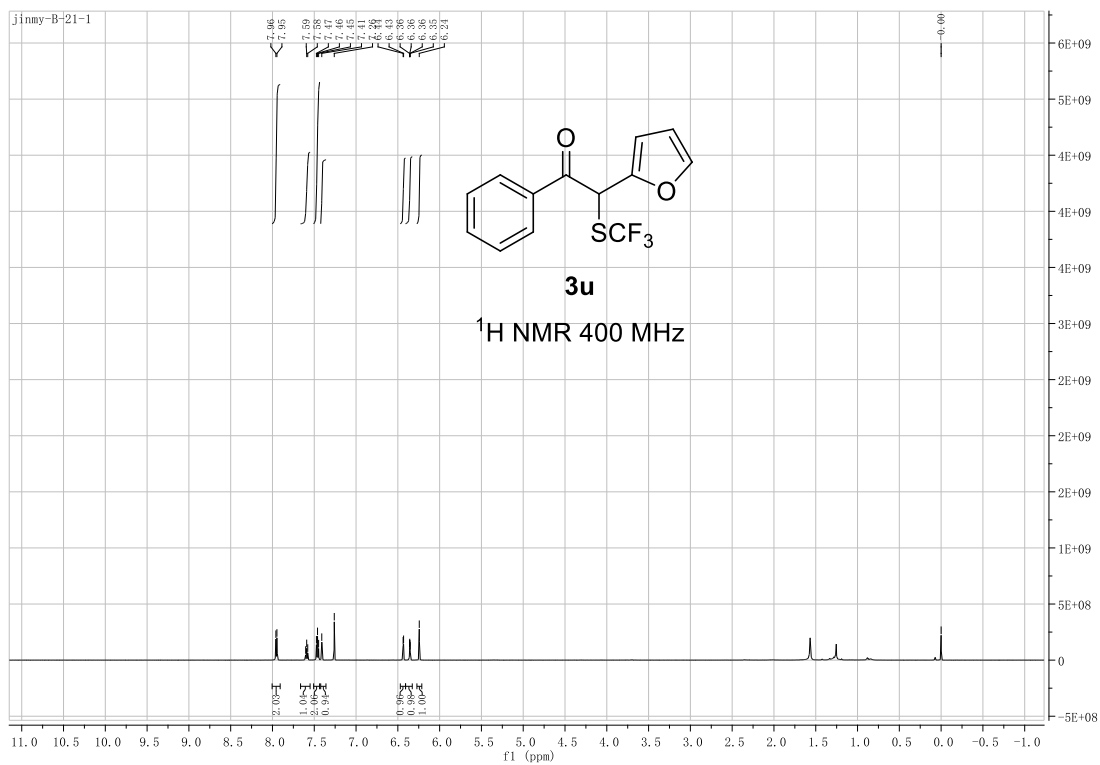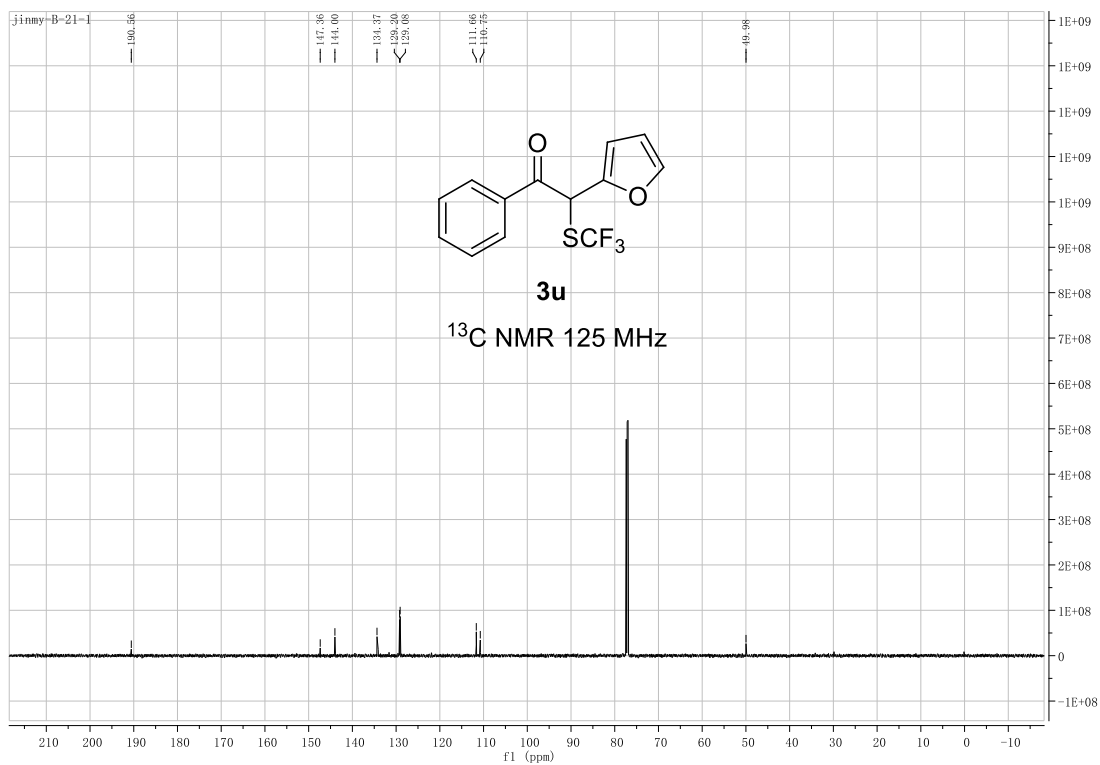



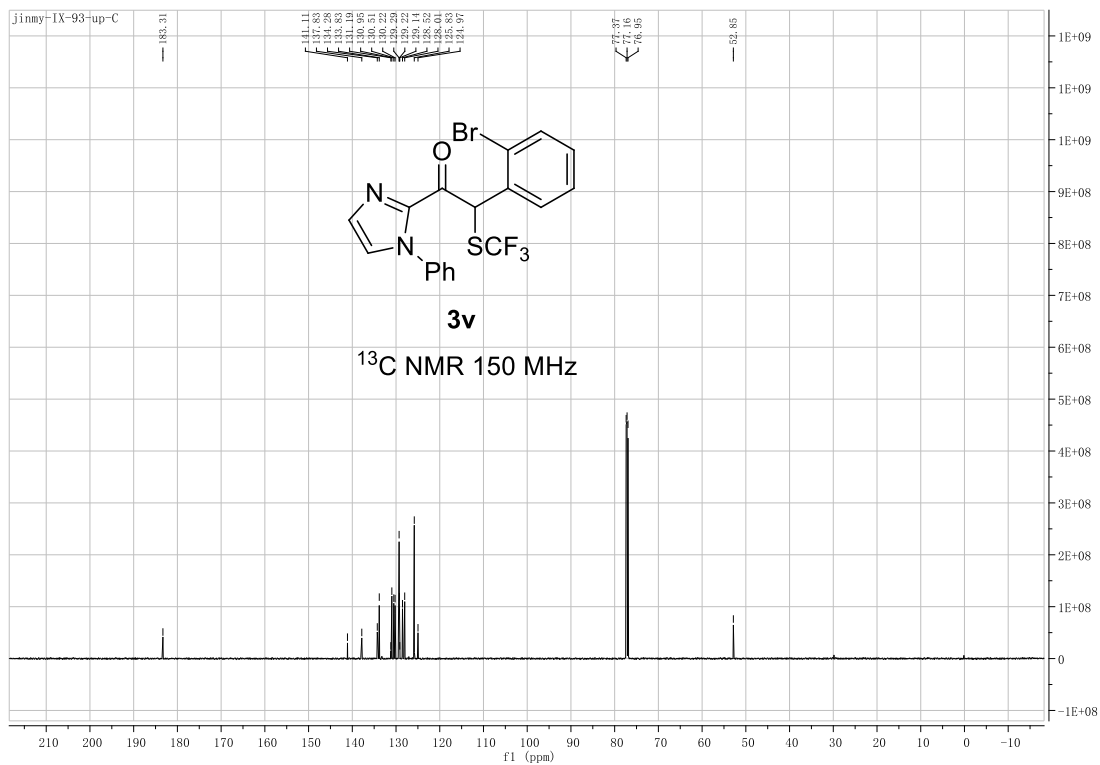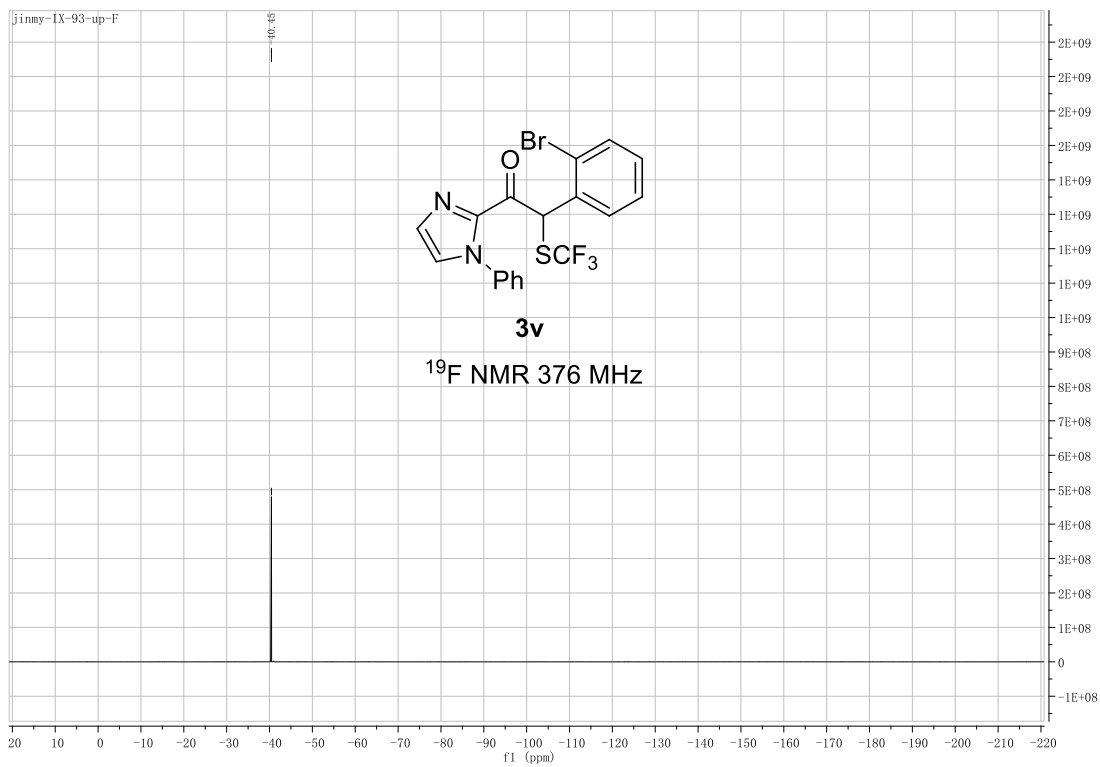

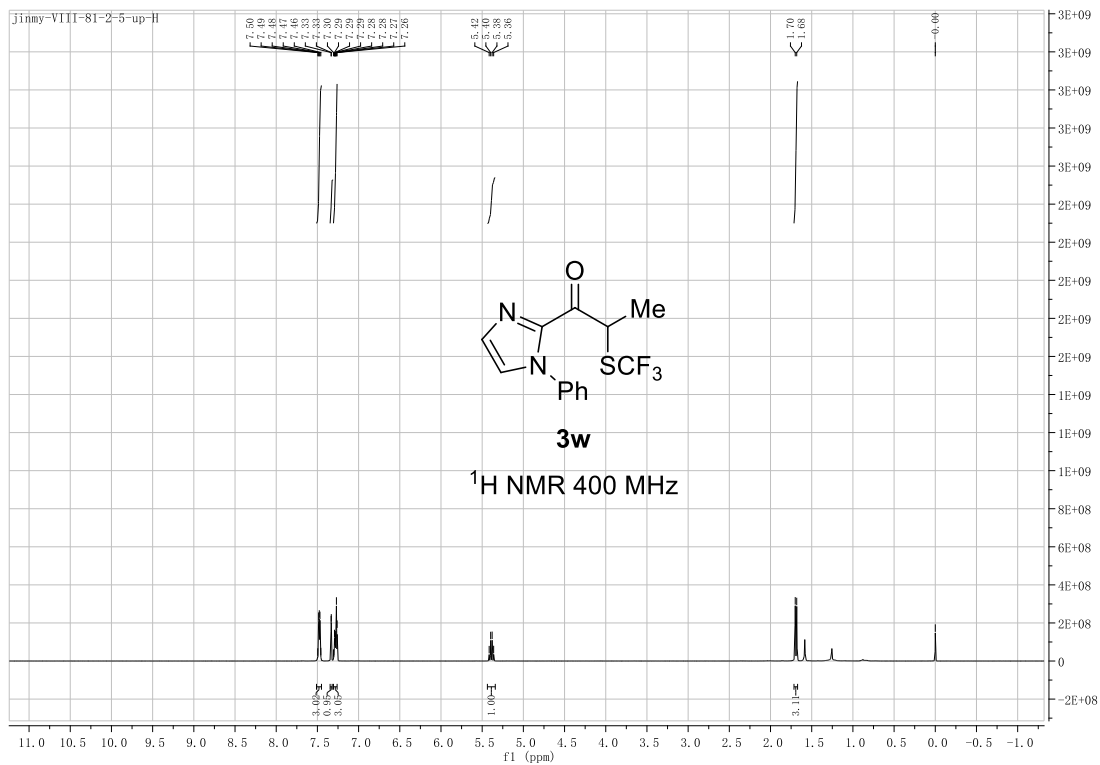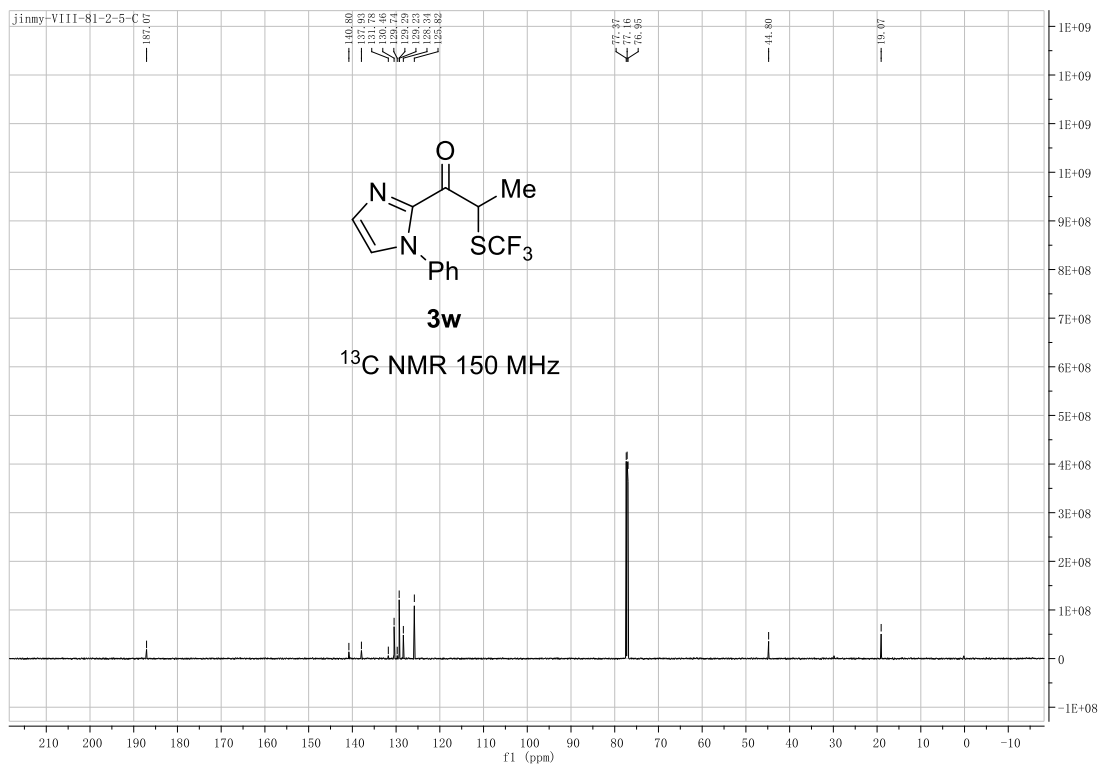



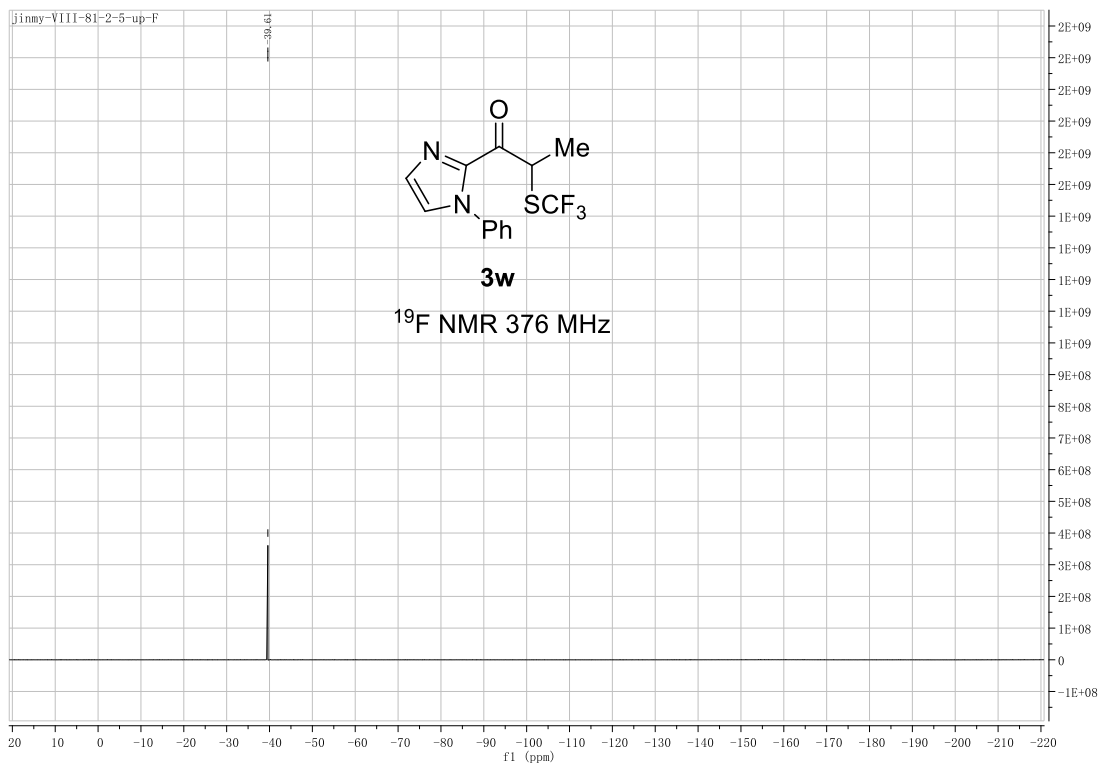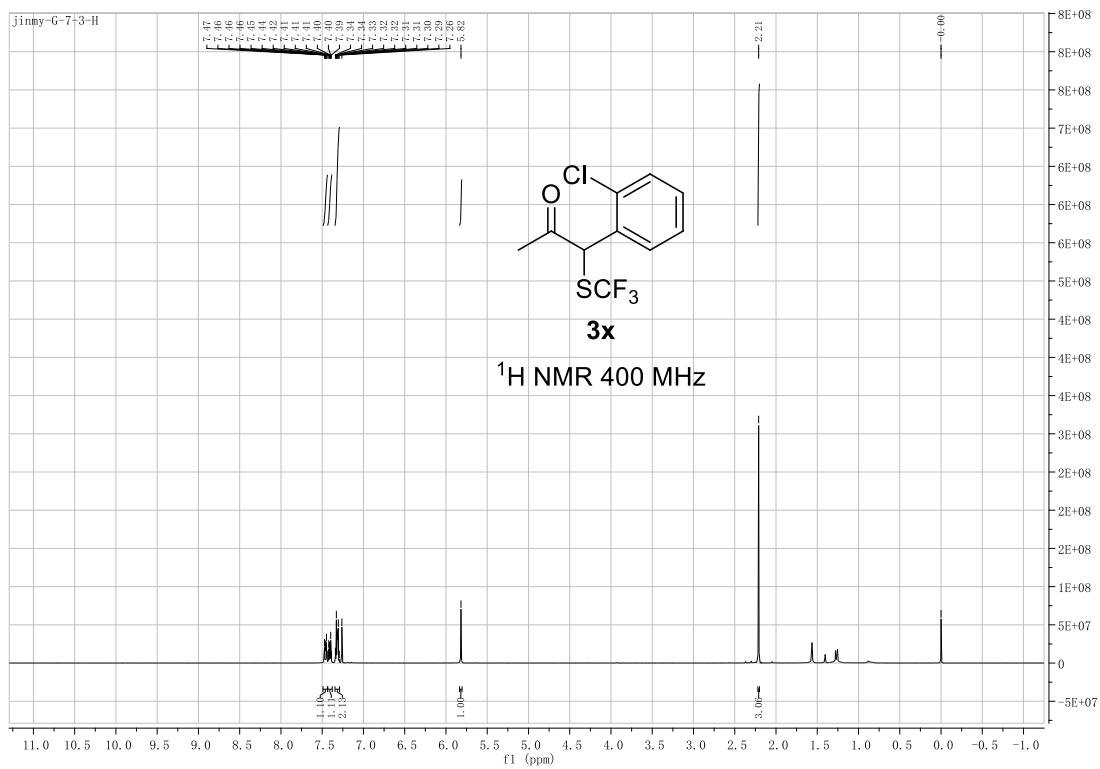

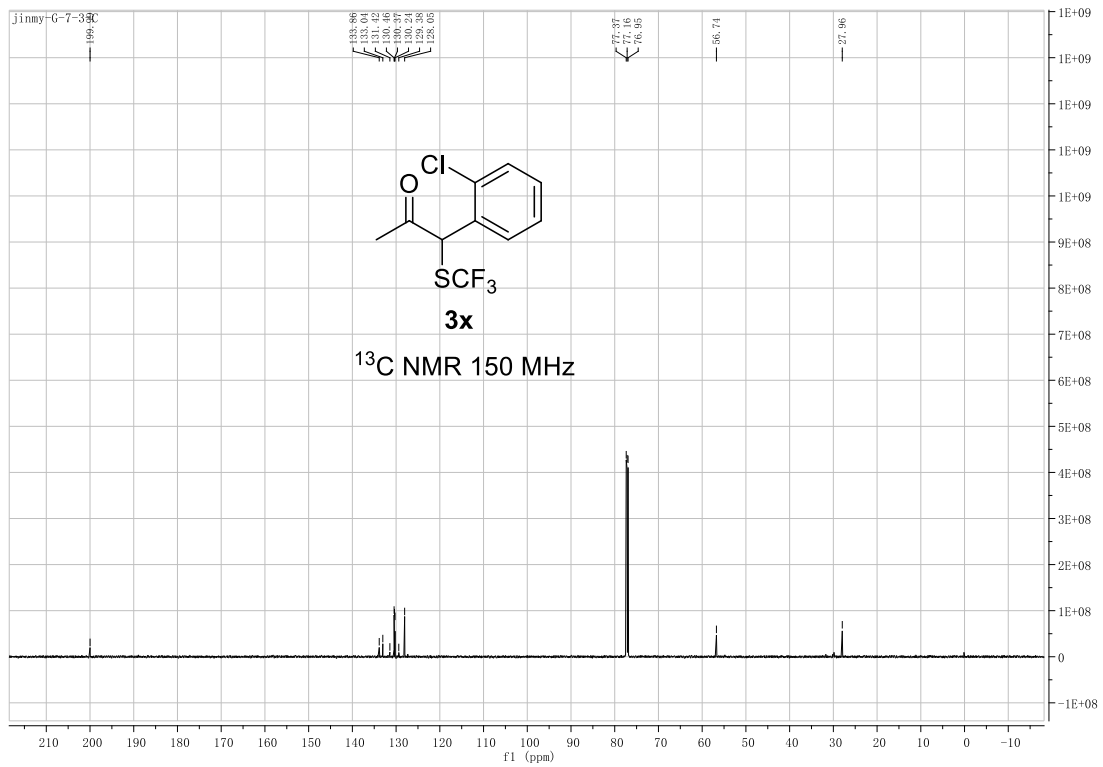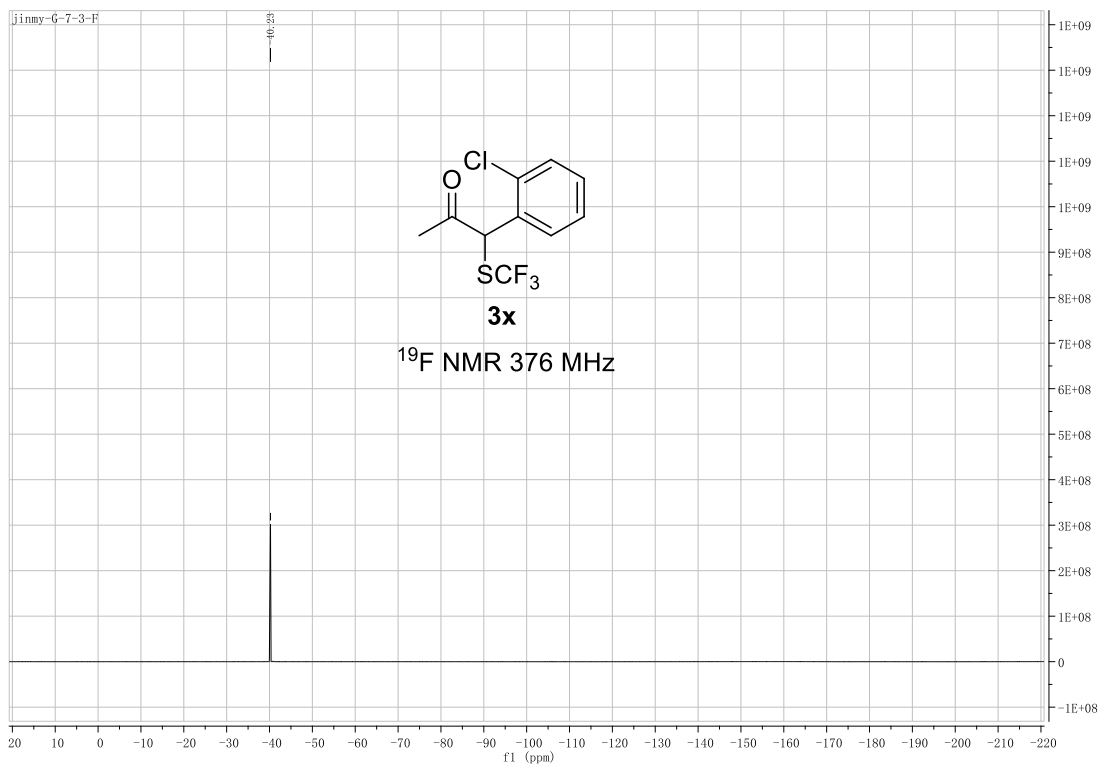





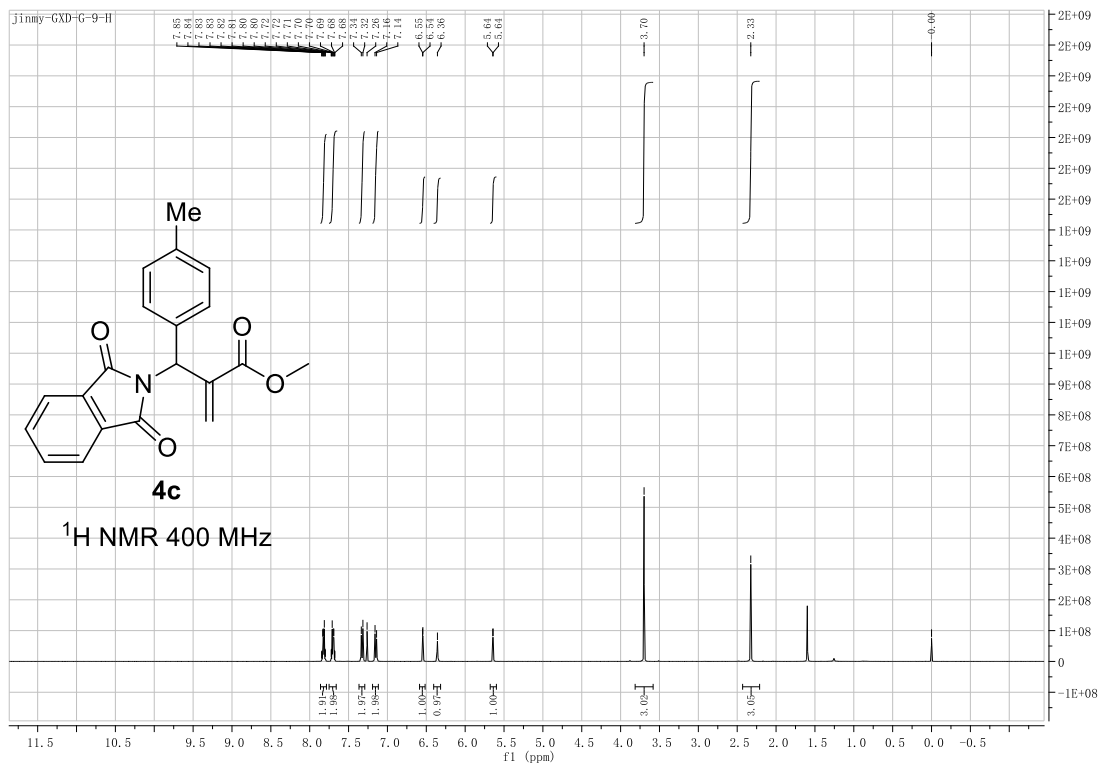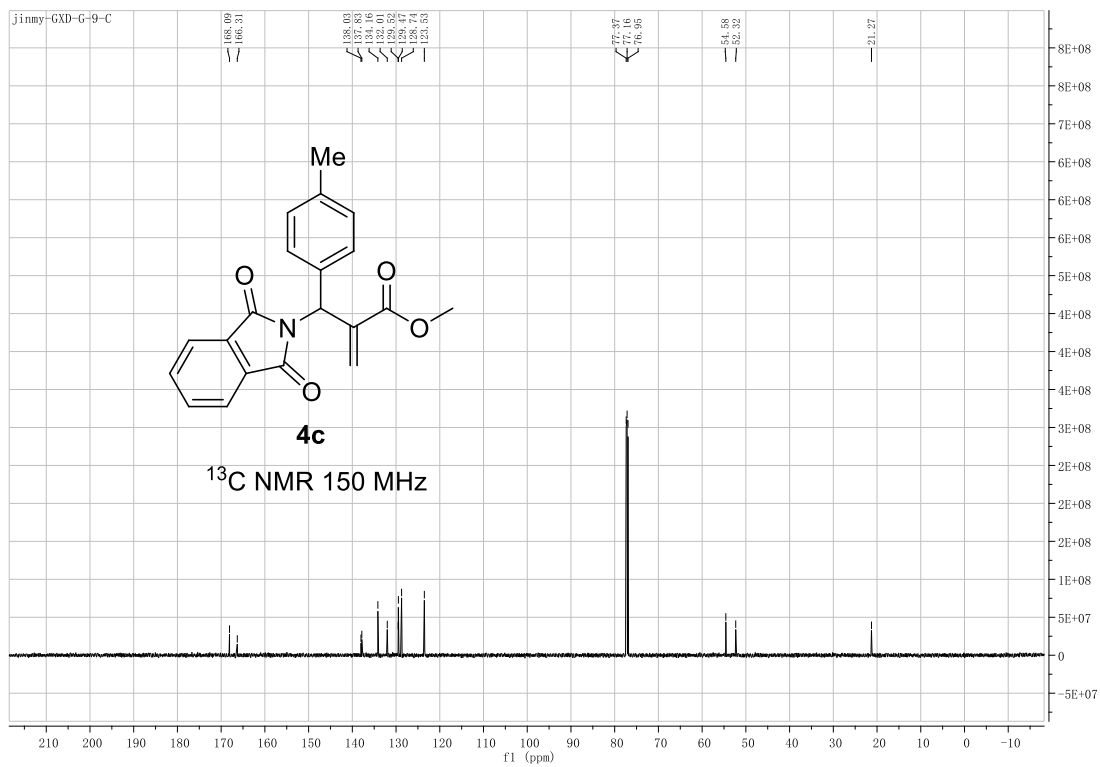



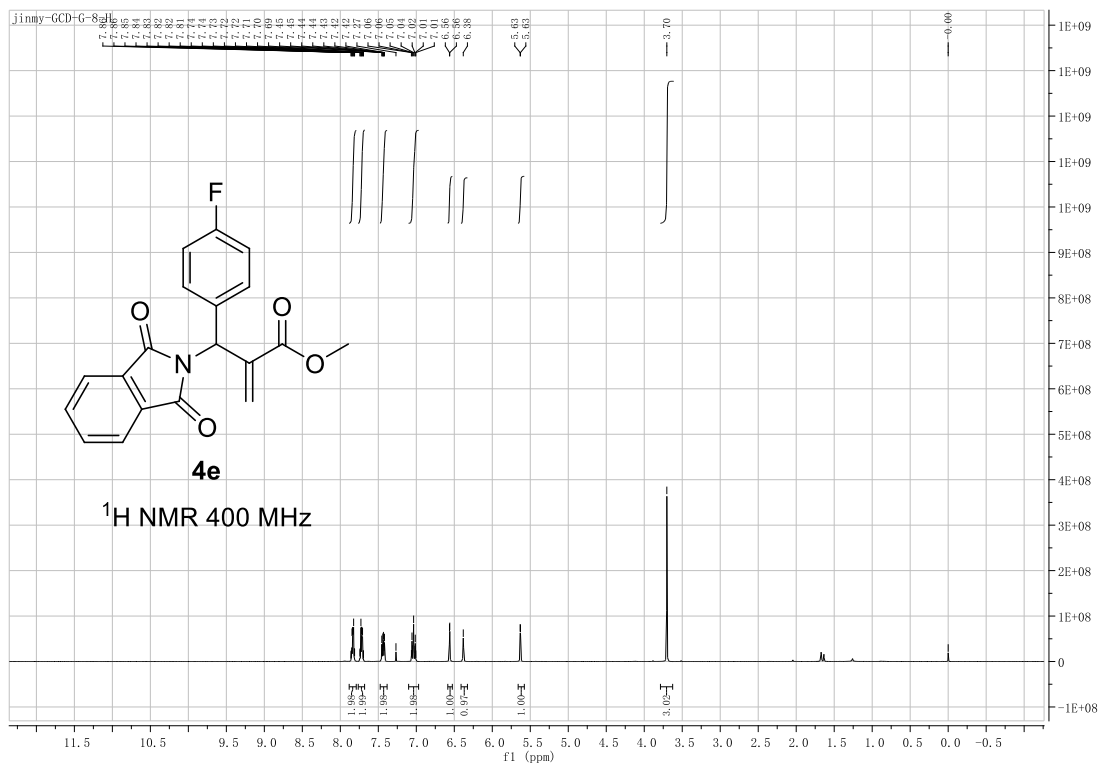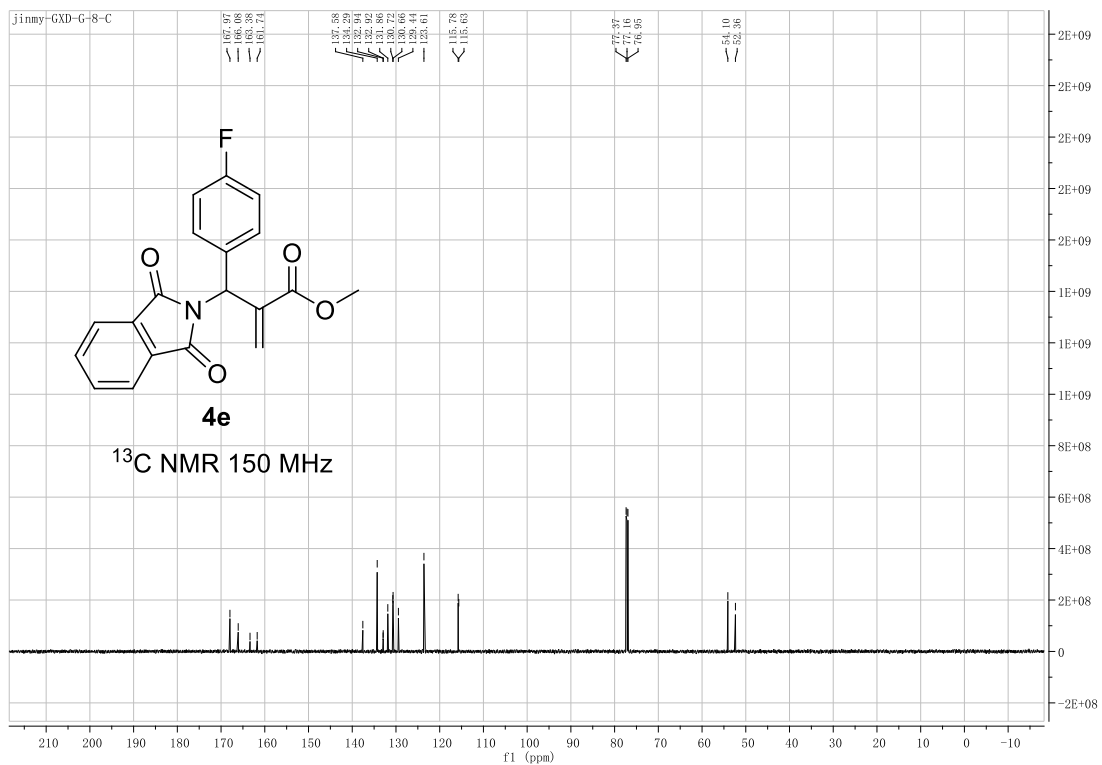

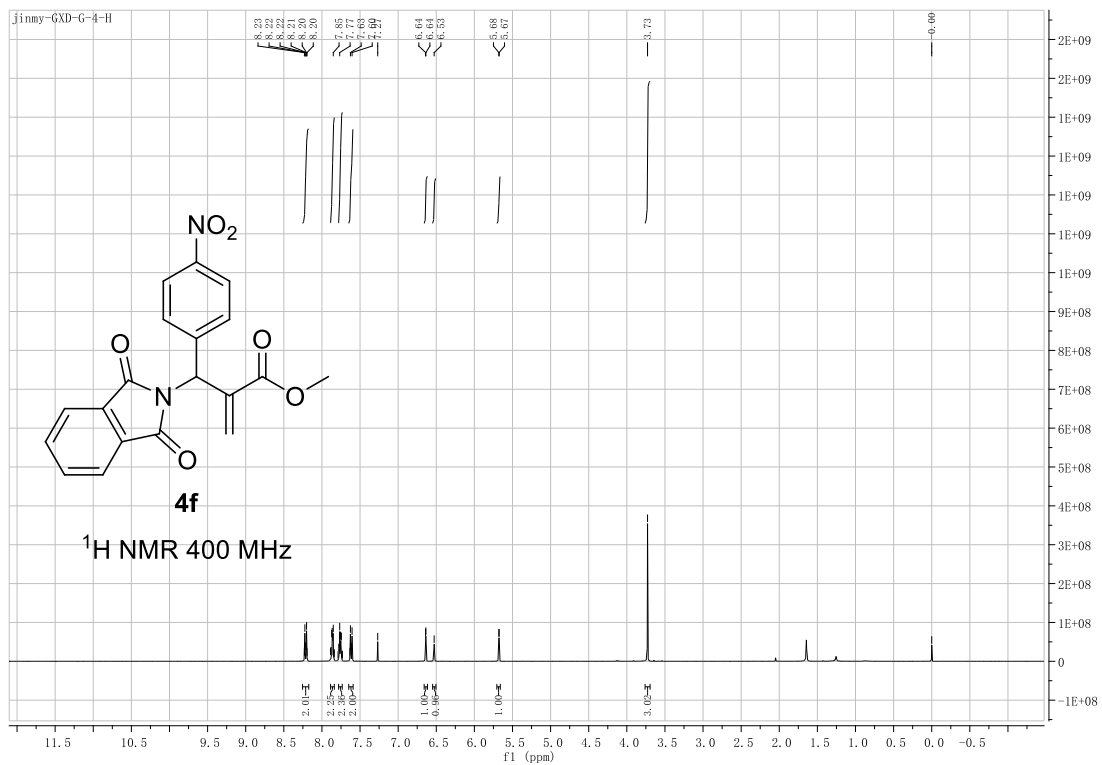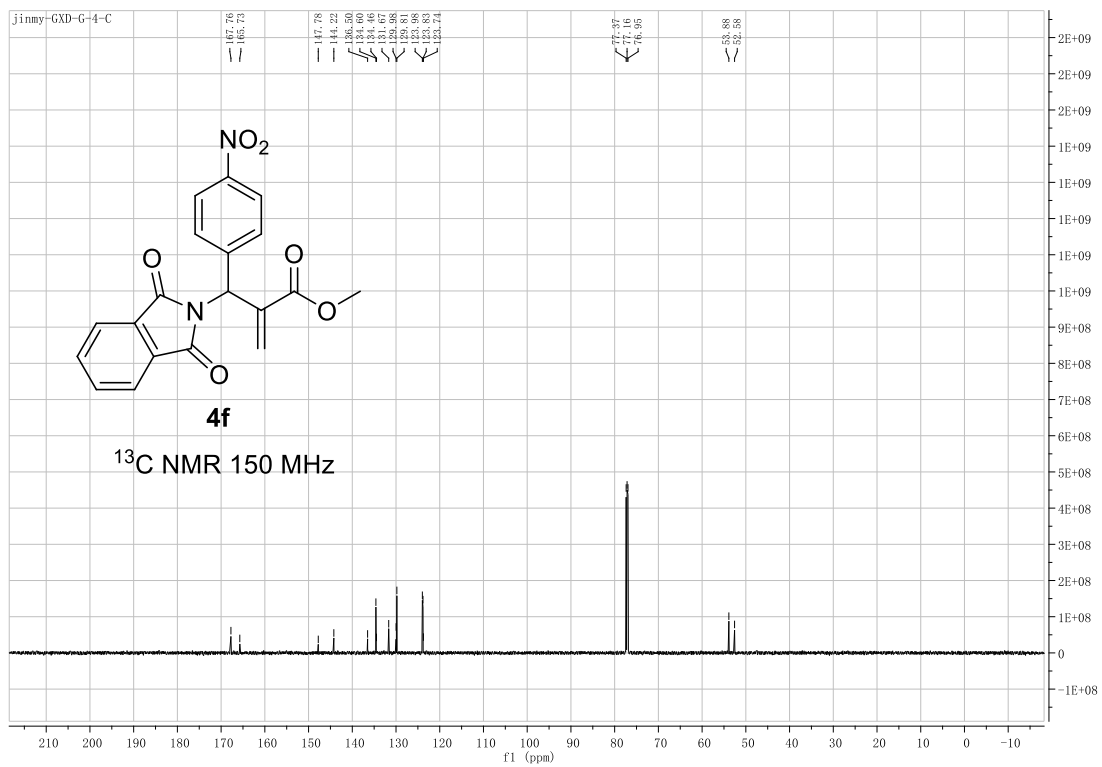



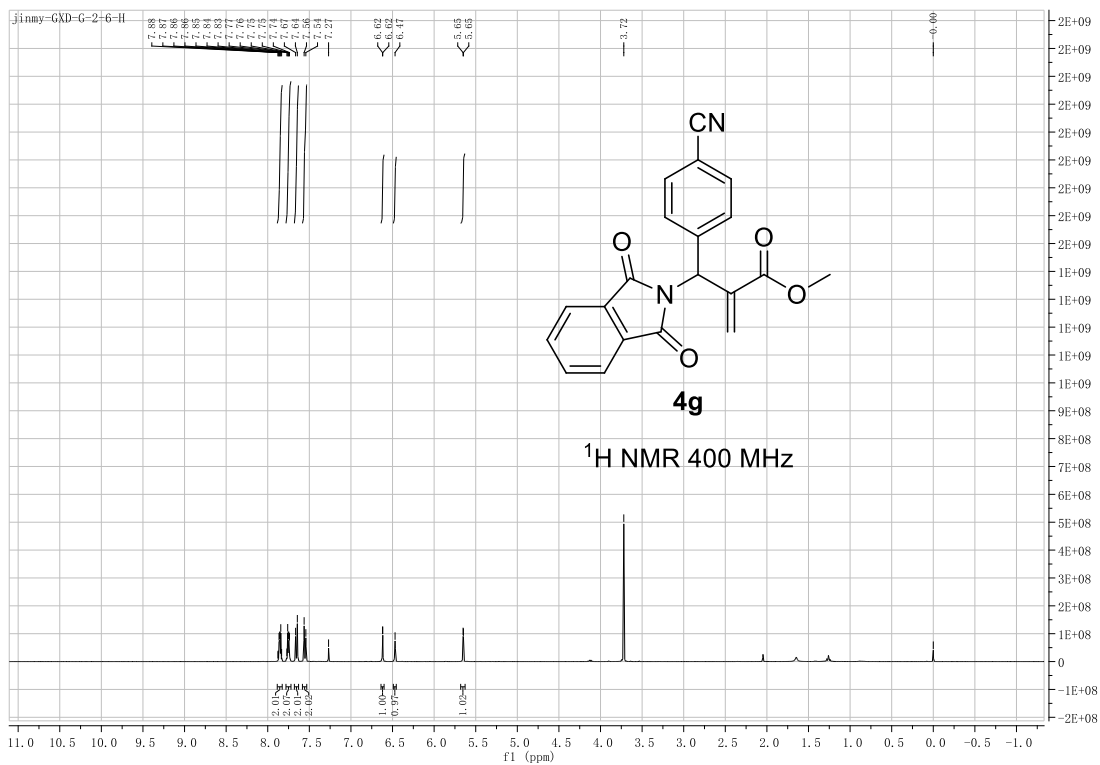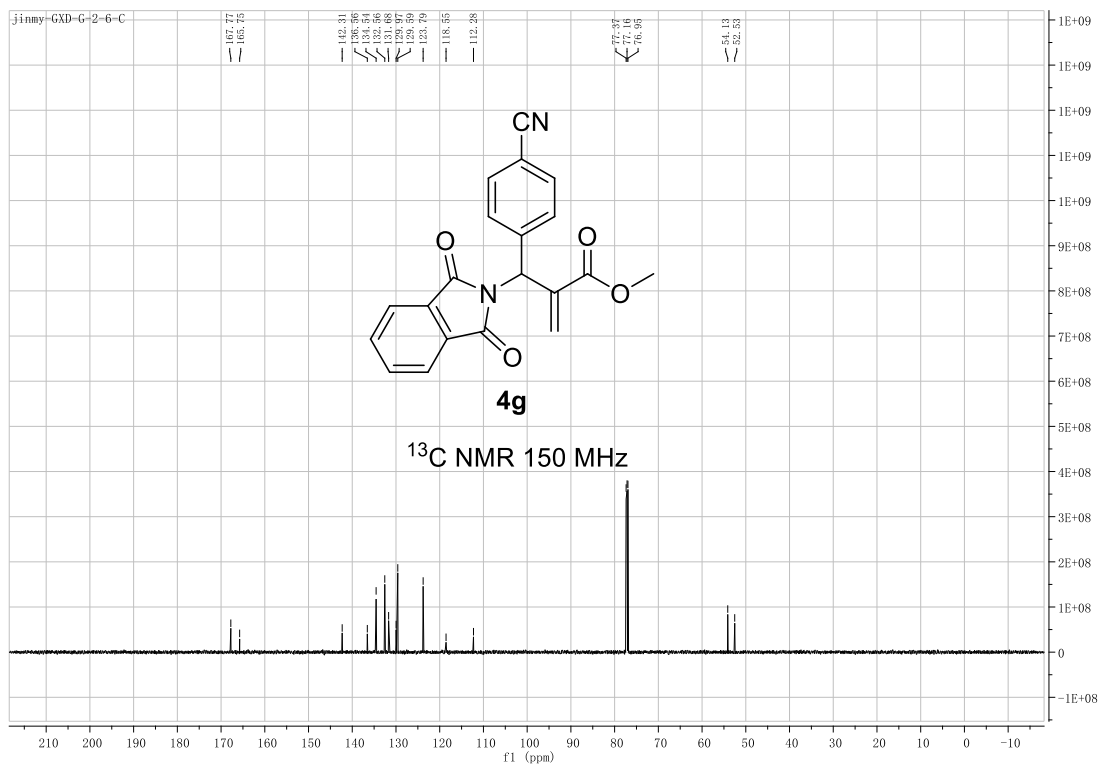

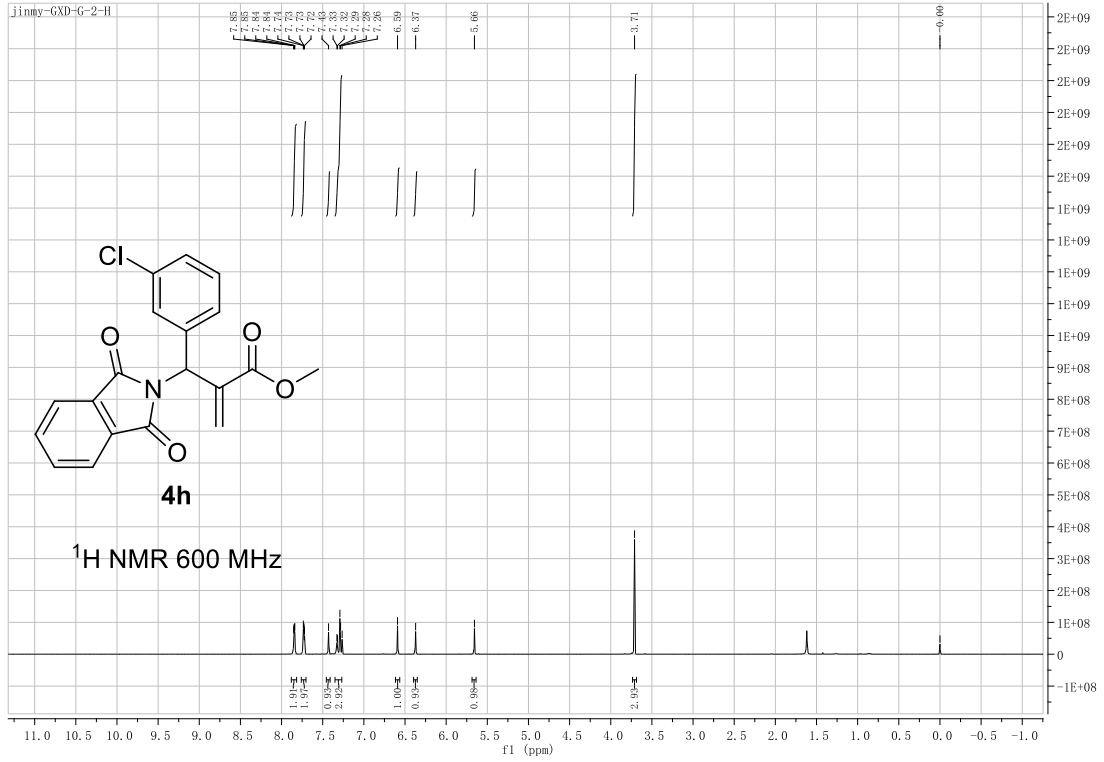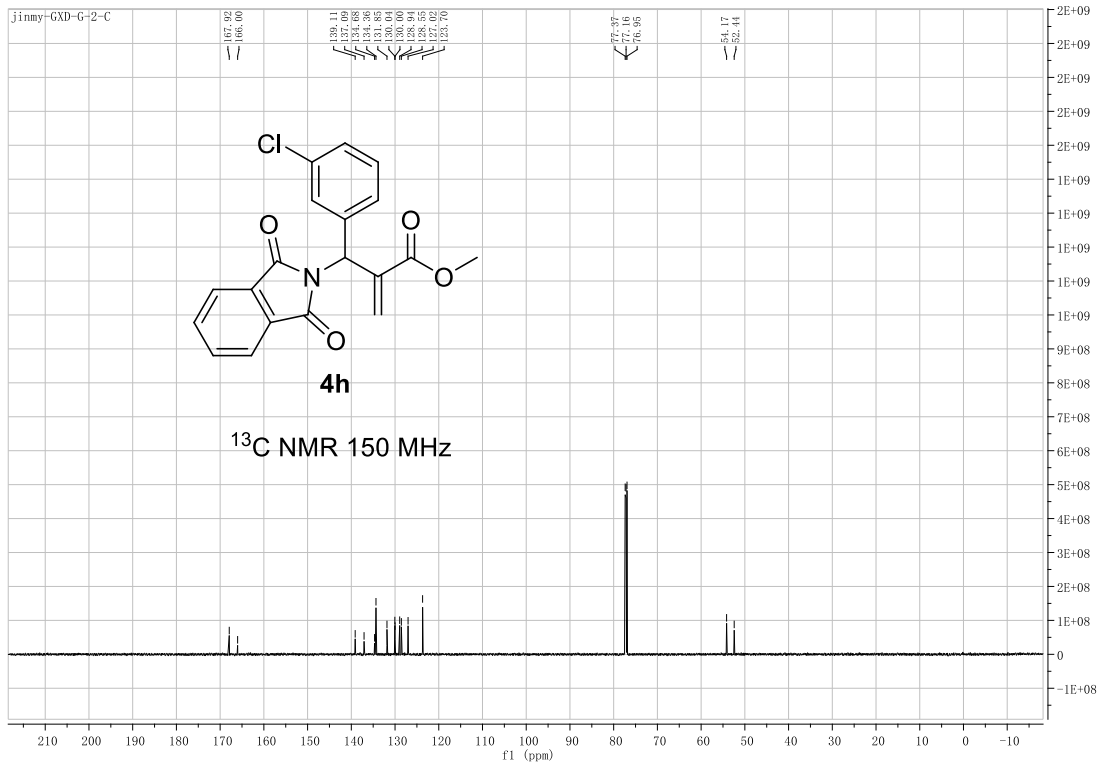



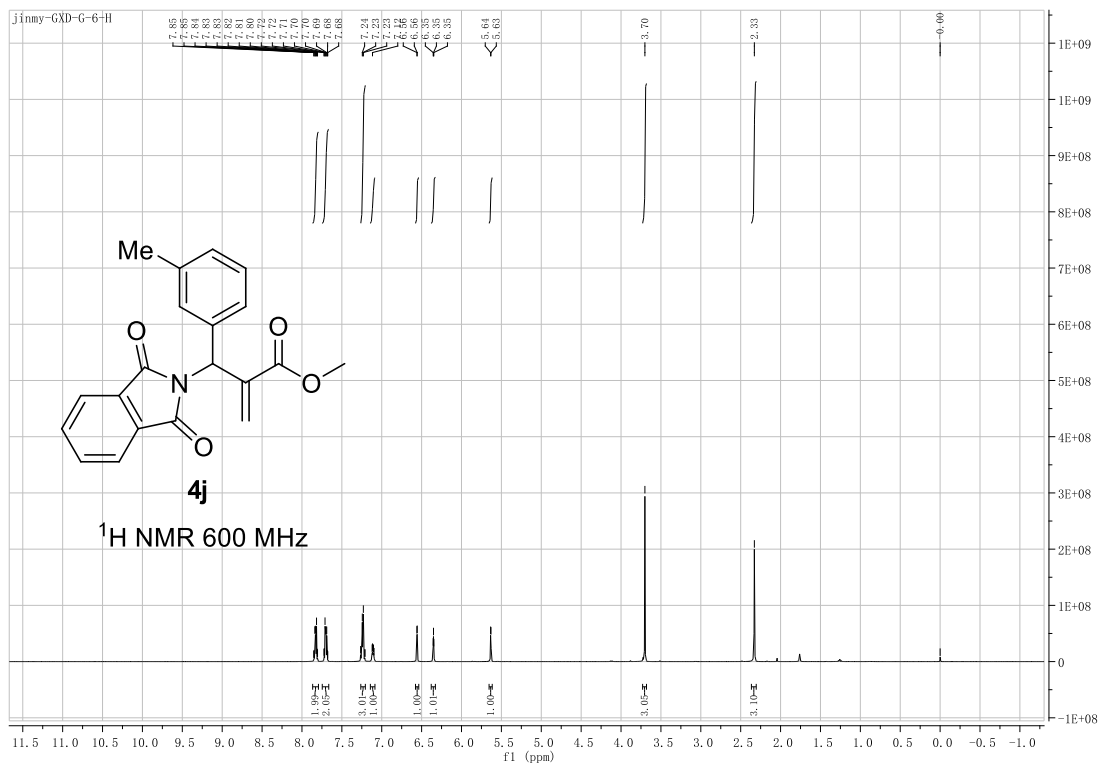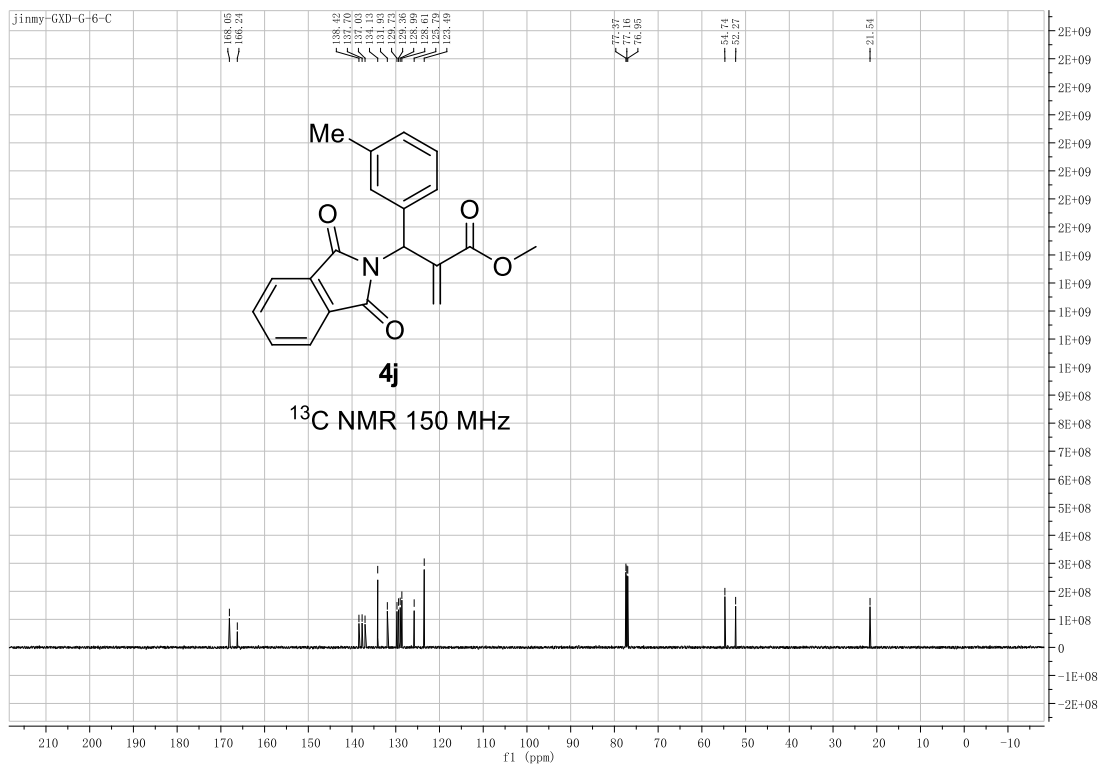

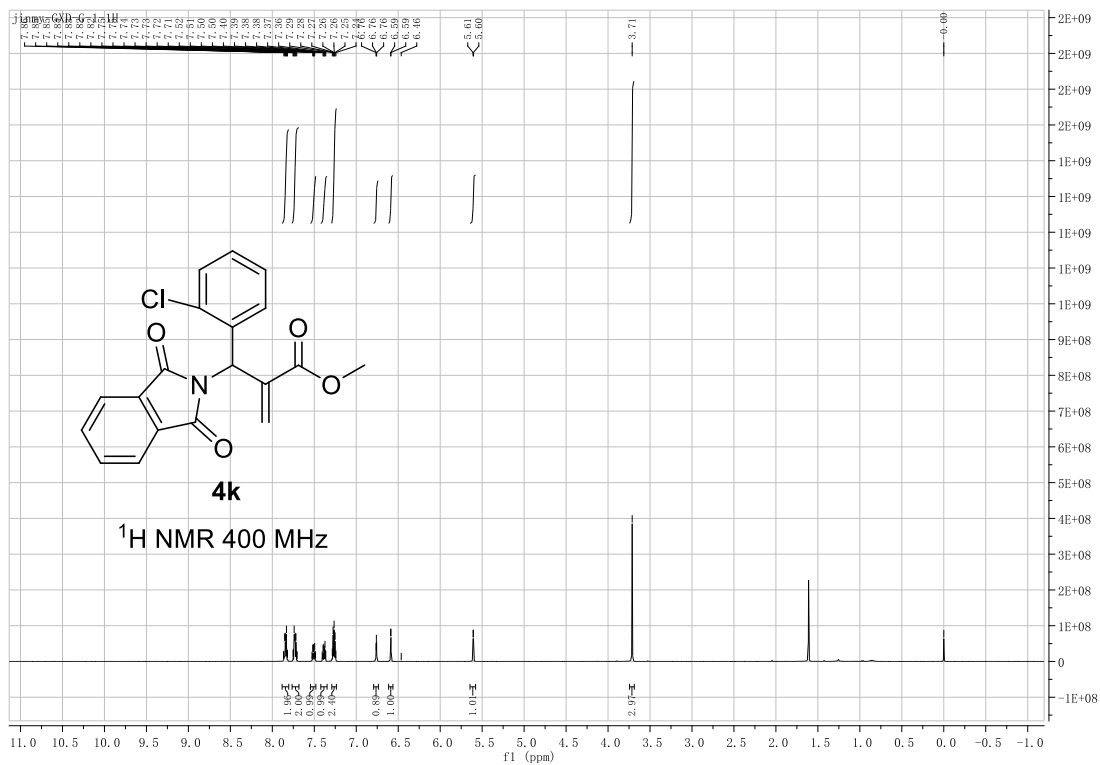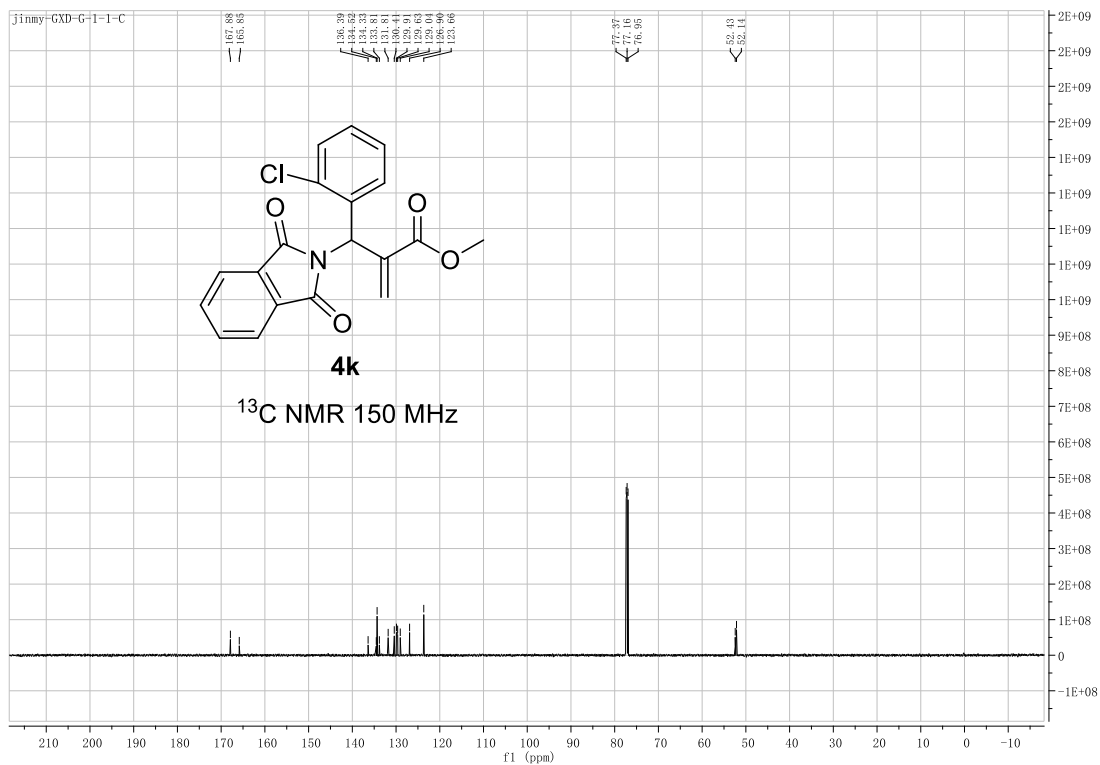



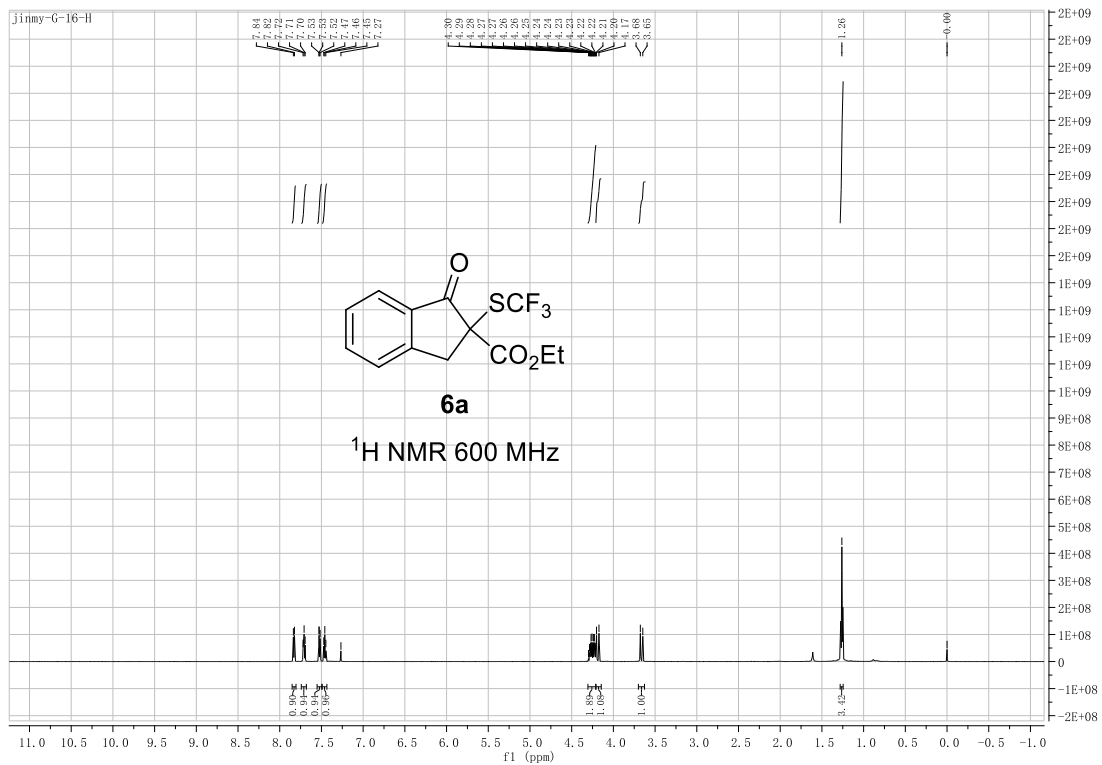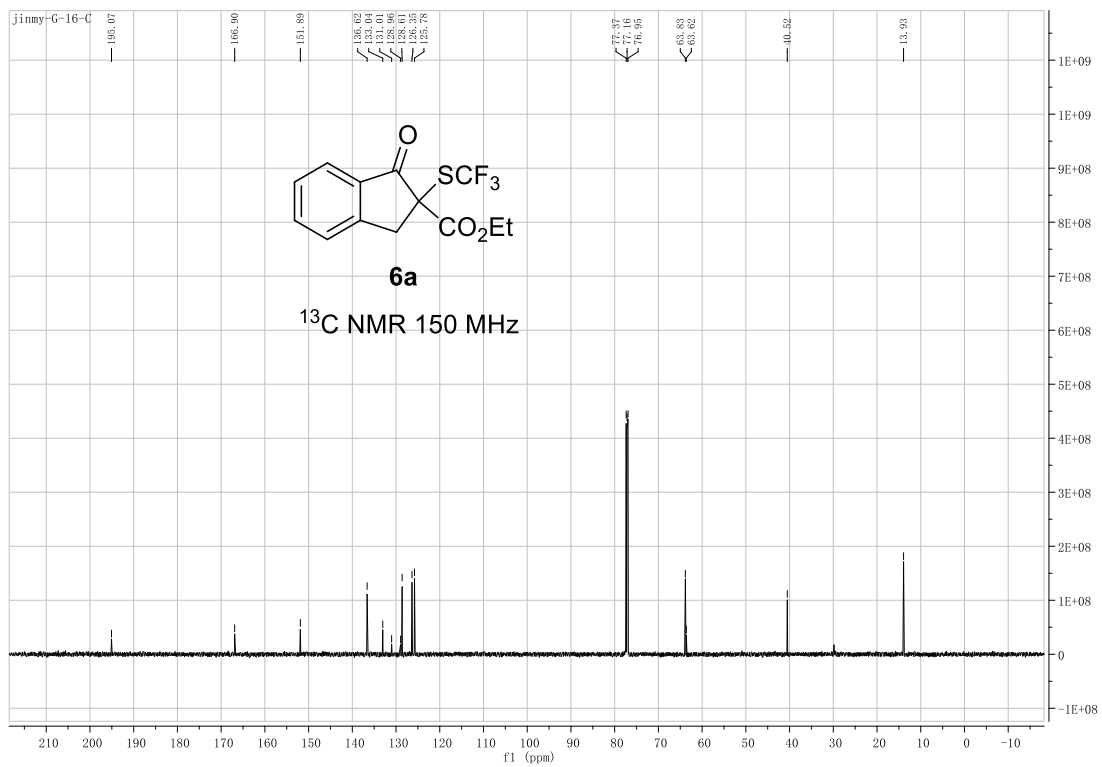

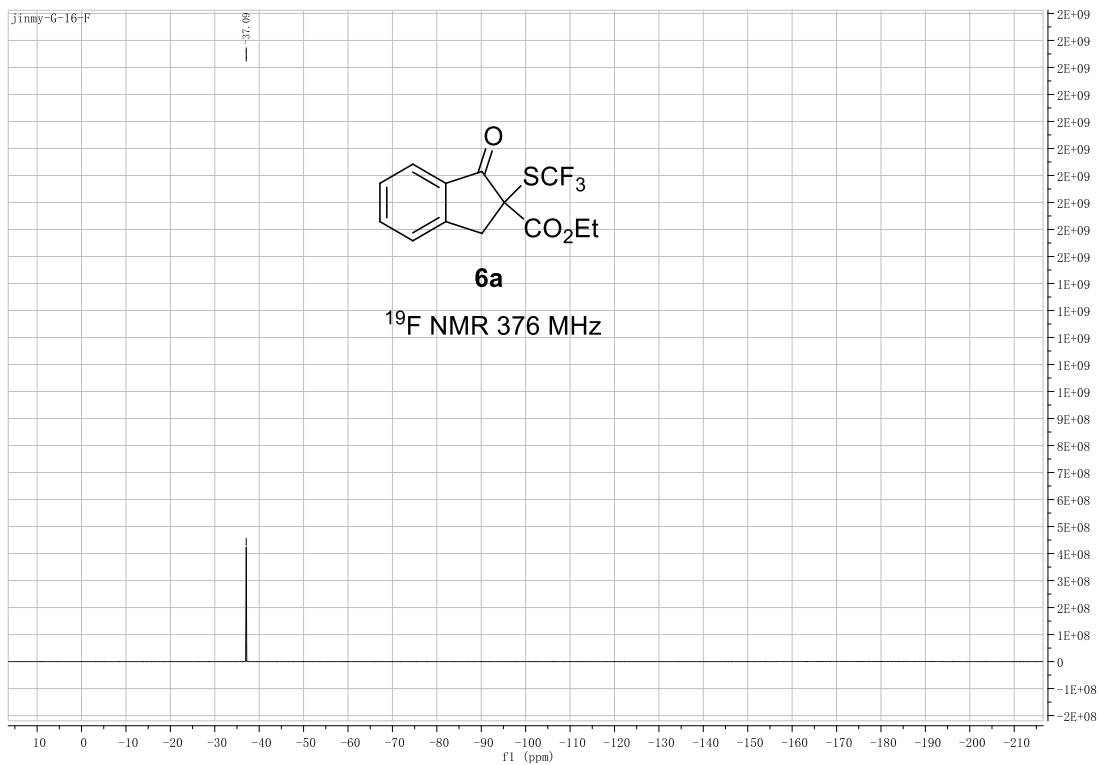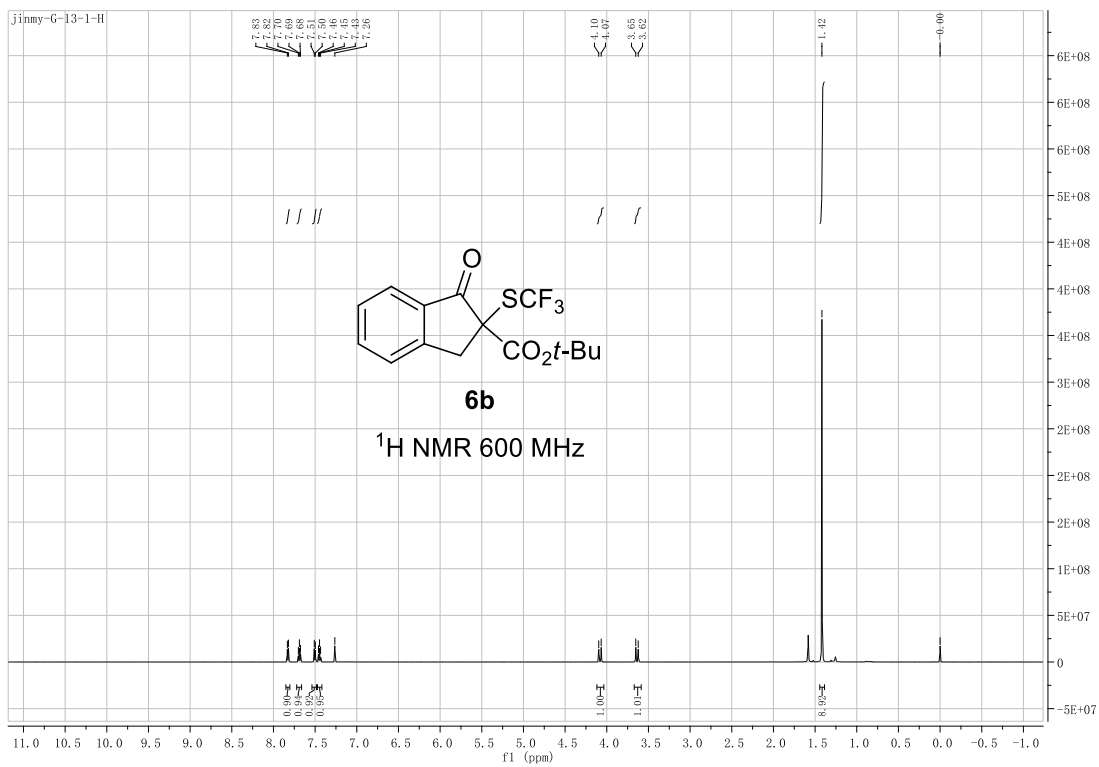



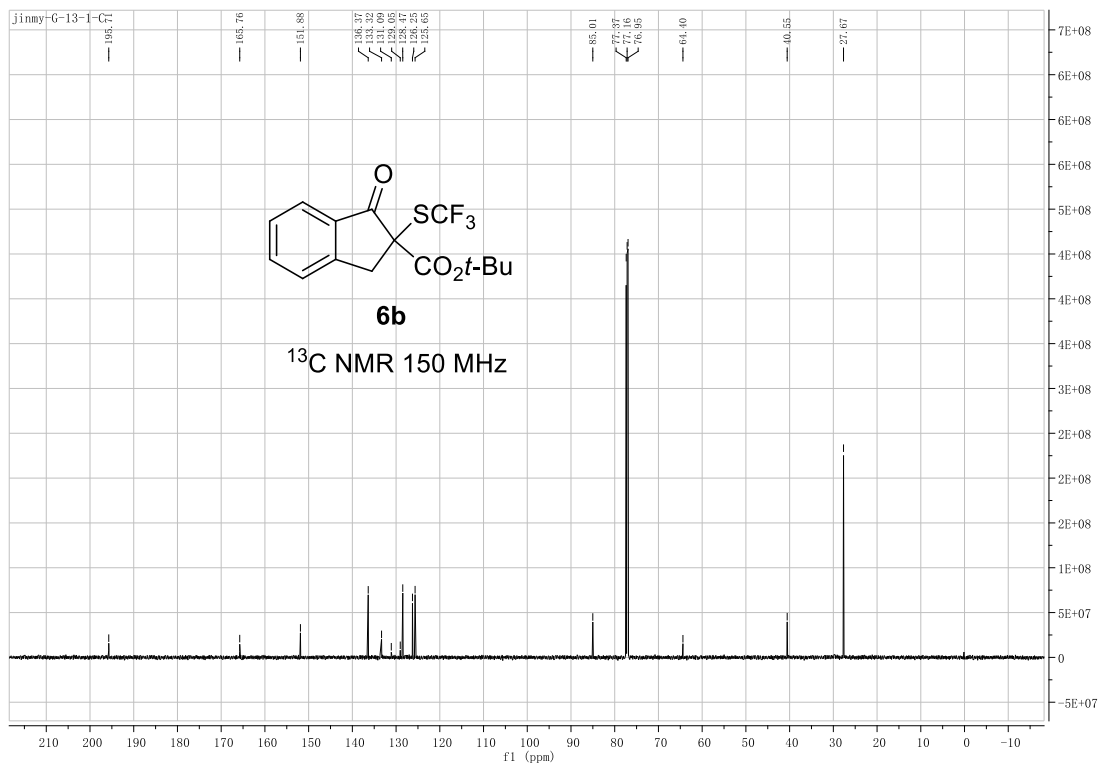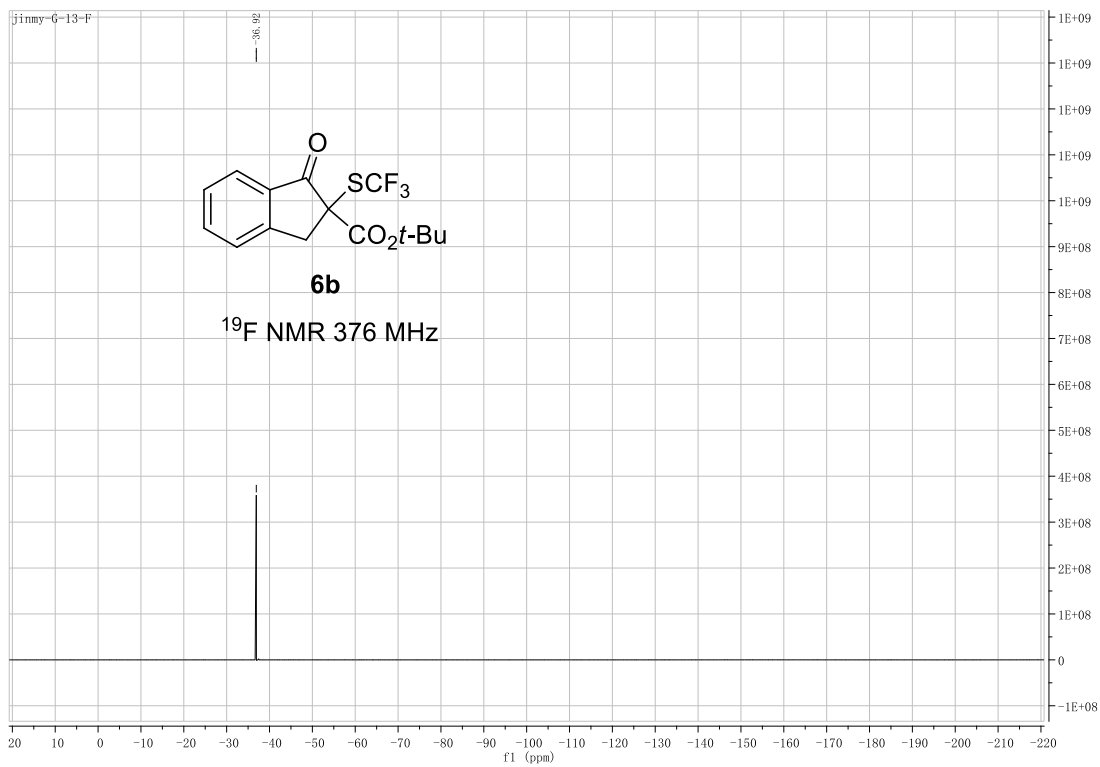

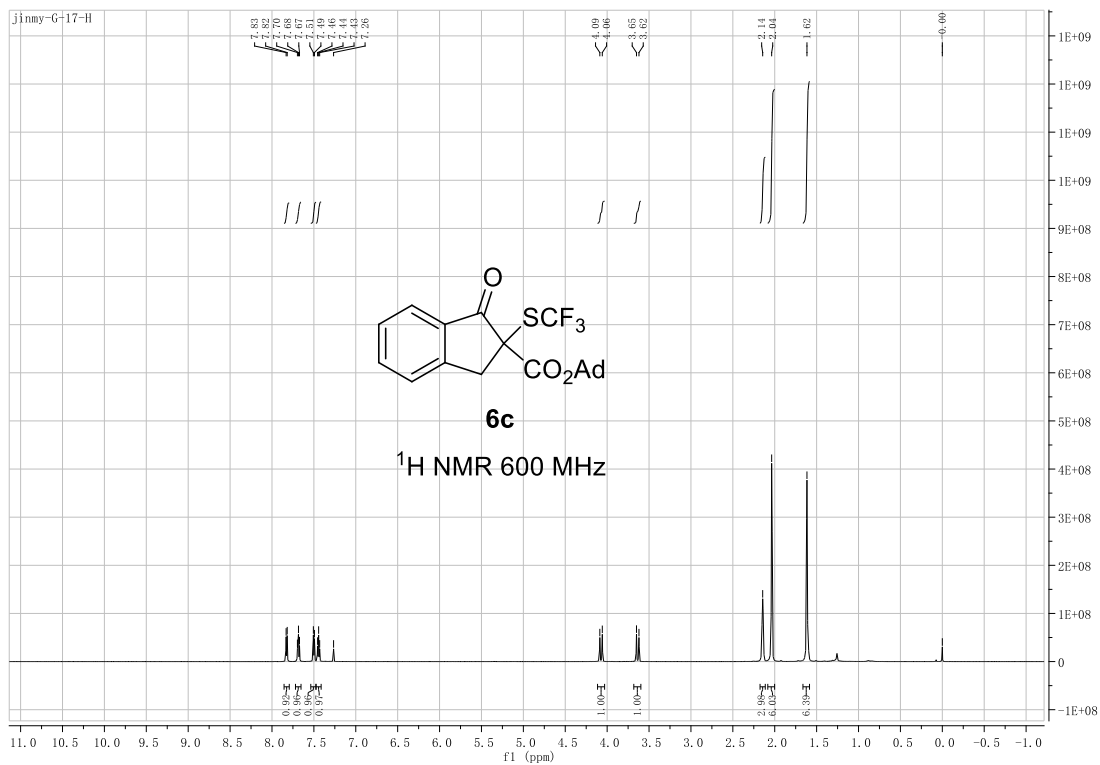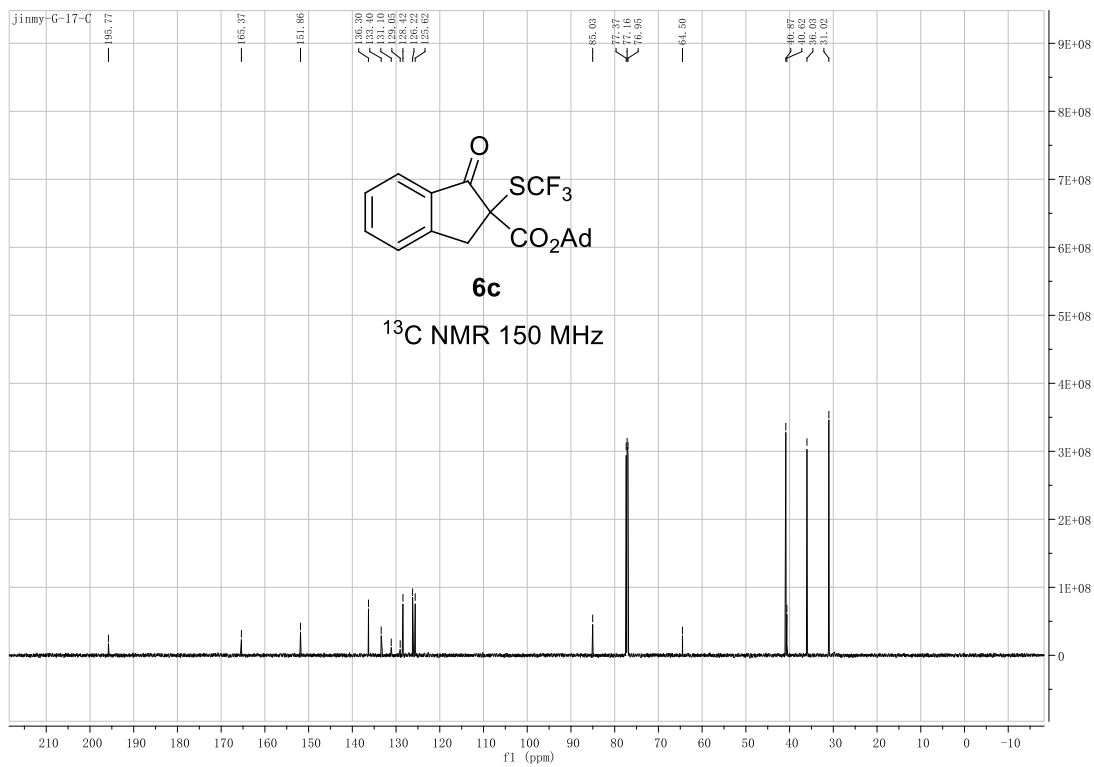

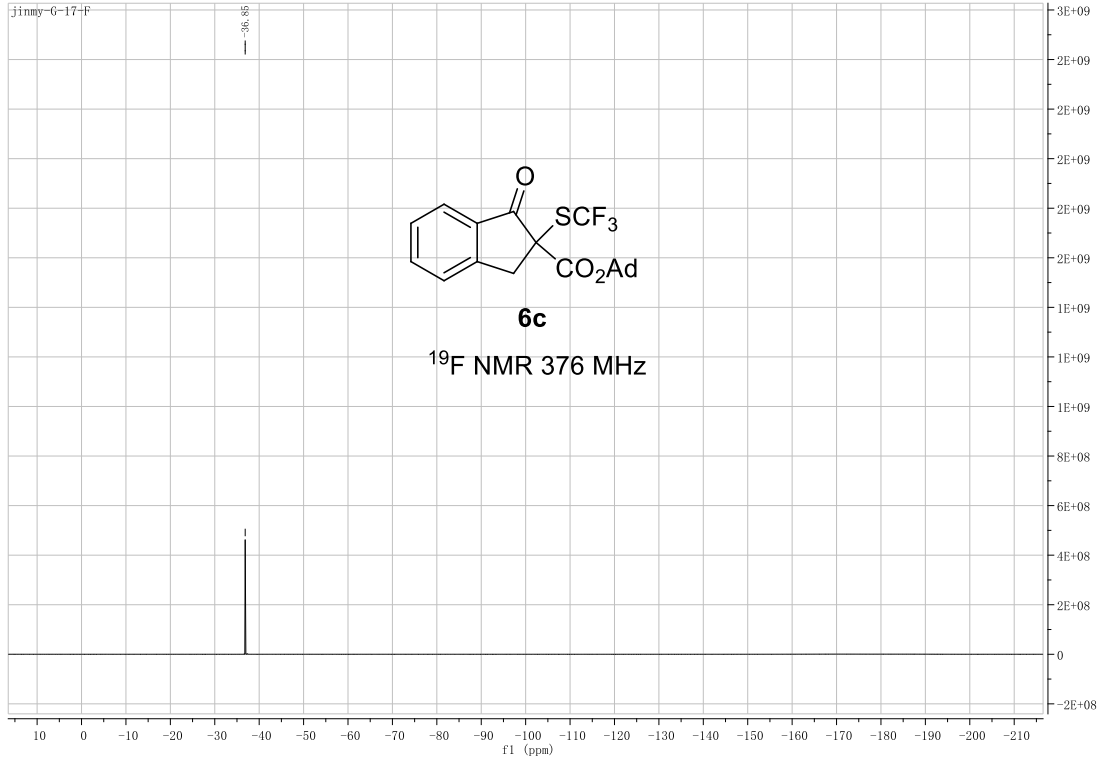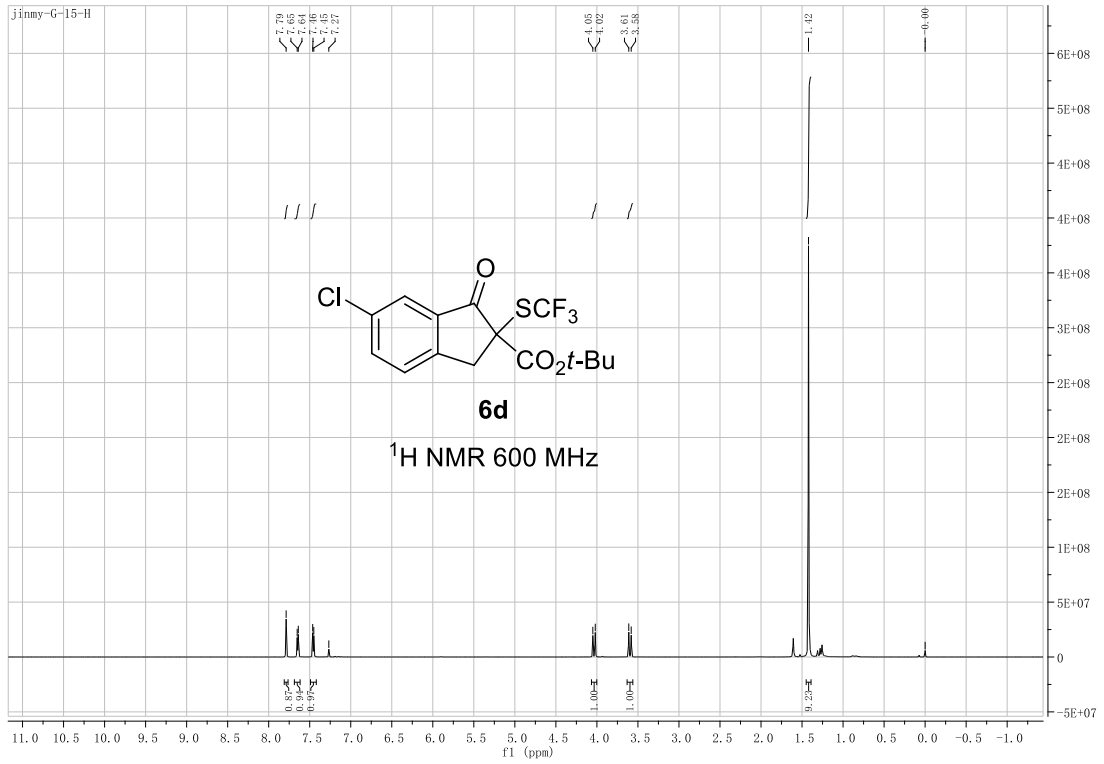

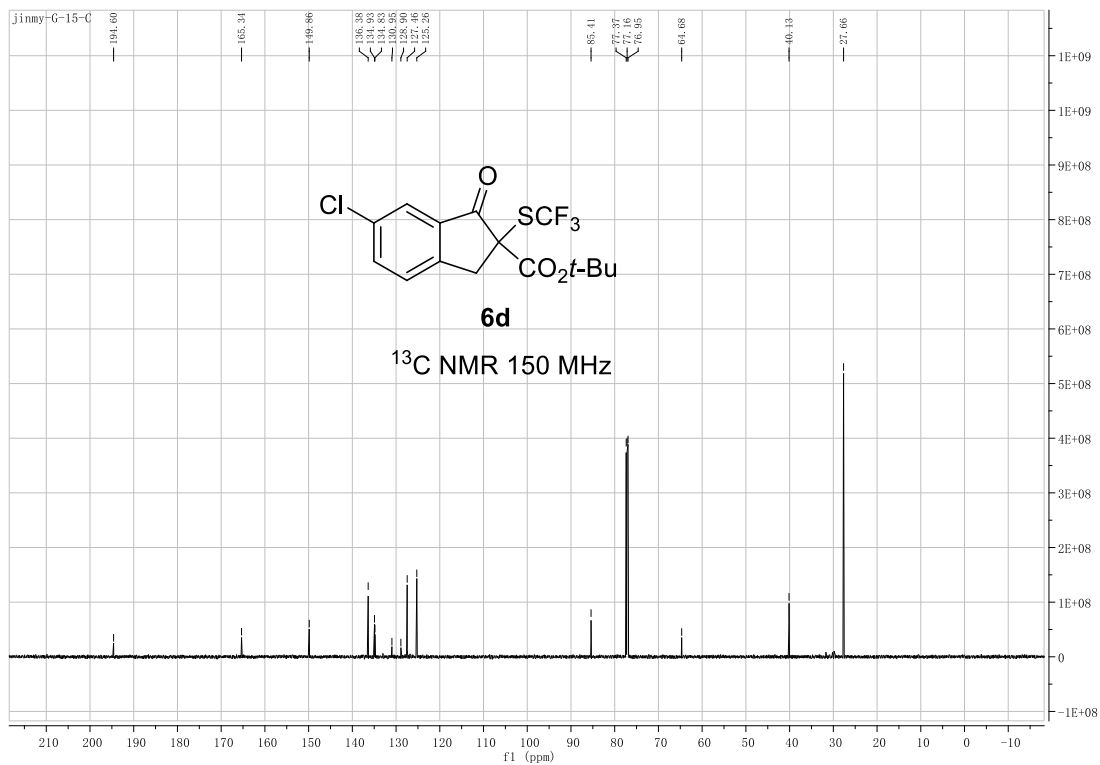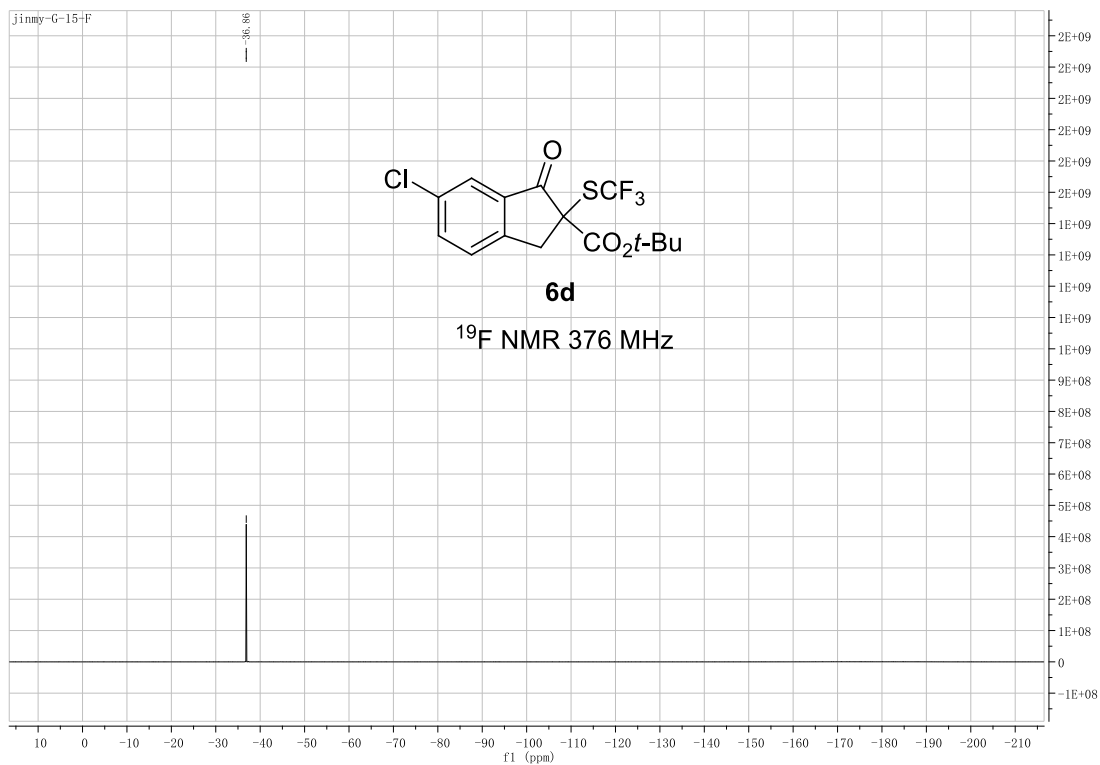

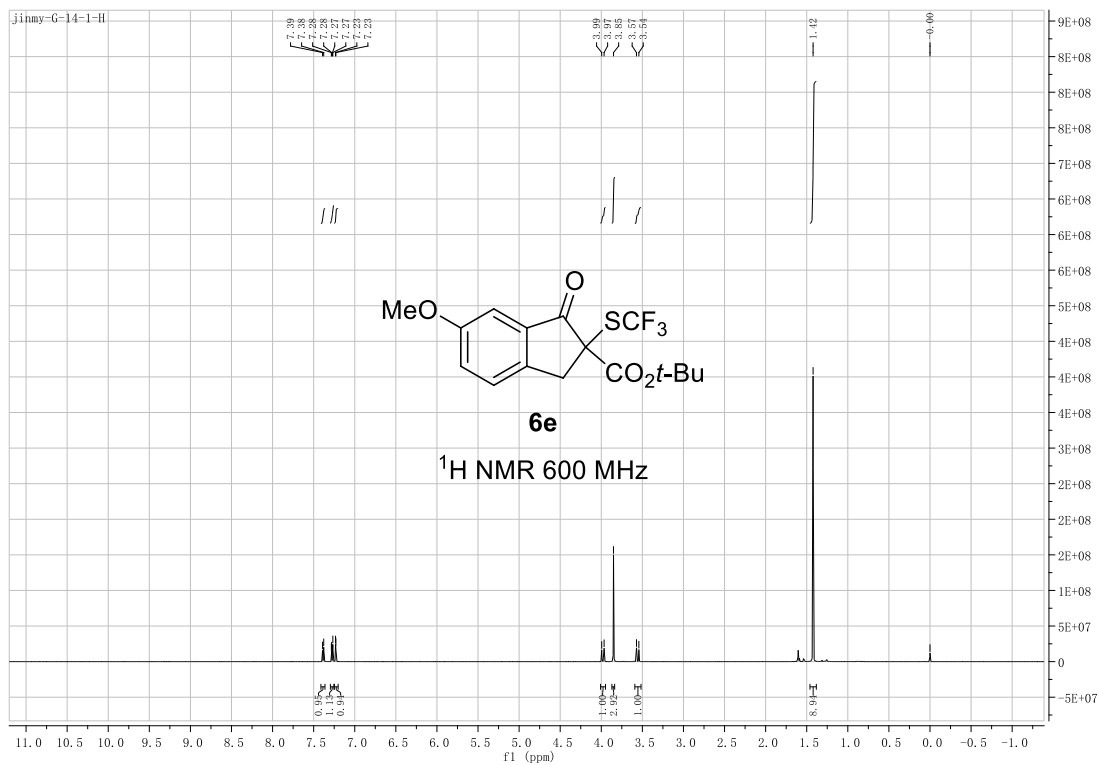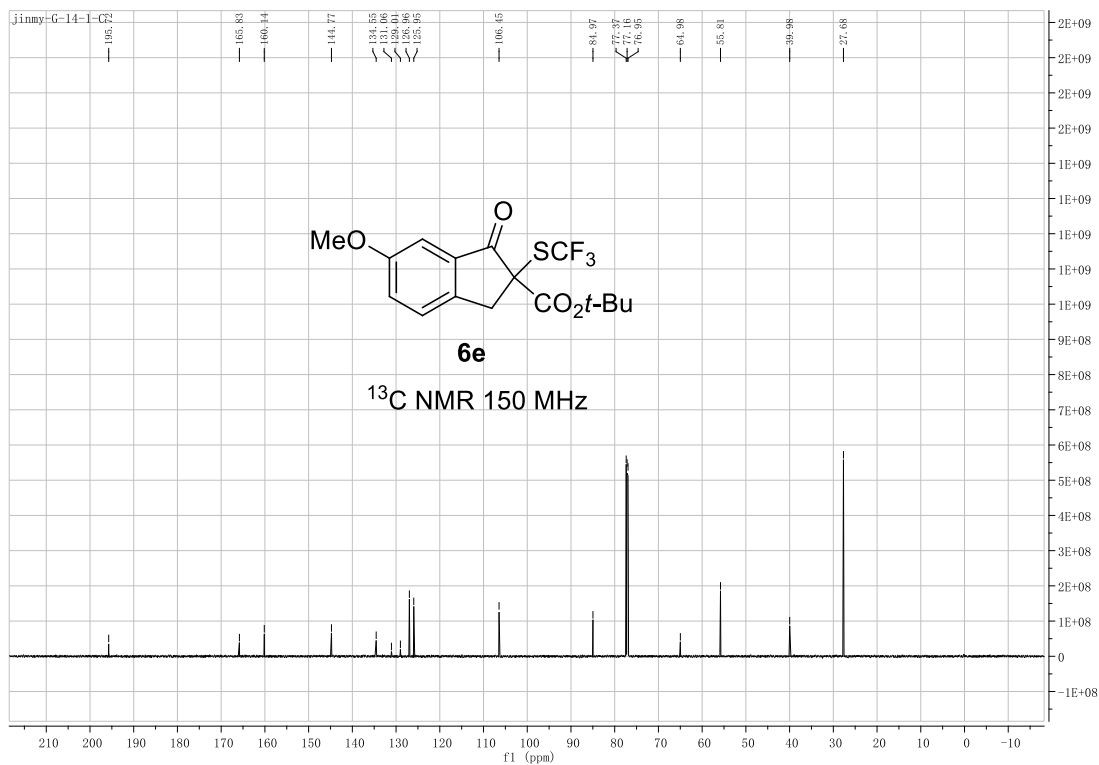

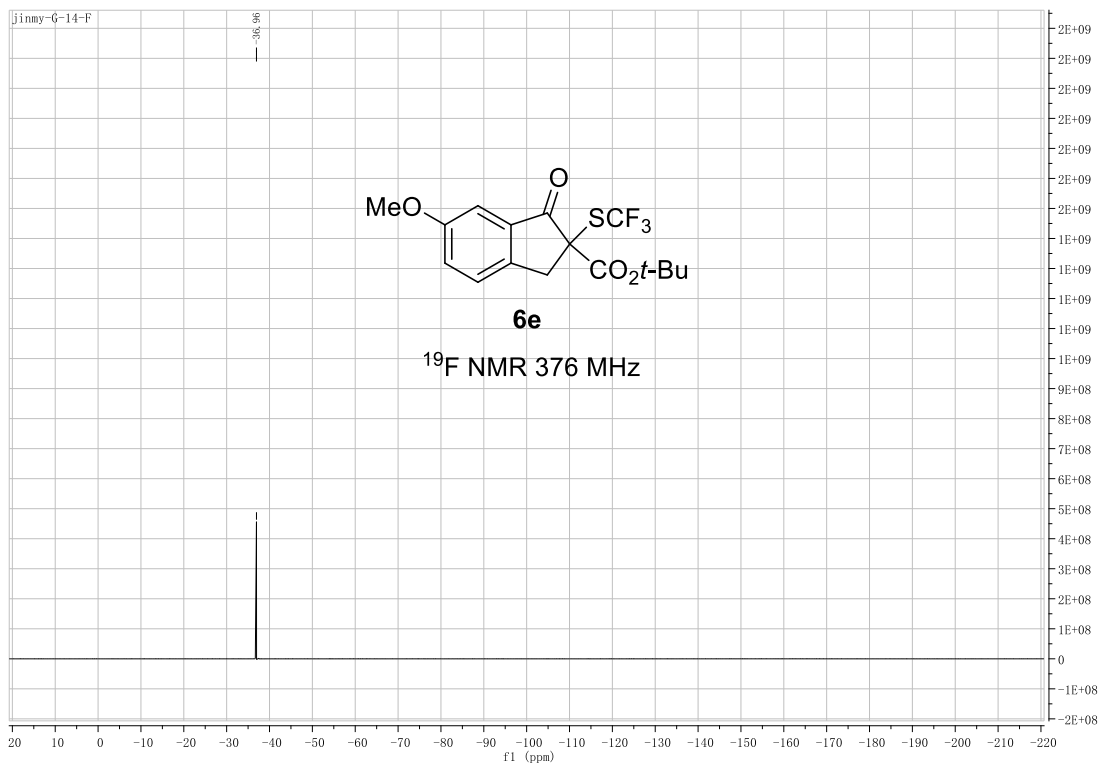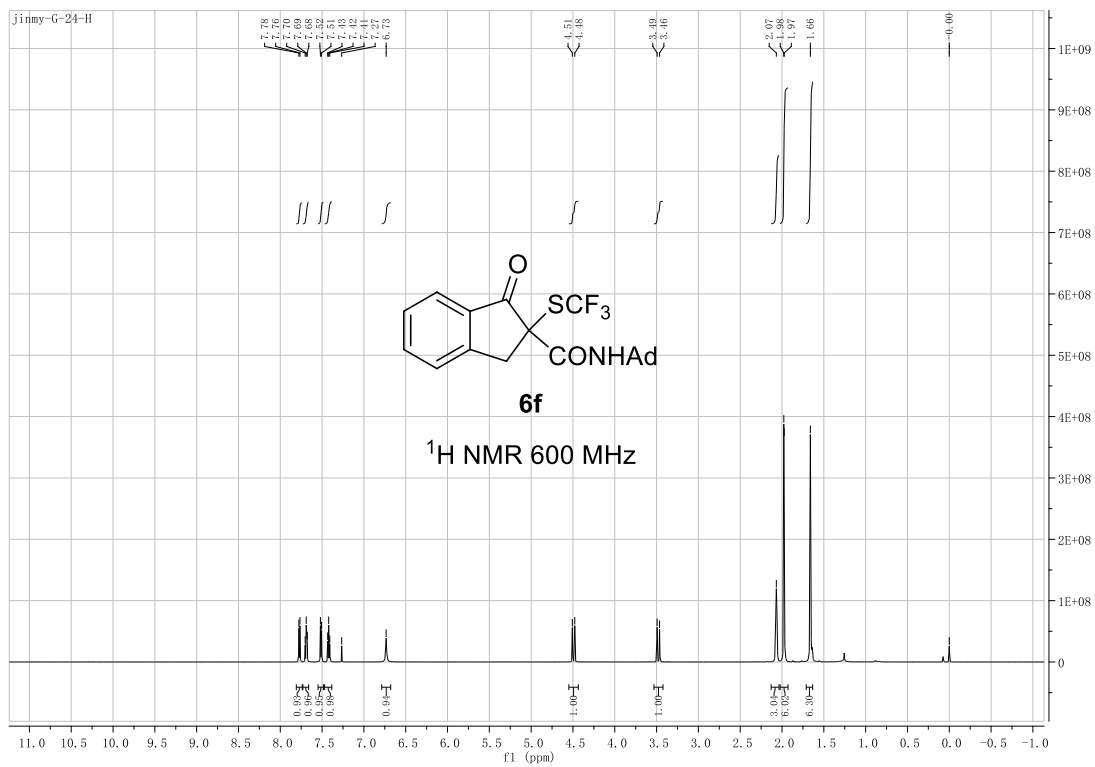

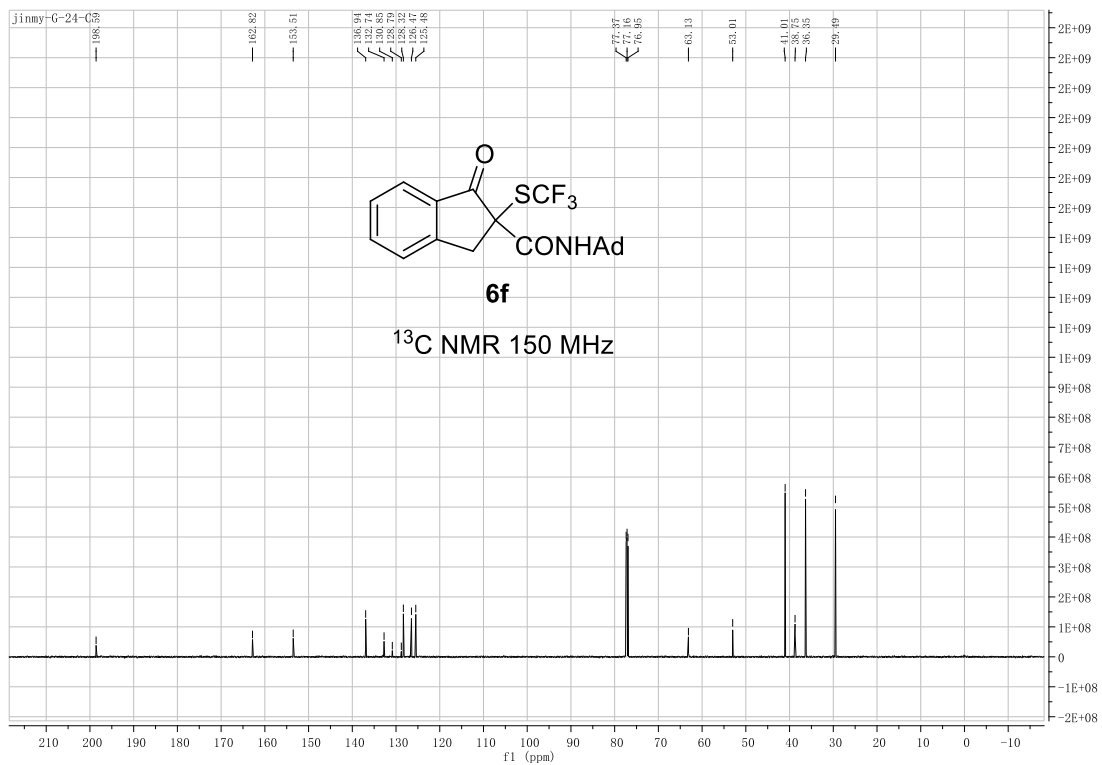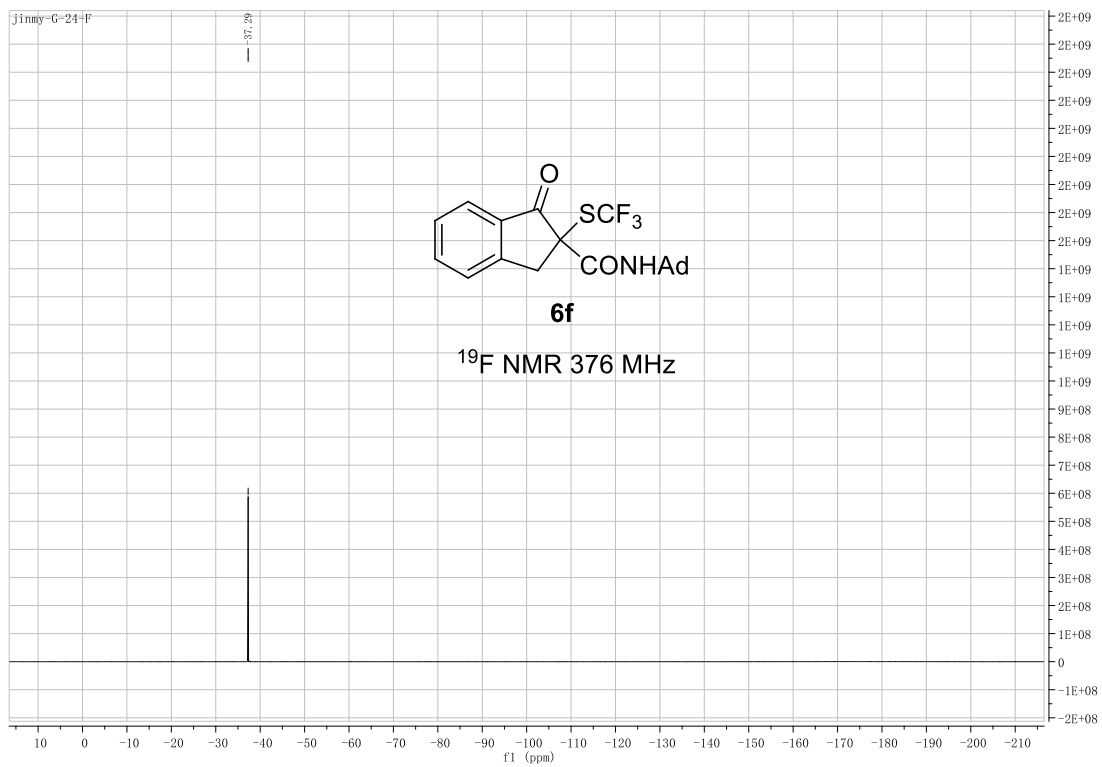

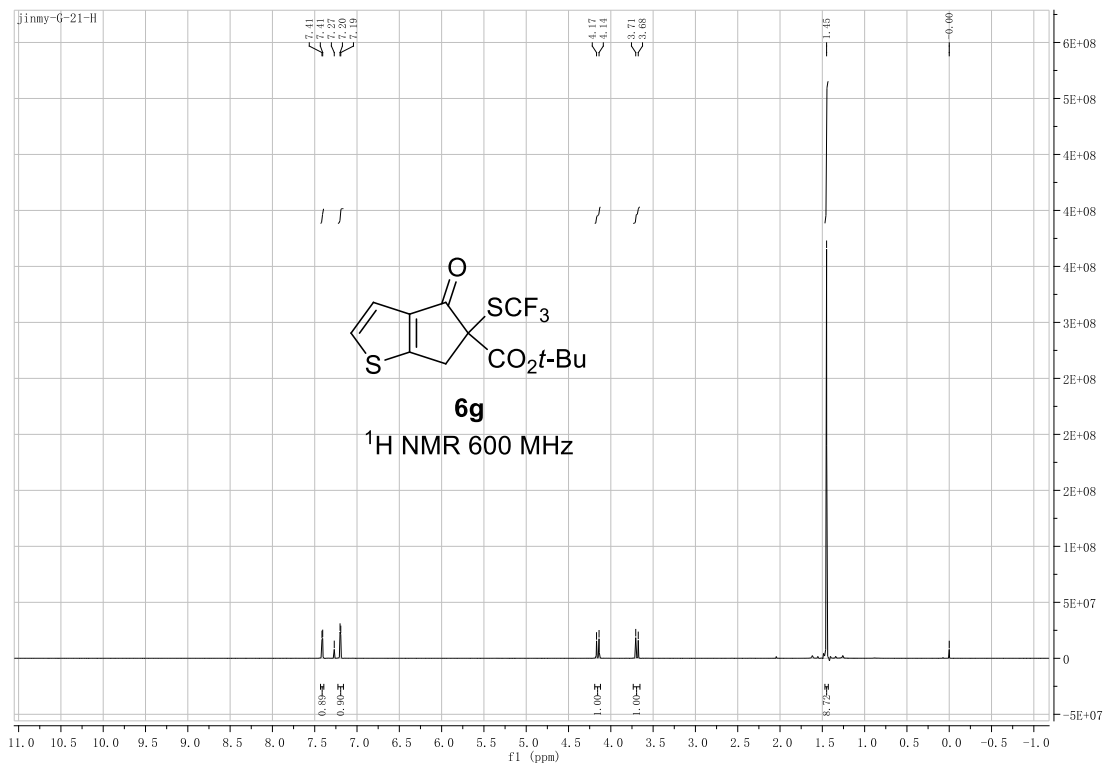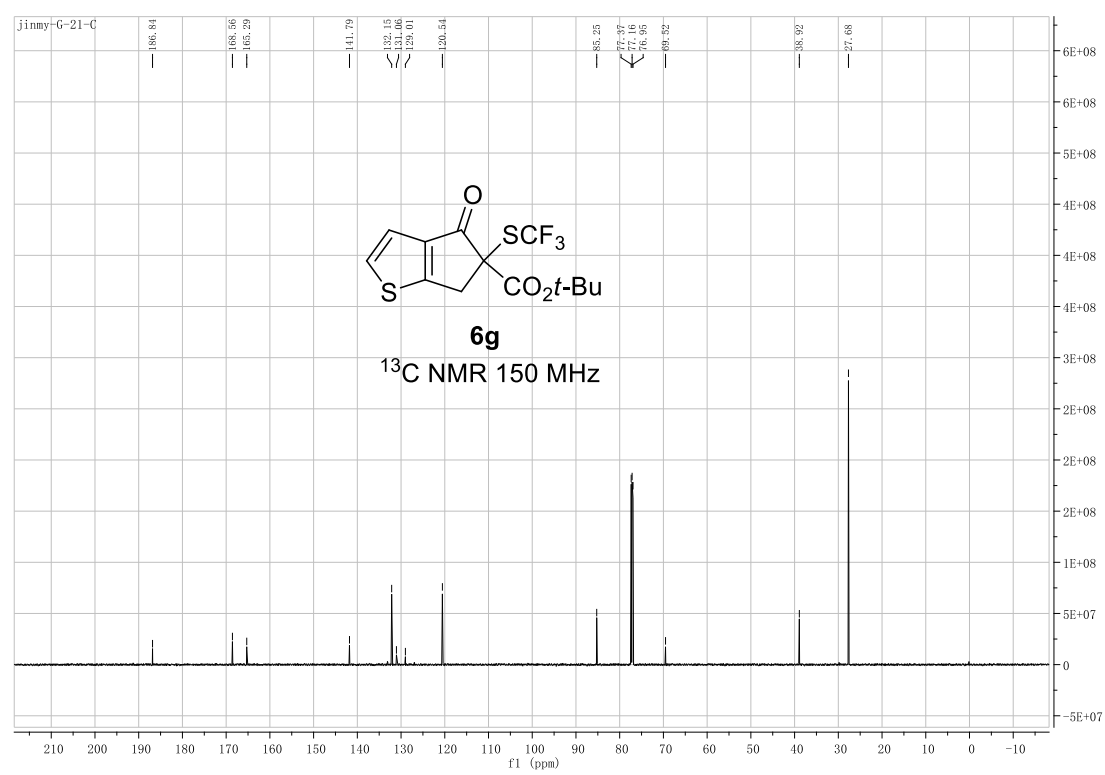



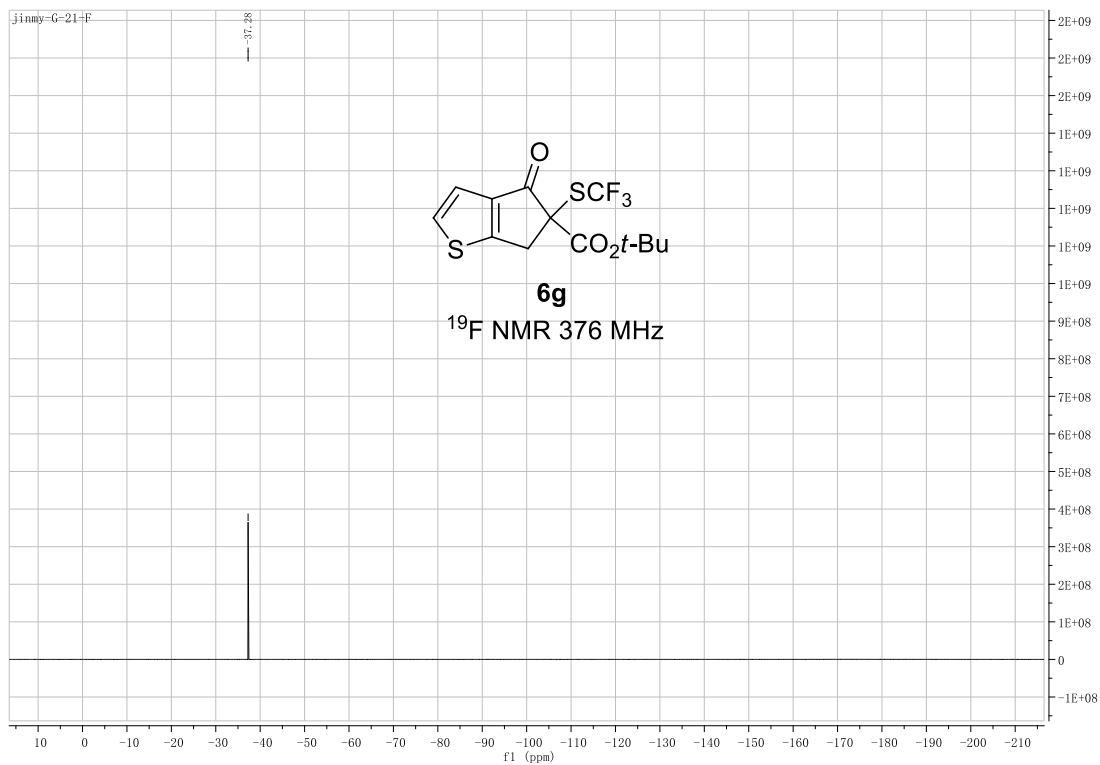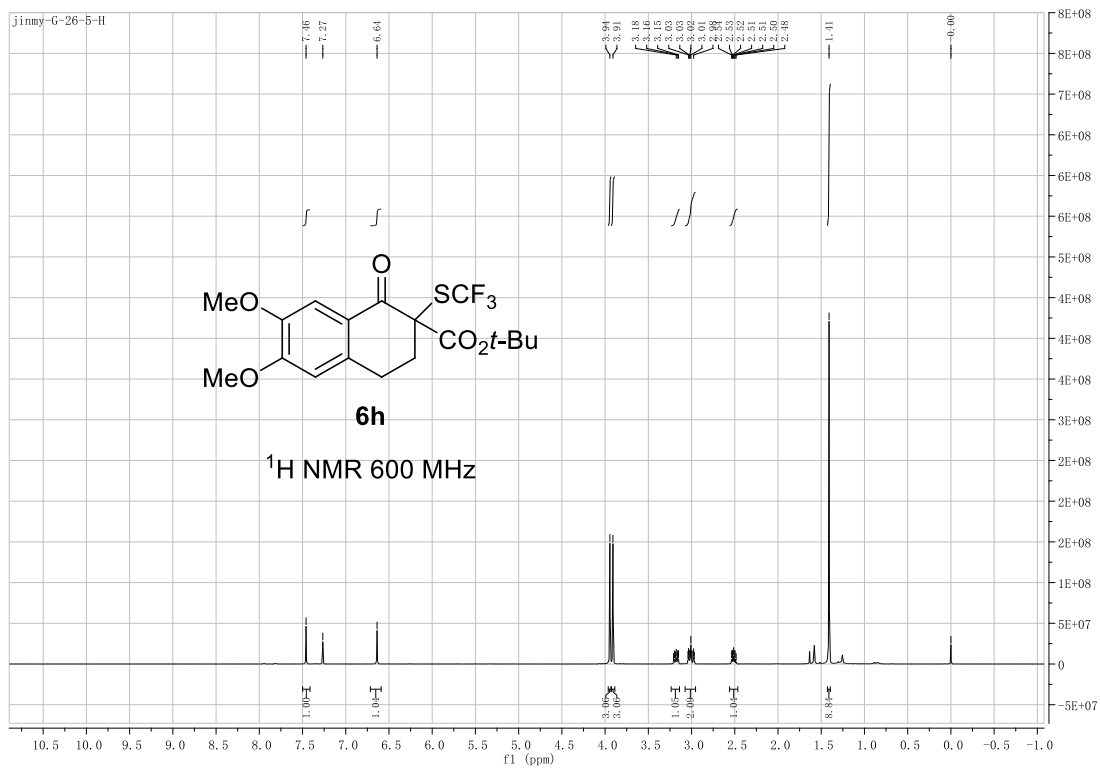

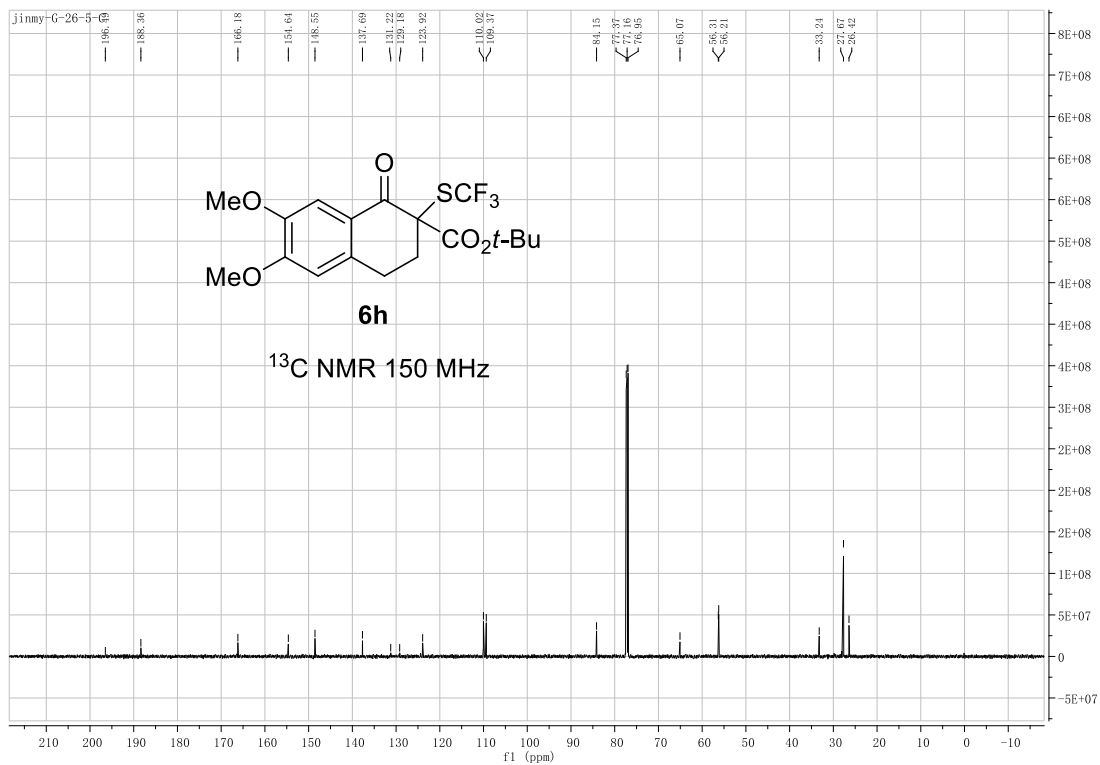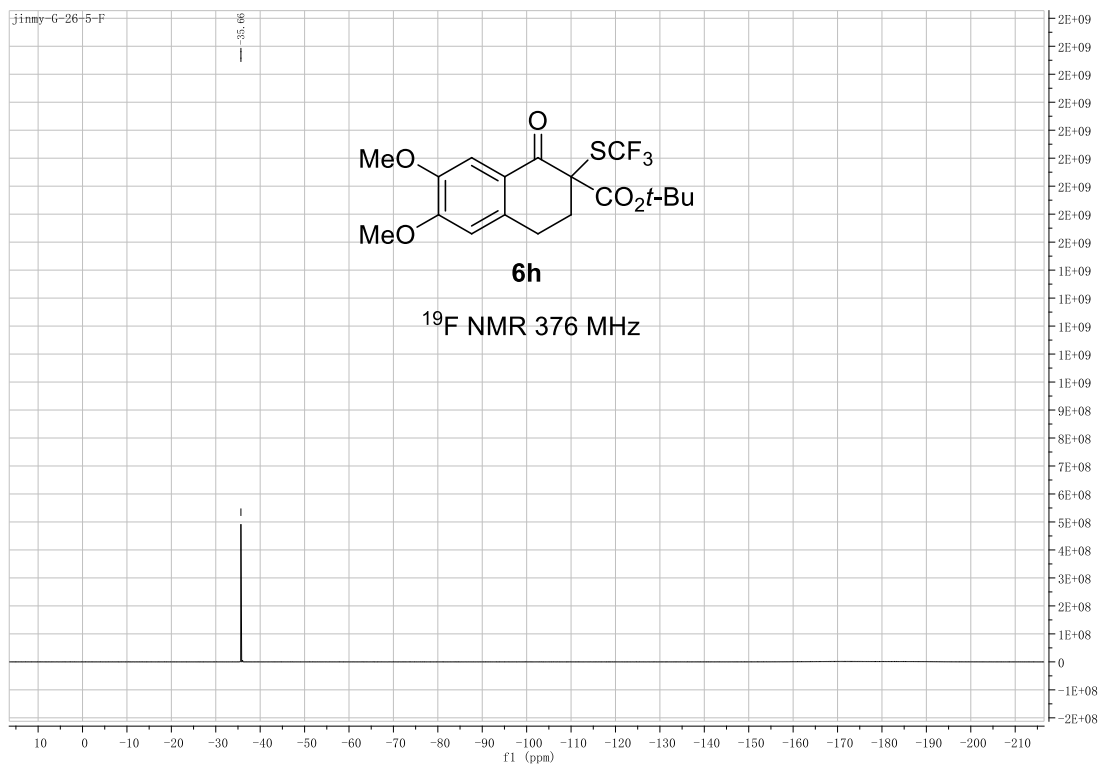

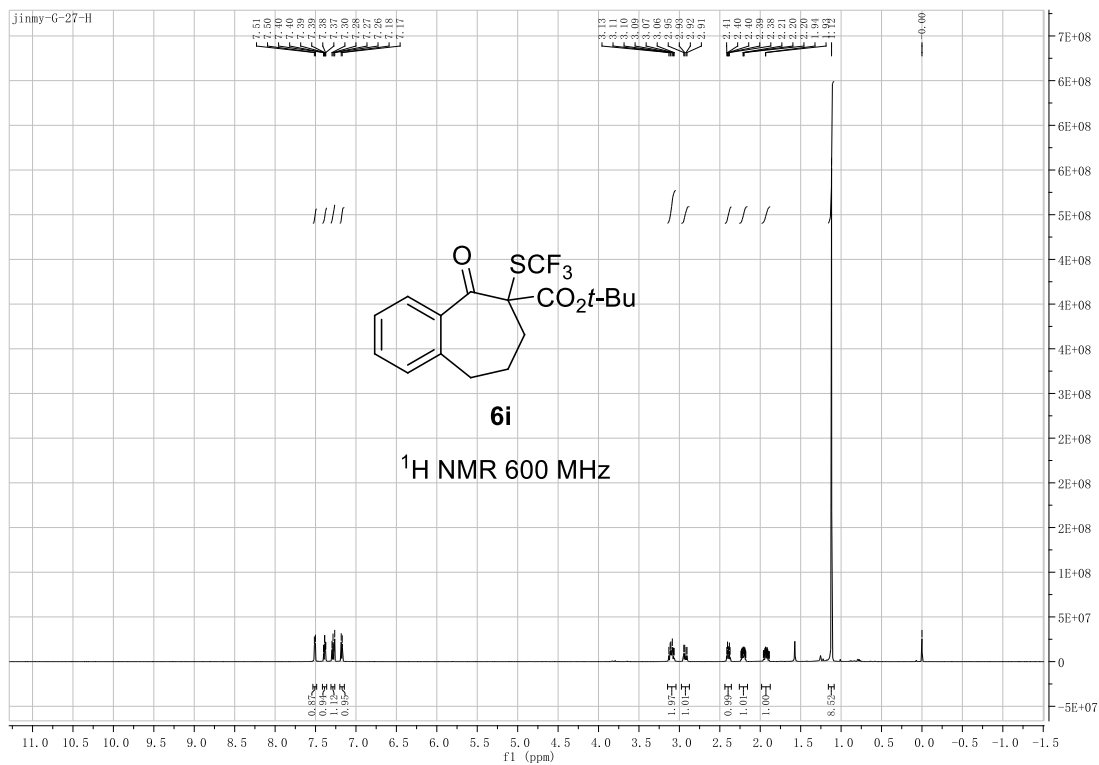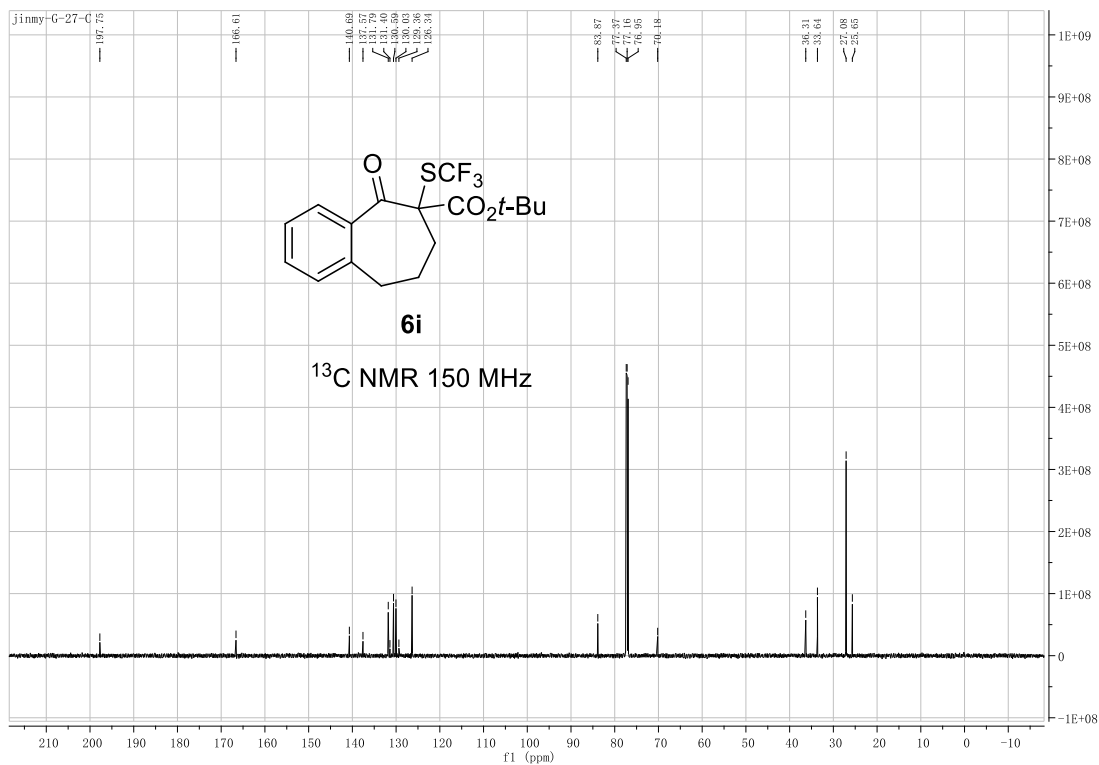



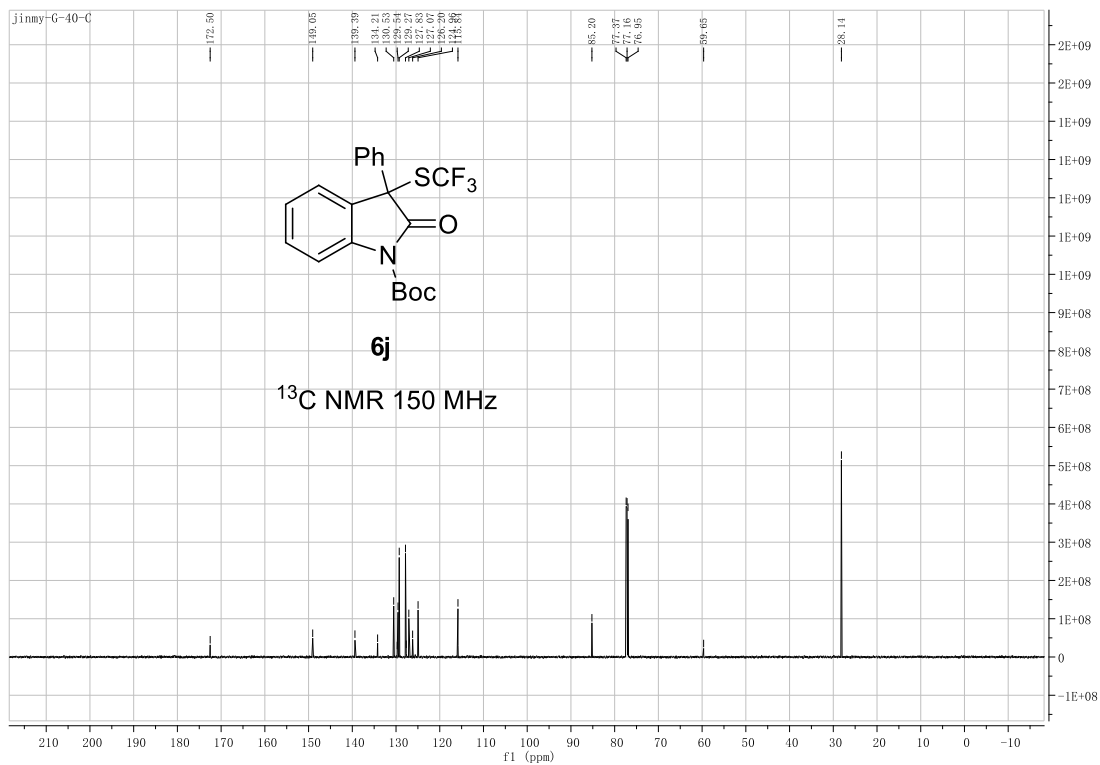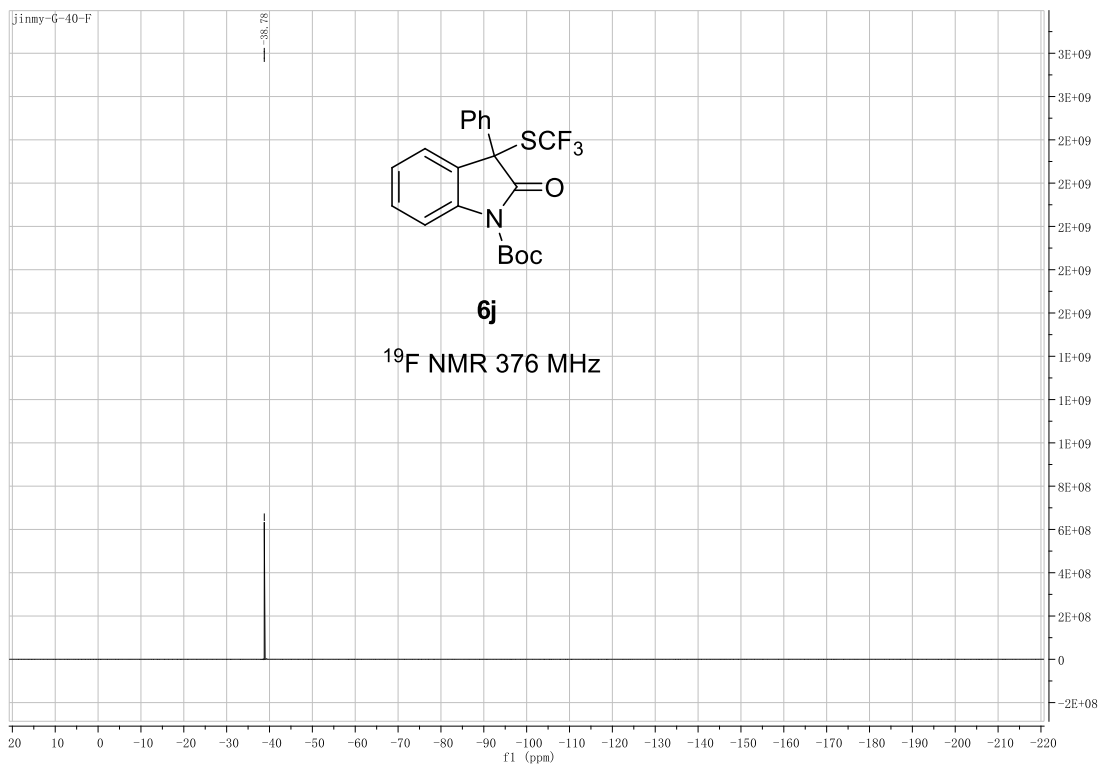

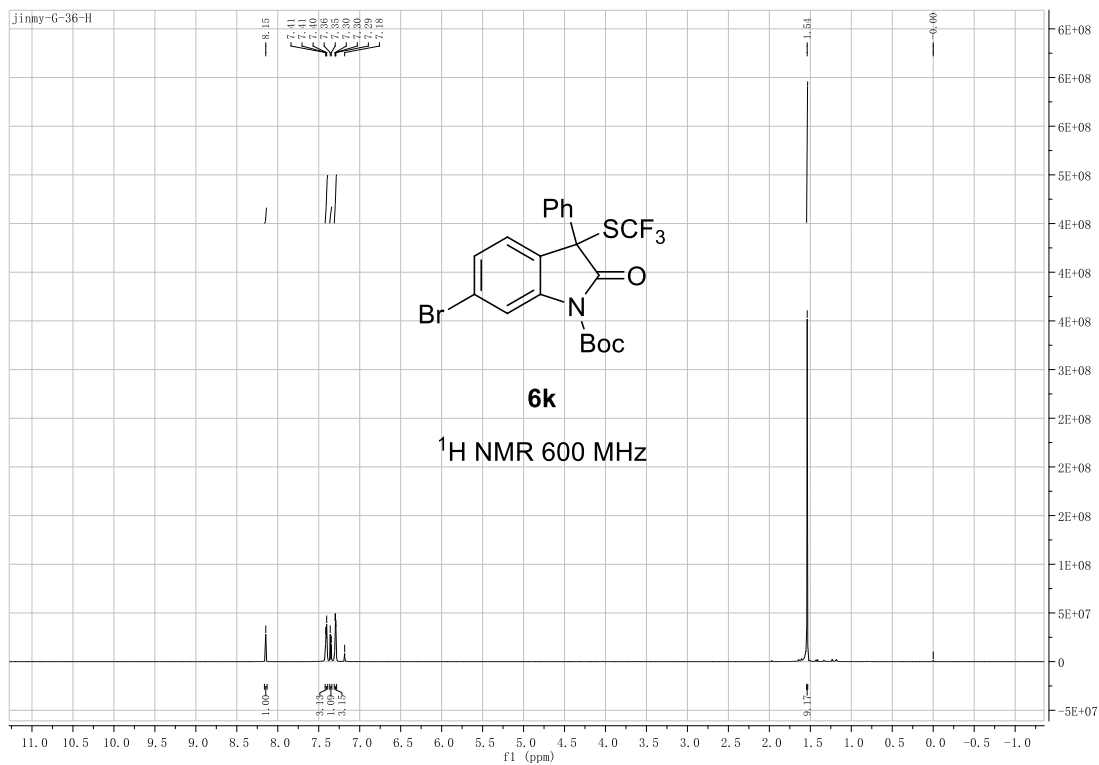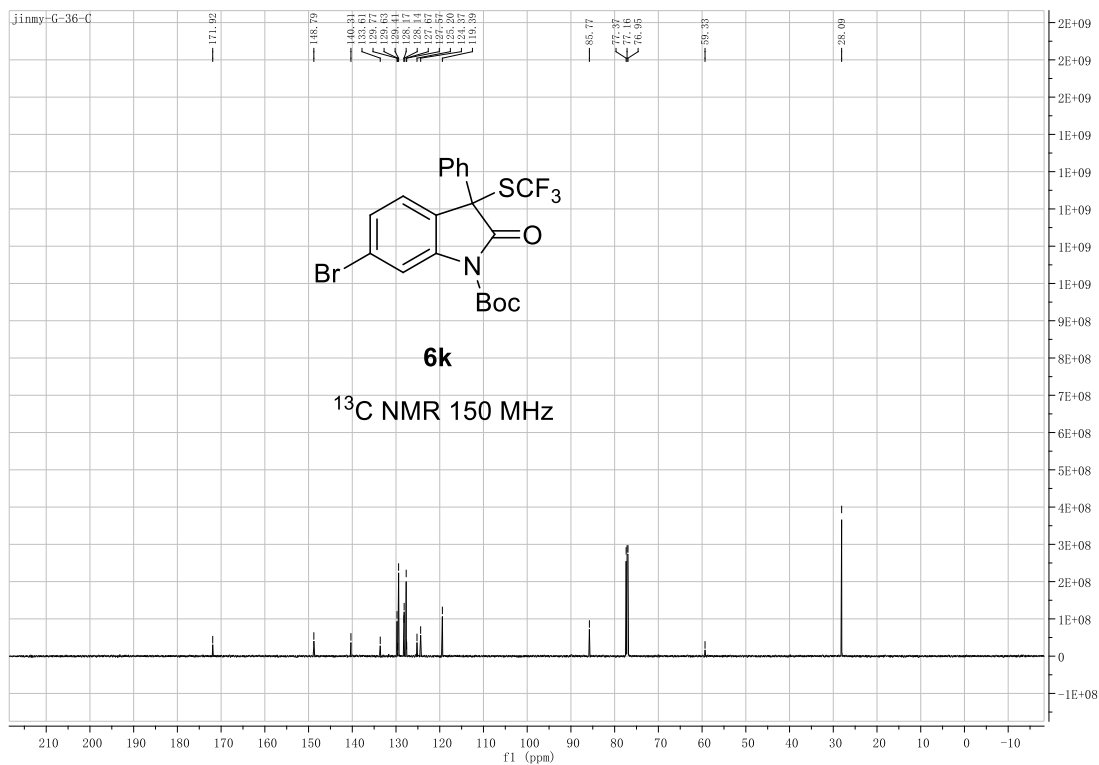



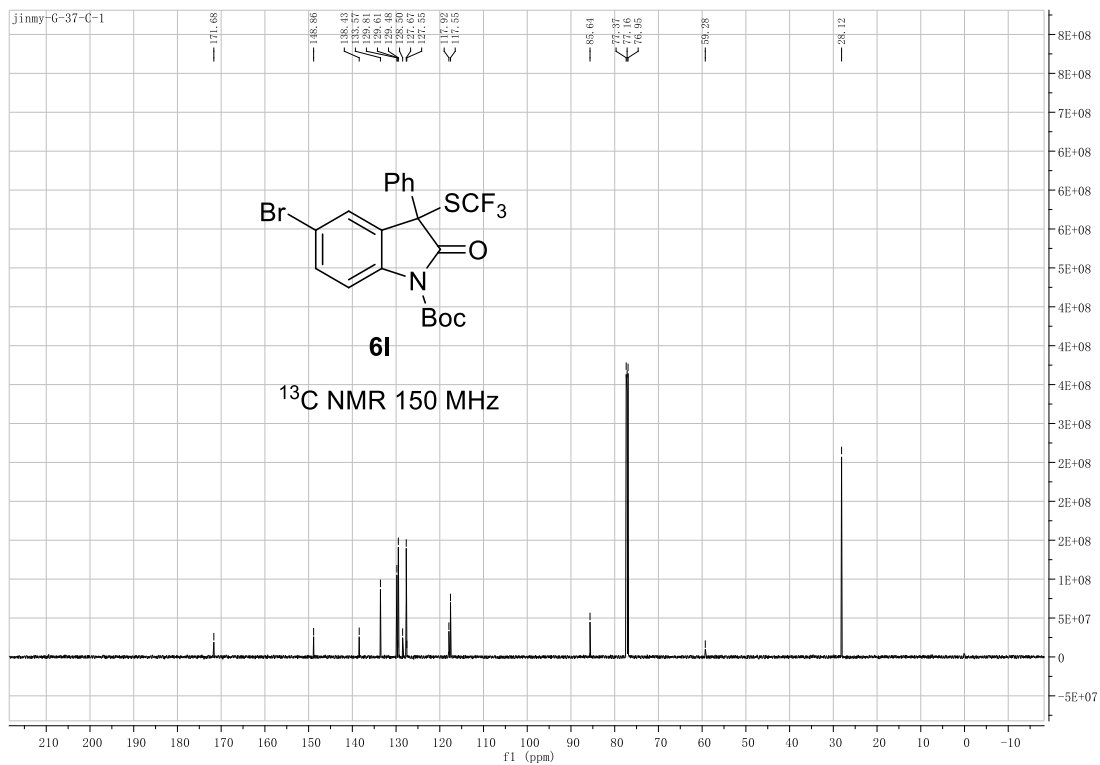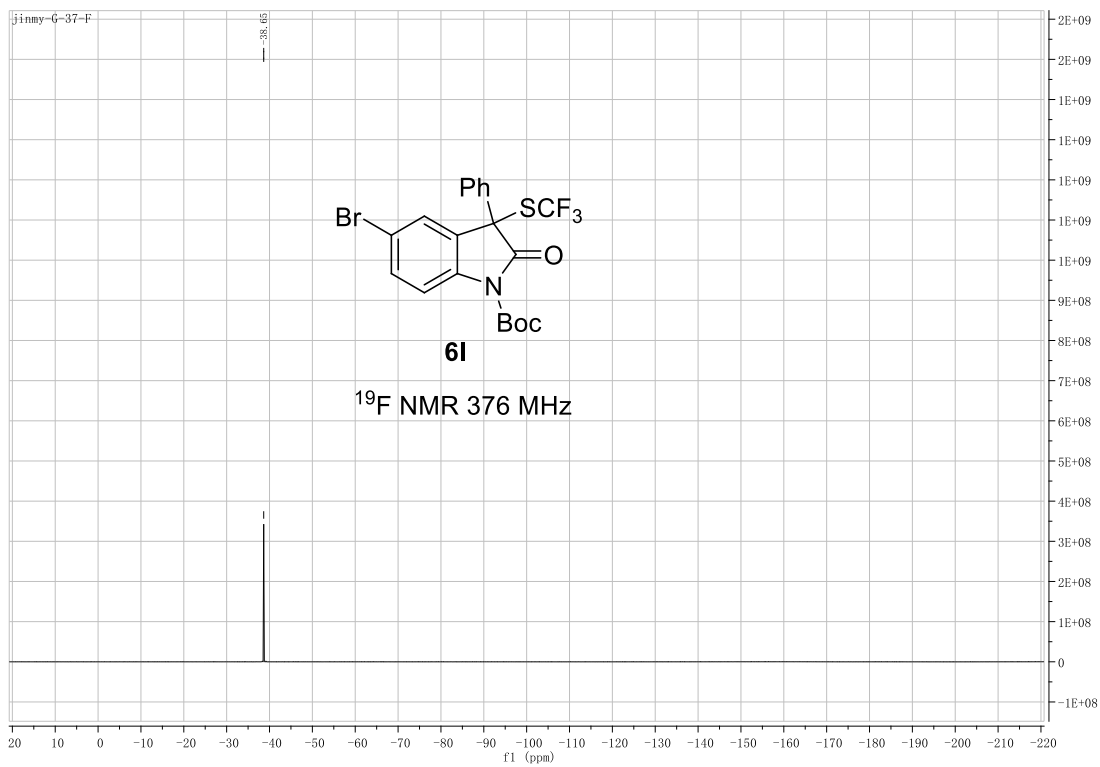



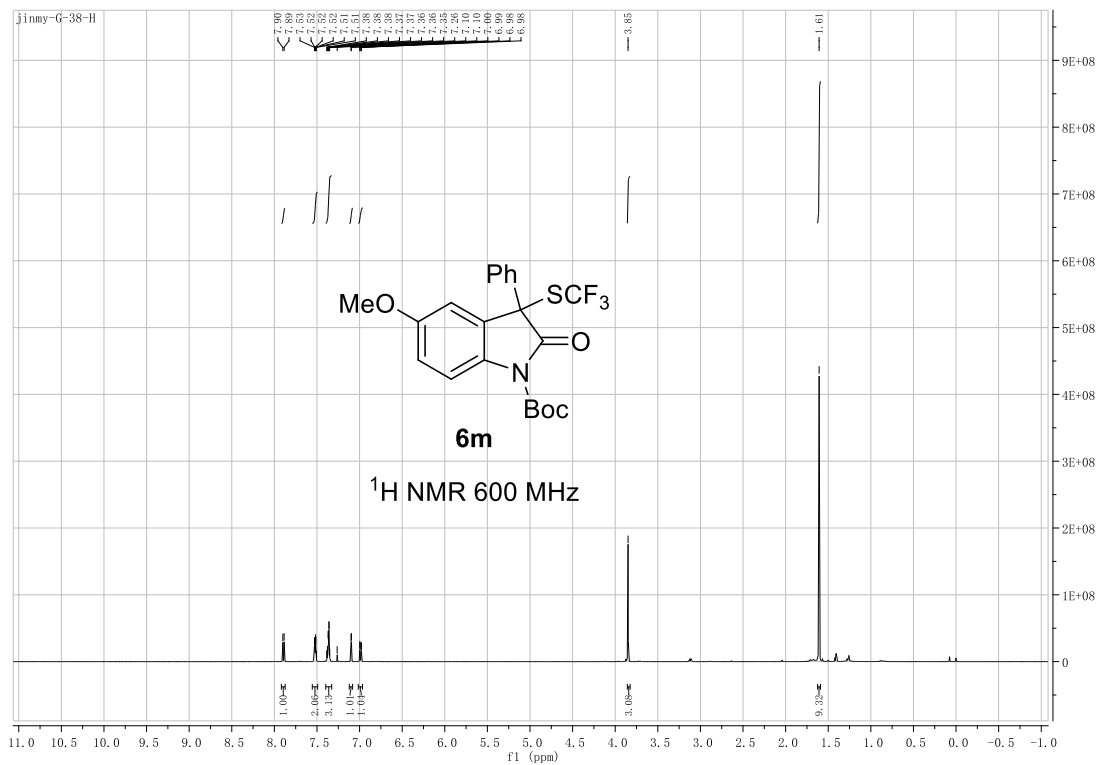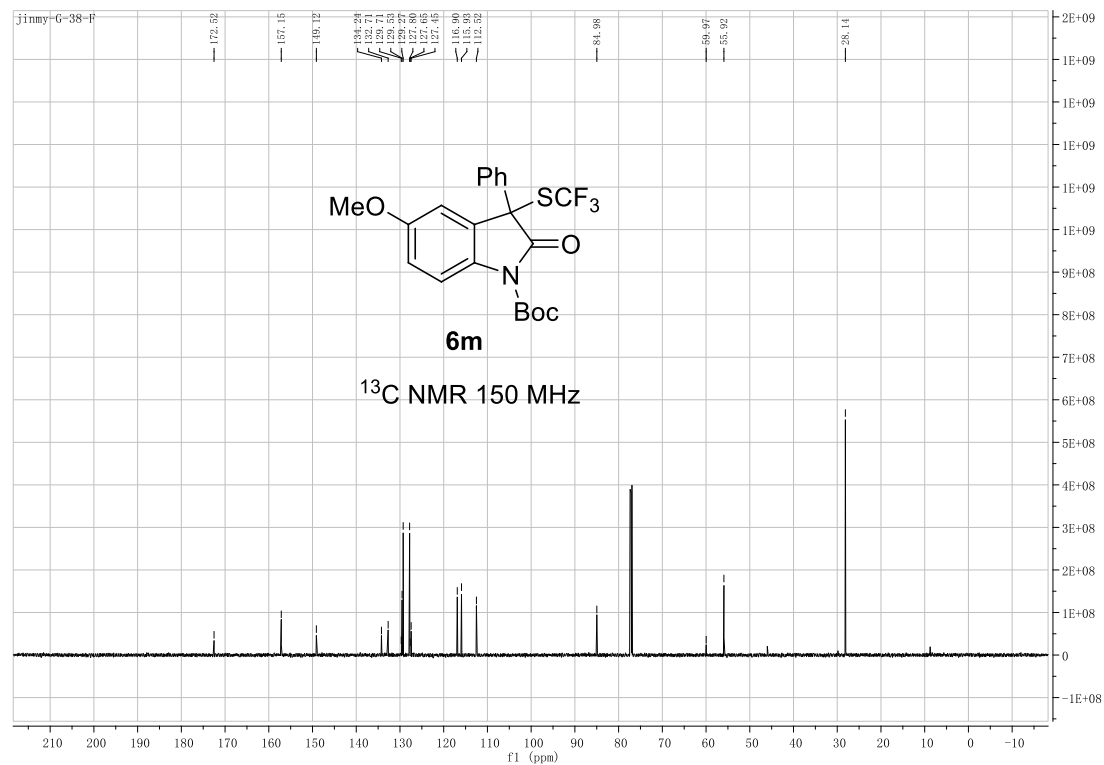

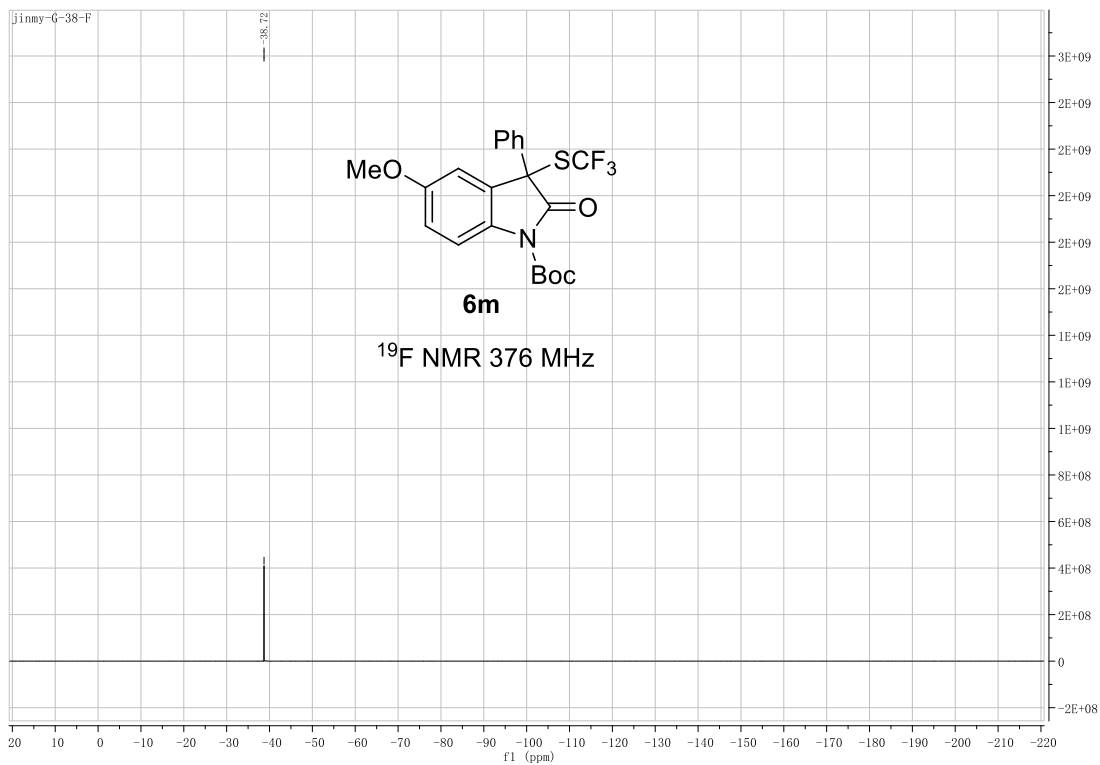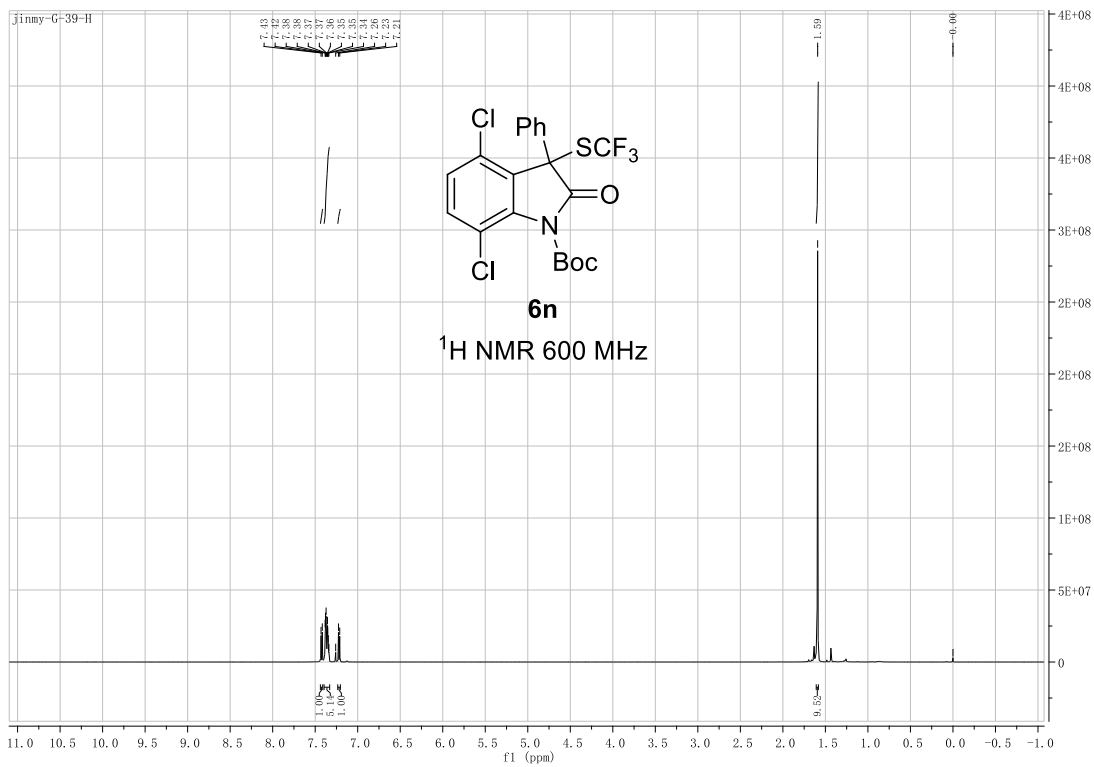

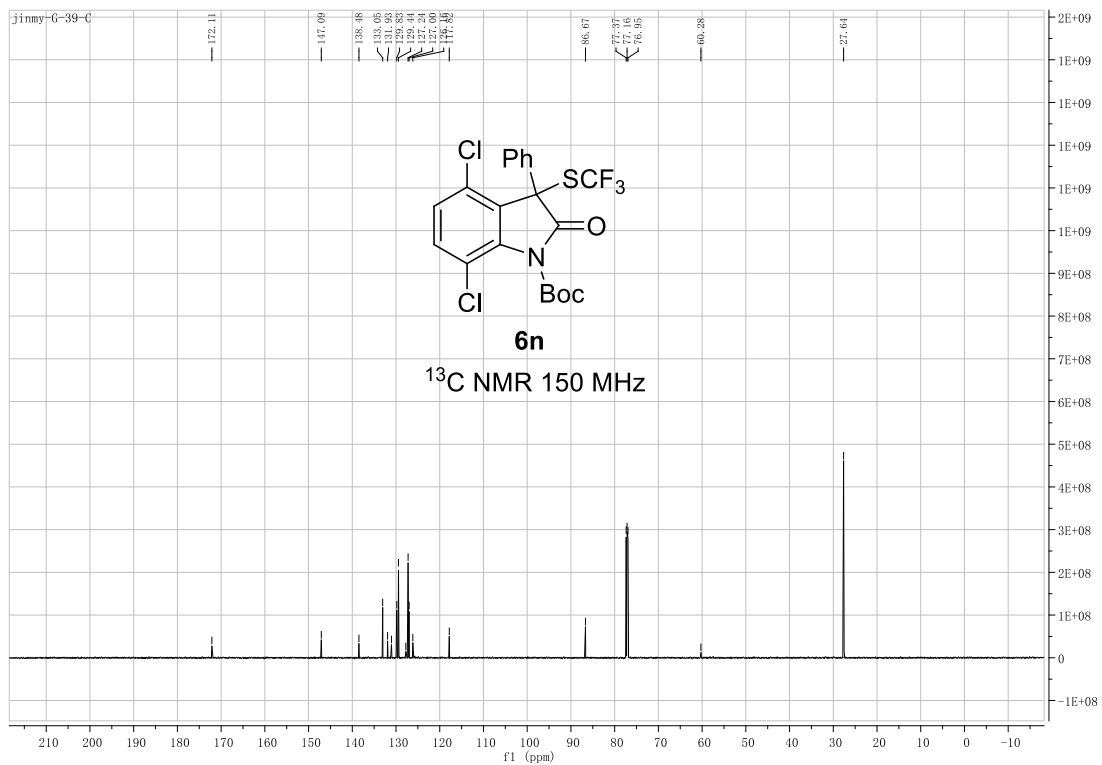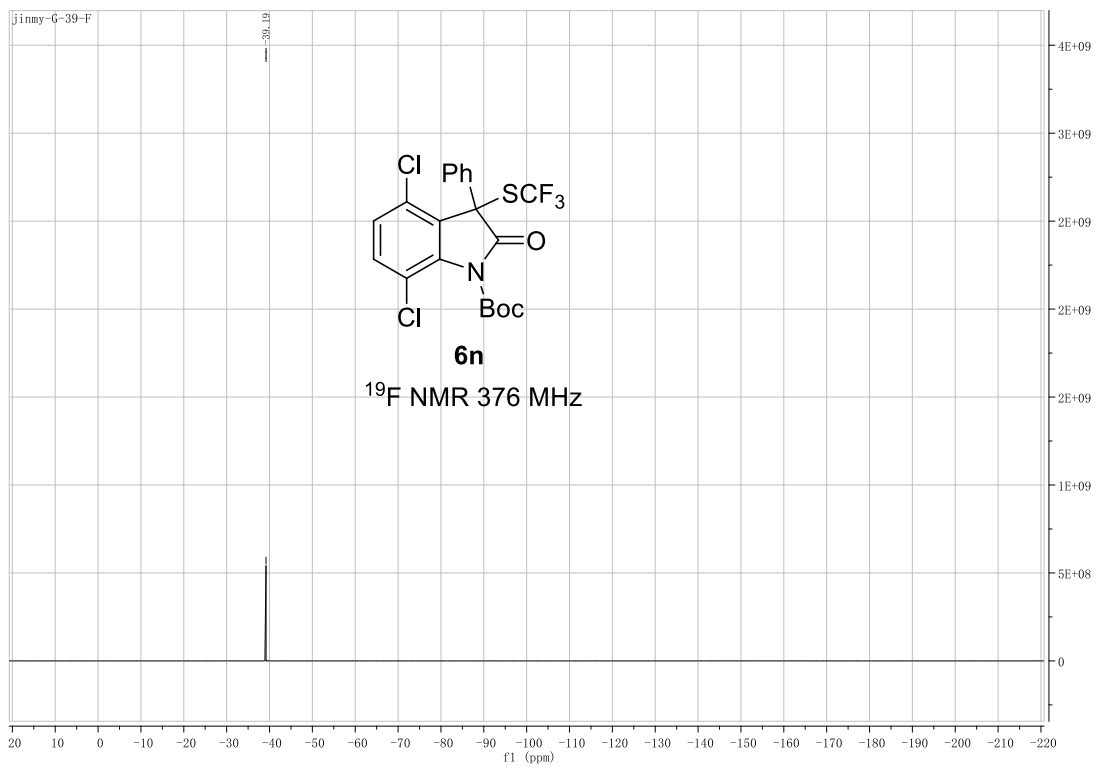



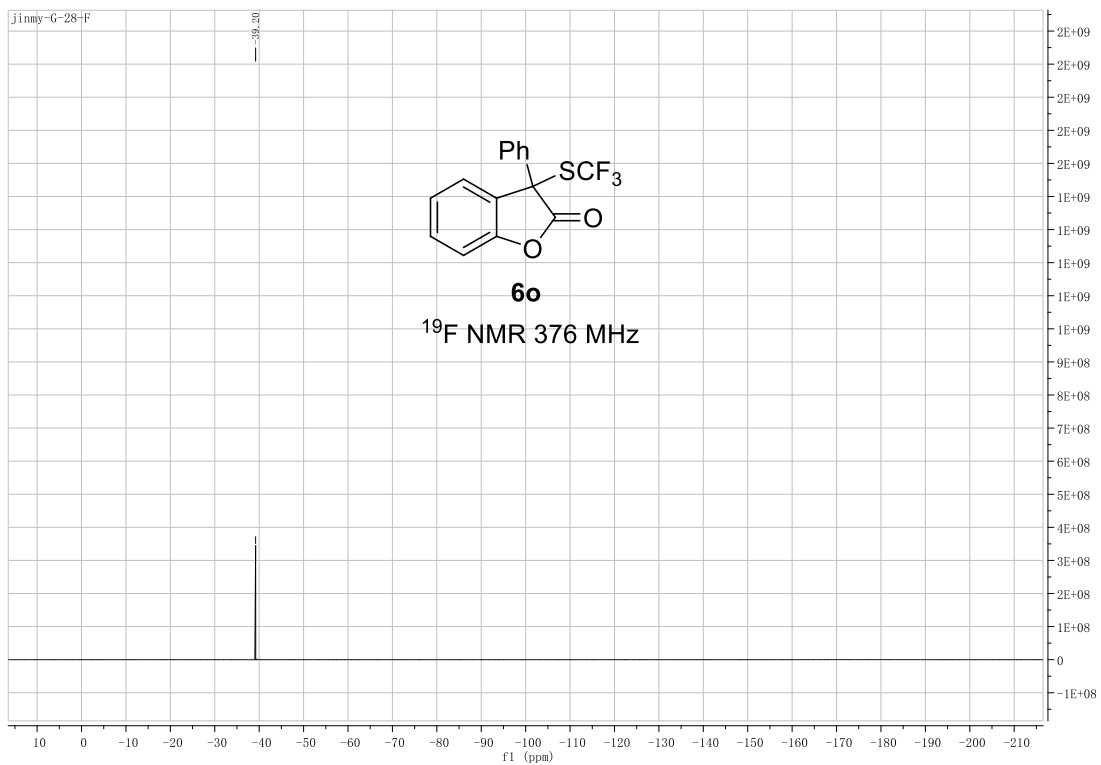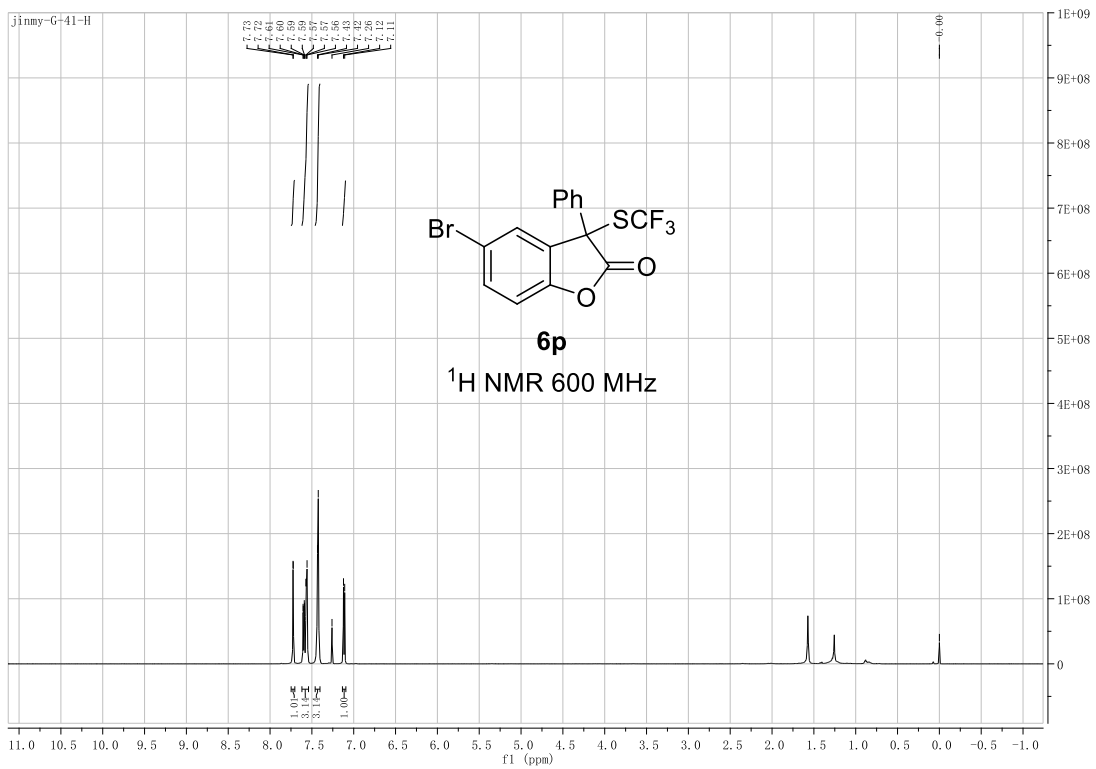

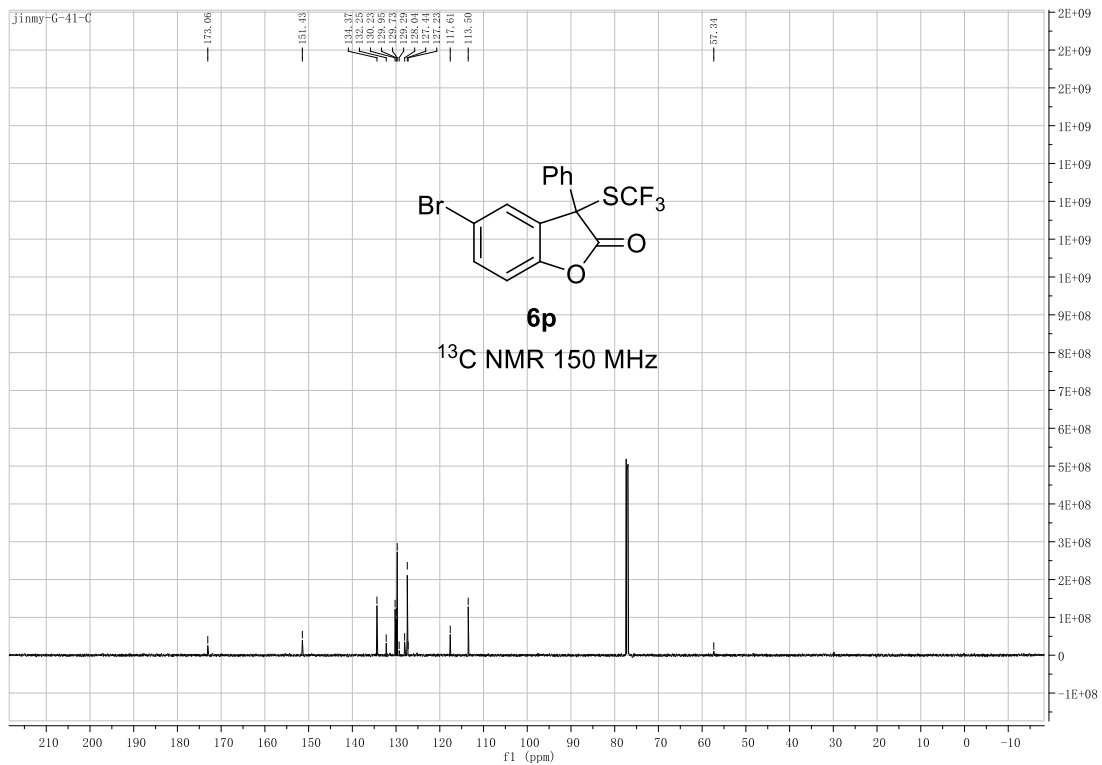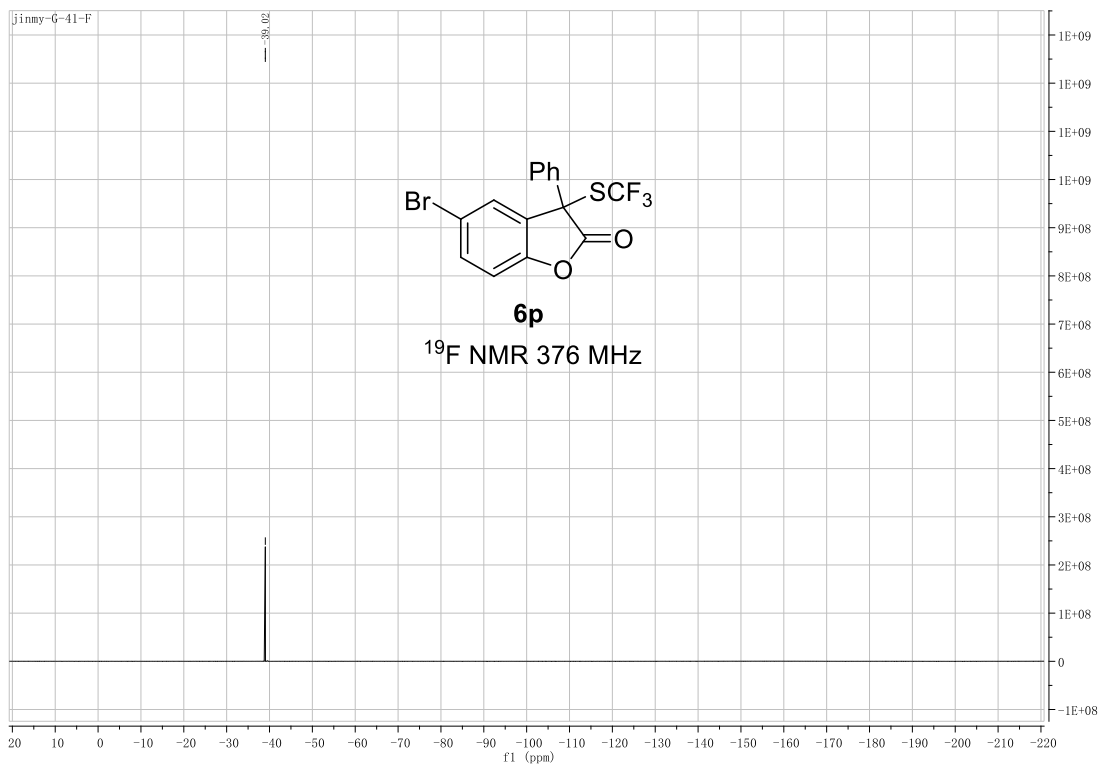

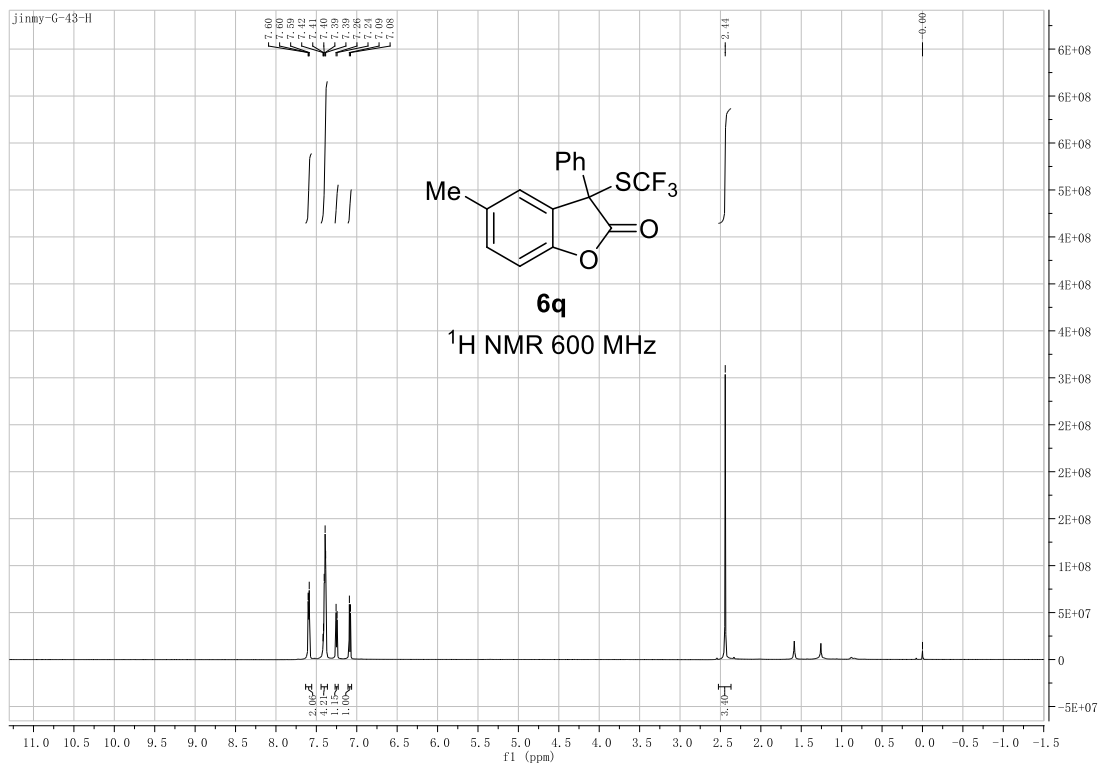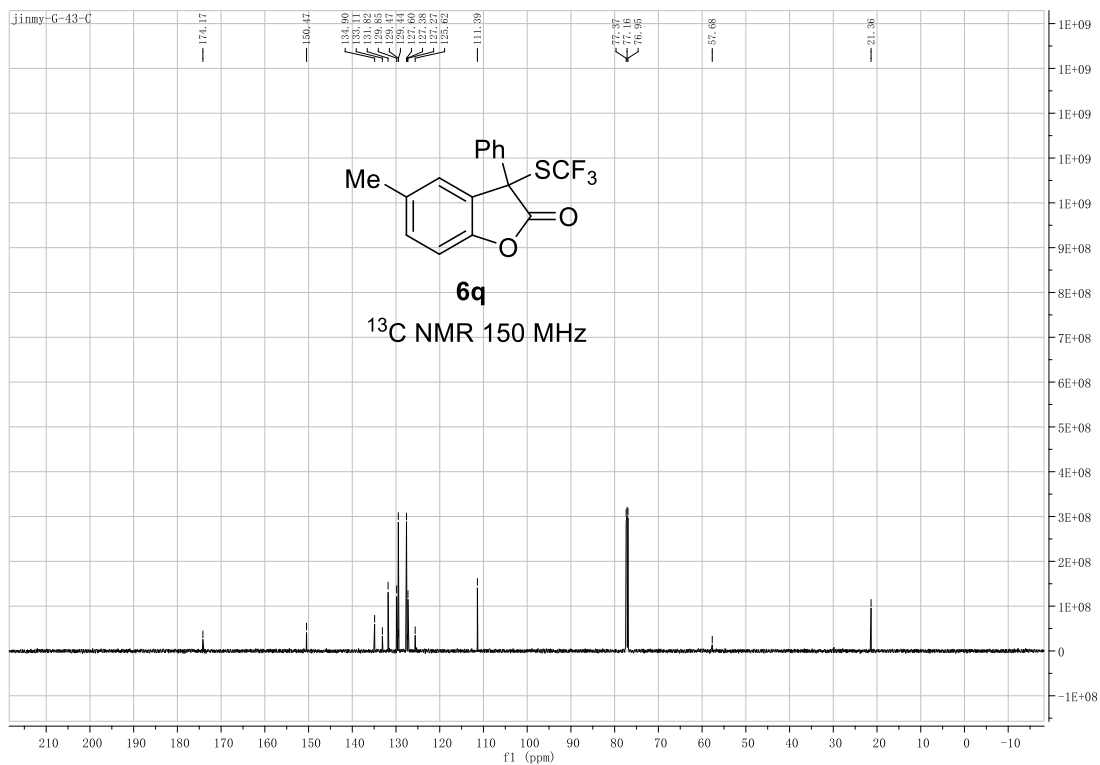





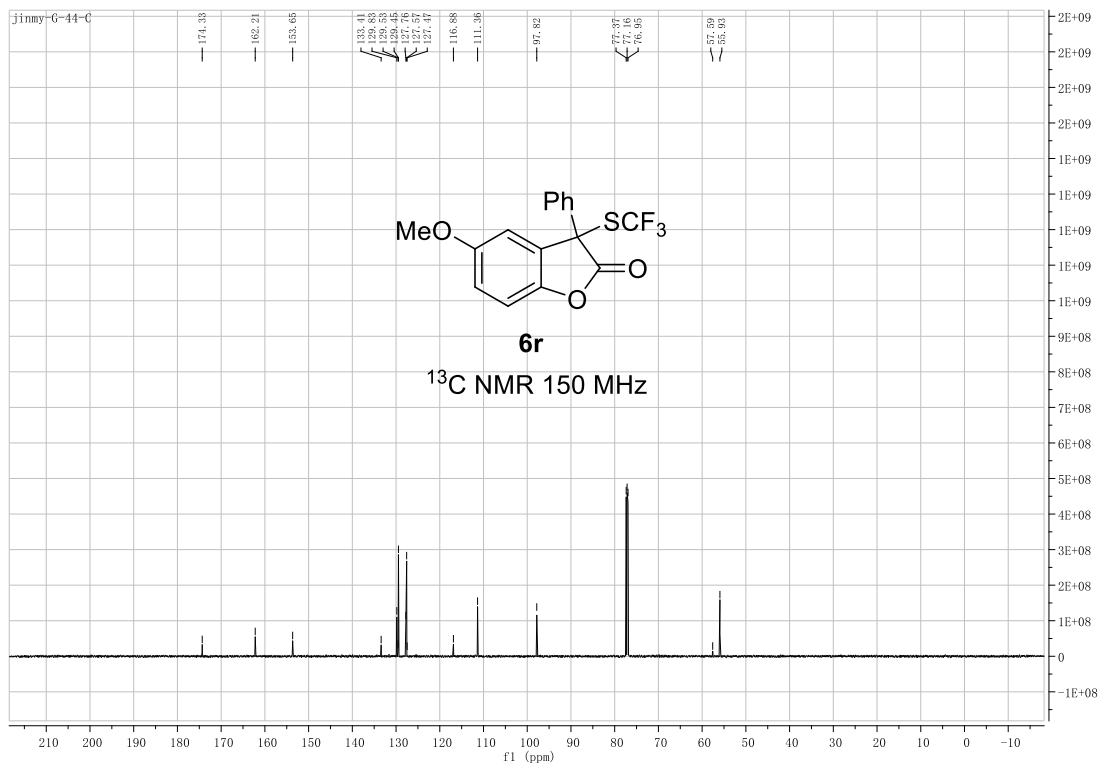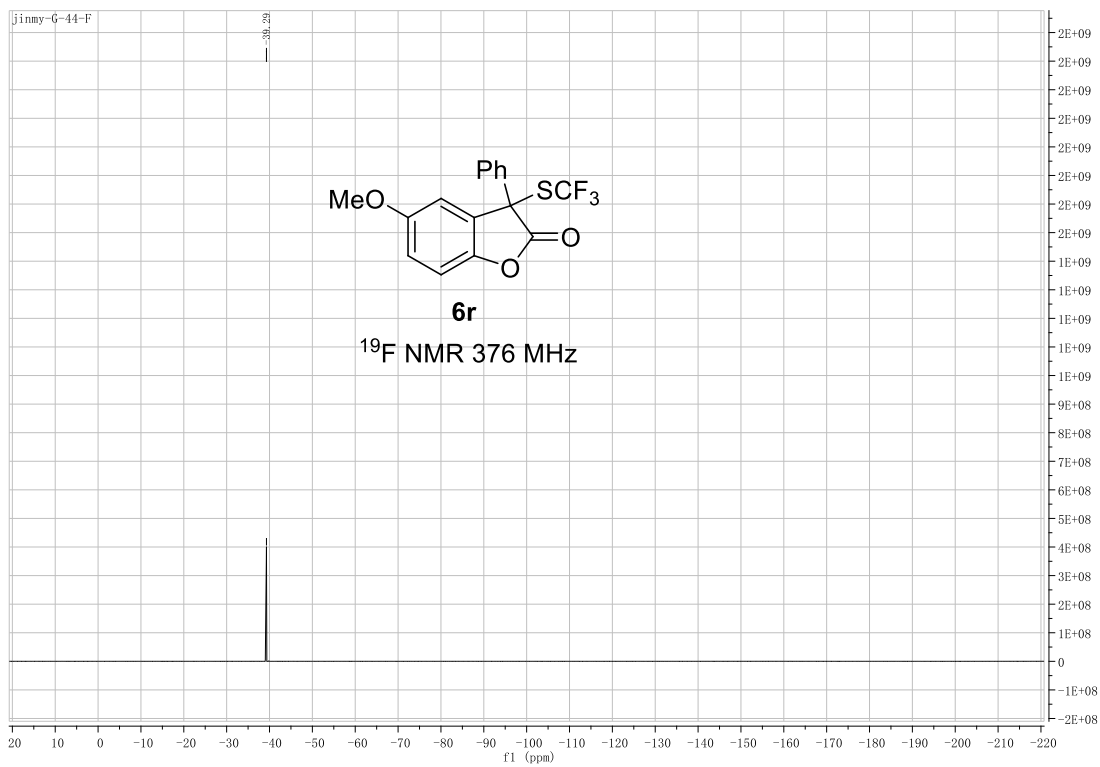



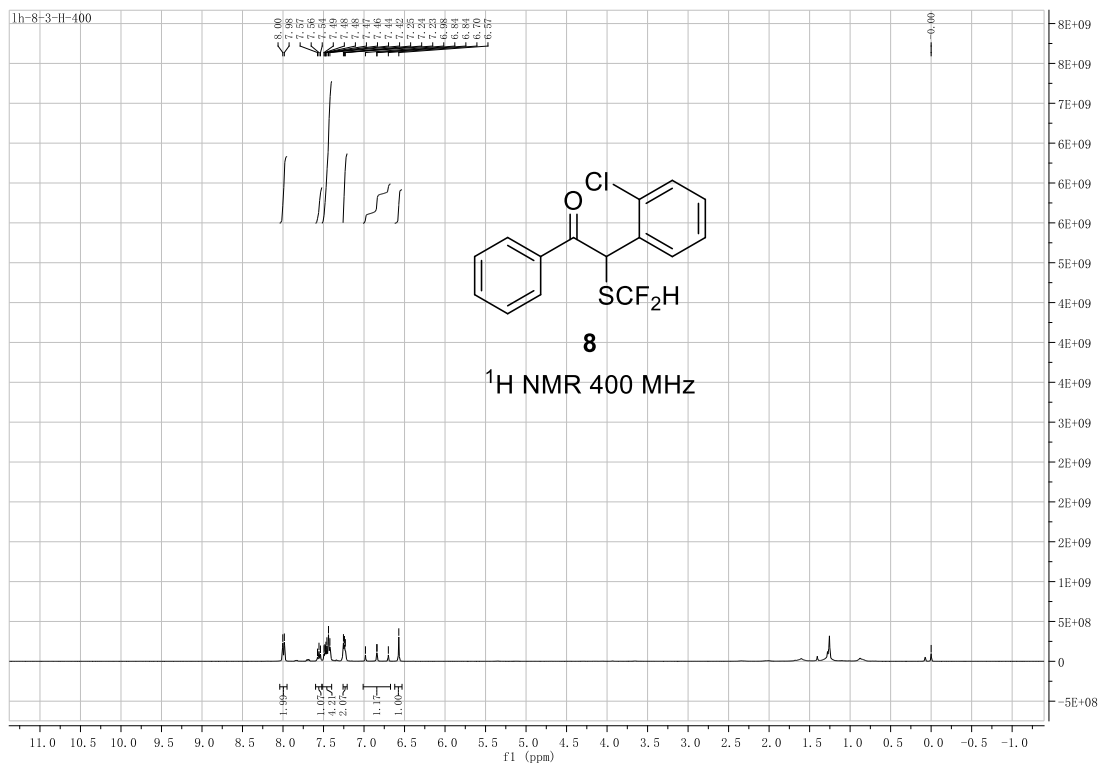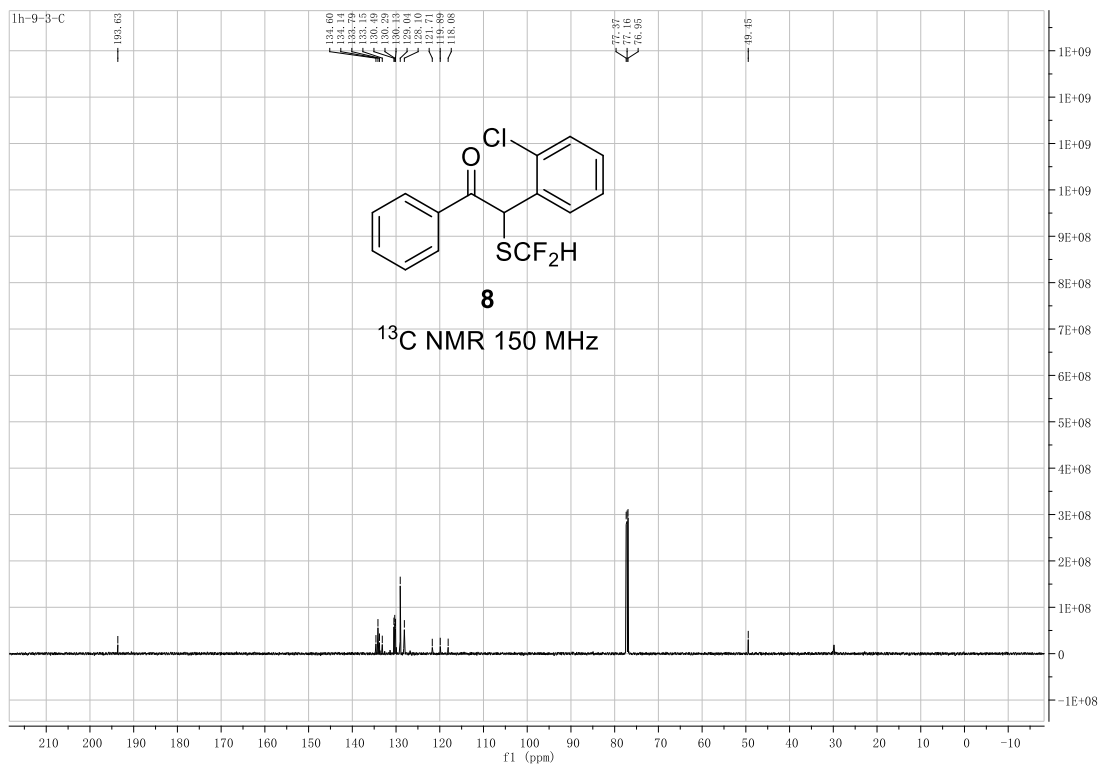



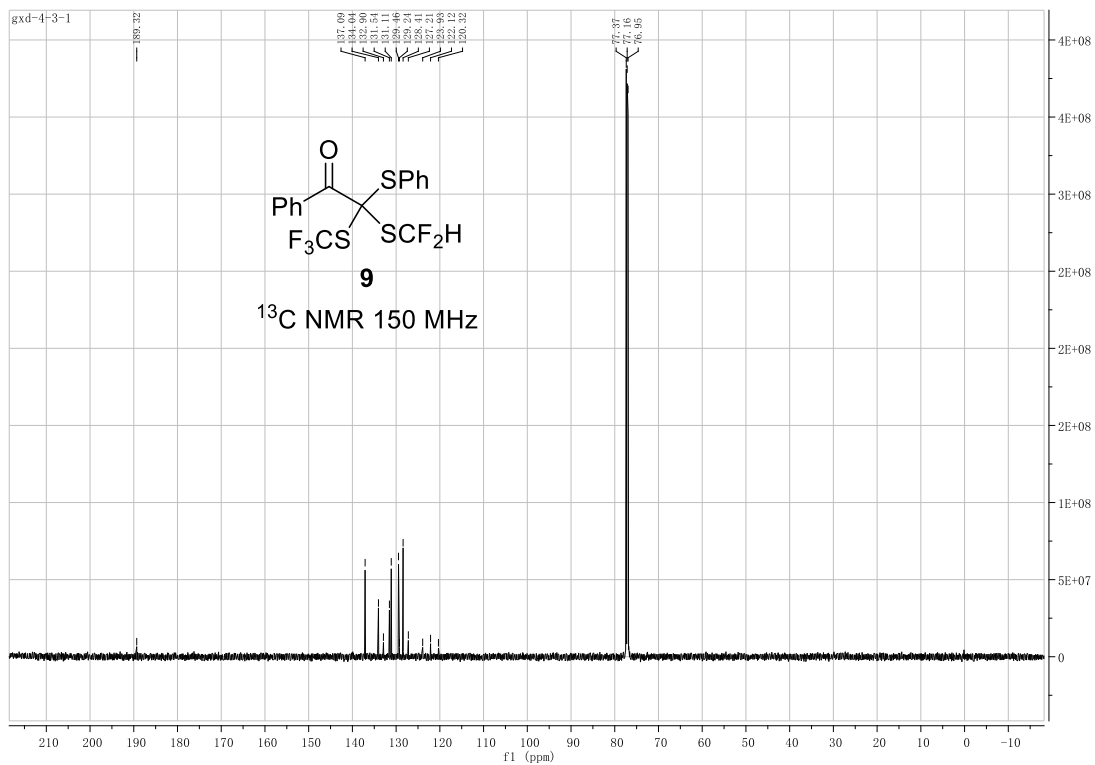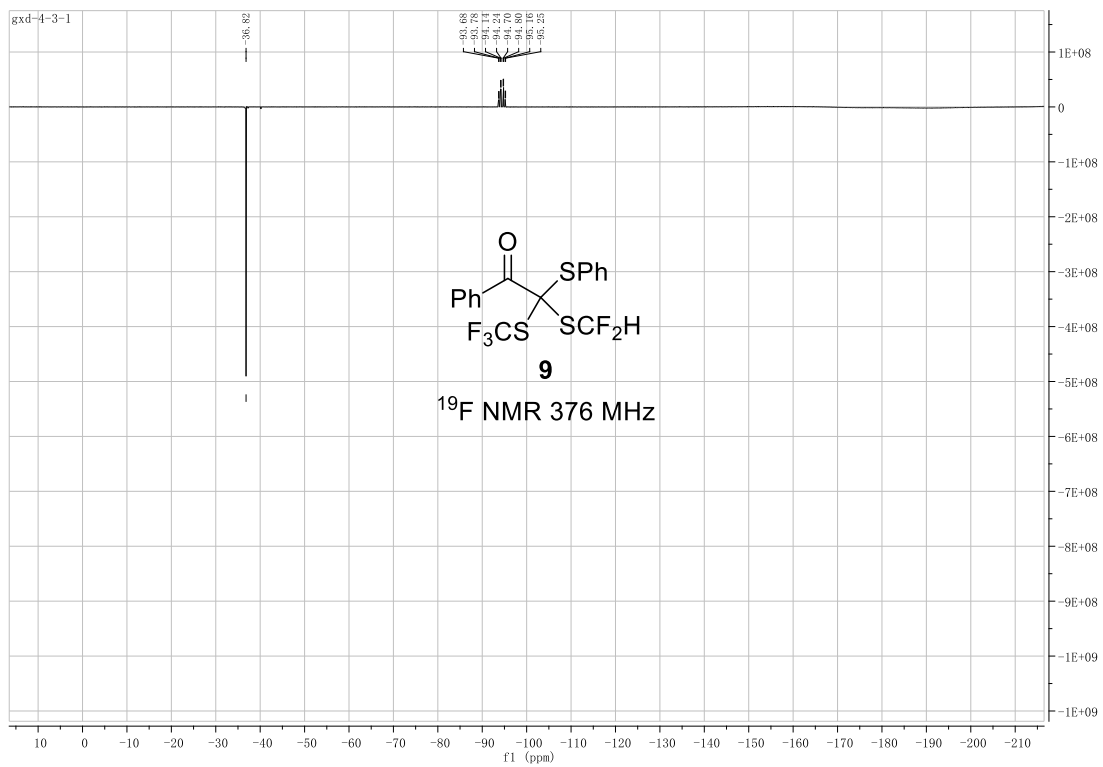

Supplement: d0cc04555a1.pdf [file d0cc04555a1.pdf]
